# Supplementary material for: Single-cell profiling reveals periventricular CD56bright NK cell accumulation in multiple sclerosis
Source: eLife. 2022 May 10;11:e73849. doi: 10.7554/eLife.73849 (PMC9135404; doi:10.7554/eLife.73849)
Supplement: Source data 1. — Median scaled intensities of the “state” (phenotype) markers for each cell population. [file elife-73849-data1.xlsx]

## Sheet: Proportions
Proportions
Septum general ADvsCon	p_val	p_adj	props_control01	props_control02	props_control07	props_control03	props_control06	props_control08	props_control11	props_control09	props_control10	props_ms02	props_ms03	props_ms09	props_ms04	props_ms05	props_ms07	props_ms12	props_ms08	props_ms10	props_ad02	props_ad03	props_ad04	props_ad07
CD8+ T cells	0.04377	0.3502	4.1	0.8	2.3	1.7	1.6	1	1	1	1.4	2.3	2.1	1.1	6.9	1.9	4.4	2.7	1.3	3.5	2.9	1.9	1.9	4.3
Monocytes	0.281	0.5619	0.8	0.1	0.2	0.1	0.1	0	0.1	0.1	0	0.3	0	0.1	0.1	0	0.1	0	0.2	0	0	0.1	0	0.1
Granulocytes	0.2525	0.5619	11.3	0.3	1.3	1.7	2.6	0.9	0.7	3.2	0.2	5.7	0.6	1.8	1.1	0.1	1.3	0.1	1.7	0	0.1	0.3	1.2	1.3
NK cells	0.1532	0.5619	0.1	0.3	0.3	0.1	0.4	0.1	0	0.2	0.4	0.2	0.3	0.4	0.1	0.3	0.8	0.7	0.4	0.3	0.2	0.1	0	0.2
B cell lineage	0.3908	0.6253	0.1	0.1	0	0	0.1	0	0.1	0	0	0.1	0.1	0.1	0.1	0.1	0.1	0.1	0.1	0	0	0	0	0.1
Myeloid	0.6486	0.6976	12.4	12.2	5.6	5.5	4.9	7.9	2.8	14.6	6.3	12.1	9.2	15.5	5	4.7	5.8	1.3	6	10.7	4.5	6.9	5.6	23.2
Microglia	0.6976	0.6976	68.1	82.6	86.9	85.9	86.3	88.8	93.3	80.1	89.8	77.9	84.1	78.9	82.3	89.3	81.6	91.3	87.6	83	90.2	87.9	89.2	55
CD4+ T cells	0.5334	0.6976	1.5	1.1	0.7	0.4	0.6	0.4	0.9	0.8	0.9	0.5	2.1	0.8	1.1	0.8	1.8	3.2	1	1.6	1.1	0.4	0.9	1.1
Undefined			1.3	2.2	0.6	4.4	3.2	0.8	1.2	0	0.8	0.8	1.4	1.4	0.8	2.7	3.3	0.2	1.5	0.7	0.7	2.1	1.1	14.4
CD45-			0.4	0.2	2.2	0.3	0.2	0.1	0	0	0.1	0.1	0.1	0	2.5	0.1	0.9	0.3	0.2	0.1	0.3	0.2	0	0.4
Septum general ADvsMS	p_val	p_adj	props_control01	props_control02	props_control07	props_control03	props_control06	props_control08	props_control11	props_control09	props_control10	props_ms02	props_ms03	props_ms09	props_ms04	props_ms05	props_ms07	props_ms12	props_ms08	props_ms10	props_ad02	props_ad03	props_ad04	props_ad07
NK cells	0.001886	0.01509	0.1	0.3	0.3	0.1	0.4	0.1	0	0.2	0.4	0.2	0.3	0.4	0.1	0.3	0.8	0.7	0.4	0.3	0.2	0.1	0	0.2
B cell lineage	0.02653	0.1061	0.1	0.1	0	0	0.1	0	0.1	0	0	0.1	0.1	0.1	0.1	0.1	0.1	0.1	0.1	0	0	0	0	0.1
CD4+ T cells	0.2436	0.6495	1.5	1.1	0.7	0.4	0.6	0.4	0.9	0.8	0.9	0.5	2.1	0.8	1.1	0.8	1.8	3.2	1	1.6	1.1	0.4	0.9	1.1
Myeloid	0.4883	0.9767	12.4	12.2	5.6	5.5	4.9	7.9	2.8	14.6	6.3	12.1	9.2	15.5	5	4.7	5.8	1.3	6	10.7	4.5	6.9	5.6	23.2
Microglia	0.9973	0.9973	68.1	82.6	86.9	85.9	86.3	88.8	93.3	80.1	89.8	77.9	84.1	78.9	82.3	89.3	81.6	91.3	87.6	83	90.2	87.9	89.2	55
Monocytes	0.9265	0.9973	0.8	0.1	0.2	0.1	0.1	0	0.1	0.1	0	0.3	0	0.1	0.1	0	0.1	0	0.2	0	0	0.1	0	0.1
Granulocytes	0.9245	0.9973	11.3	0.3	1.3	1.7	2.6	0.9	0.7	3.2	0.2	5.7	0.6	1.8	1.1	0.1	1.3	0.1	1.7	0	0.1	0.3	1.2	1.3
CD8+ T cells	0.8335	0.9973	4.1	0.8	2.3	1.7	1.6	1	1	1	1.4	2.3	2.1	1.1	6.9	1.9	4.4	2.7	1.3	3.5	2.9	1.9	1.9	4.3
Undefined			1.3	2.2	0.6	4.4	3.2	0.8	1.2	0	0.8	0.8	1.4	1.4	0.8	2.7	3.3	0.2	1.5	0.7	0.7	2.1	1.1	14.4
CD45-			0.4	0.2	2.2	0.3	0.2	0.1	0	0	0.1	0.1	0.1	0	2.5	0.1	0.9	0.3	0.2	0.1	0.3	0.2	0	0.4
Septum general MSvsCon	p_val	p_adj	props_control01	props_control02	props_control07	props_control03	props_control06	props_control08	props_control11	props_control09	props_control10	props_ms02	props_ms03	props_ms09	props_ms04	props_ms05	props_ms07	props_ms12	props_ms08	props_ms10	props_ad02	props_ad03	props_ad04	props_ad07
CD4+ T cells	0.02257	0.08498	1.5	1.1	0.7	0.4	0.6	0.4	0.9	0.8	0.9	0.5	2.1	0.8	1.1	0.8	1.8	3.2	1	1.6	1.1	0.4	0.9	1.1
NK cells	0.03187	0.08498	0.1	0.3	0.3	0.1	0.4	0.1	0	0.2	0.4	0.2	0.3	0.4	0.1	0.3	0.8	0.7	0.4	0.3	0.2	0.1	0	0.2
CD8+ T cells	0.02133	0.08498	4.1	0.8	2.3	1.7	1.6	1	1	1	1.4	2.3	2.1	1.1	6.9	1.9	4.4	2.7	1.3	3.5	2.9	1.9	1.9	4.3
B cell lineage	0.08134	0.1627	0.1	0.1	0	0	0.1	0	0.1	0	0	0.1	0.1	0.1	0.1	0.1	0.1	0.1	0.1	0	0	0	0	0.1
Monocytes	0.1359	0.2174	0.8	0.1	0.2	0.1	0.1	0	0.1	0.1	0	0.3	0	0.1	0.1	0	0.1	0	0.2	0	0	0.1	0	0.1
Granulocytes	0.181	0.2413	11.3	0.3	1.3	1.7	2.6	0.9	0.7	3.2	0.2	5.7	0.6	1.8	1.1	0.1	1.3	0.1	1.7	0	0.1	0.3	1.2	1.3
Microglia	0.6234	0.7125	68.1	82.6	86.9	85.9	86.3	88.8	93.3	80.1	89.8	77.9	84.1	78.9	82.3	89.3	81.6	91.3	87.6	83	90.2	87.9	89.2	55
Myeloid	0.7623	0.7623	12.4	12.2	5.6	5.5	4.9	7.9	2.8	14.6	6.3	12.1	9.2	15.5	5	4.7	5.8	1.3	6	10.7	4.5	6.9	5.6	23.2
Undefined			1.3	2.2	0.6	4.4	3.2	0.8	1.2	0	0.8	0.8	1.4	1.4	0.8	2.7	3.3	0.2	1.5	0.7	0.7	2.1	1.1	14.4
CD45-			0.4	0.2	2.2	0.3	0.2	0.1	0	0	0.1	0.1	0.1	0	2.5	0.1	0.9	0.3	0.2	0.1	0.3	0.2	0	0.4

## Sheet: Expression
Expression
unique
Septum general populations; MSvsCon	p_val	cluster_id	marker_id	p_adj	control01	control02	ad02	control07	ms02	ms03	ms09	ms04	control03	ad03	ms05	ms07	ms12	control06	ms08	ms10	control08	control11	control09	ad04	control10	ad07
B cell lineage_CD25 (IL_2R)	0.455499	B cell lineage	CD25 (IL_2R)	0.819898	0.0665508	0.271068	1.1585	3.35097	1.17361	0.517578	0.346408	3.64447	1.15802	3.97559	0.980413	3.64596	2.18035	0.2496	0.344444	0.662301	0.648073	0.142613	0	3.42744	0.546596	3.77554
B cell lineage_CD31/PECAM_1	0.811977	B cell lineage	CD31/PECAM_1	0.897957	0.40125	0.12805	0.147663	0.76282	0.0852965	0.160014	0.33604	0	0.12069	0.0830904	0.373271	0.0301954	0.0803136	0.285313	0.0770211	0.56023	0.241253	0.108089	0.085713	0.0549723	0.234154	0.180223
B cell lineage_CD45RA	0.264028	B cell lineage	CD45RA	0.792084	3.95797	3.70775	4.27113	3.75102	3.87726	3.84425	4.36611	3.92906	3.57512	3.7681	4.0676	3.85449	4.04099	4.58022	4.182	4.85098	4.15075	4.40424	4.26907	3.61697	4.05488	3.79917
B cell lineage_CD45RO	0.897957	B cell lineage	CD45RO	0.897957	0.0872833	0.107195	0.00619996	0.358285	0.032994	0.0112998	0.174802	0	0	0.253471	0.332821	0.0239977	0.1062	0.119317	0.0928665	0.272692	0.00619996	0.0126997	0.187989	0.0297956	0.357534	0.289921
B cell lineage_CD49d	0.25721	B cell lineage	CD49d	0.792084	2.02958	2.5678	3.11051	4.41693	2.88757	2.76649	2.55401	4.48741	2.33589	4.83767	3.56243	4.75367	4.42362	2.53194	2.29007	2.66155	2.58309	2.4162	2.28488	4.47032	2.97584	4.78593
B cell lineage_CD54	0.841138	B cell lineage	CD54	0.897957	0.414342	0.187892	0.24669	0.753402	0.132214	0.513484	0.807624	0	0.193686	0.0784192	0.876841	0.156362	0.0413882	0.618922	0.424894	0.654794	0.385947	0.189746	0.9018	0.264891	1.08778	0.185927
B cell lineage_CD69	0.772505	B cell lineage	CD69	0.897957	0.376602	0.223339	0.1613	0	0.109183	0.528839	0.260225	0	0.0129985	0	0.419029	0	0.154781	0.319915	0	0.866991	0	2.11082	0.147494	0	0.247854	0
B cell lineage_FoxP3	0.0791868	B cell lineage	FoxP3	0.712681	1.80733	2.38568	0.986188	1.18745	1.58894	1.30445	1.86881	1.04269	1.82189	0.904074	1.50362	0.755	0.163668	1.39024	1.02018	0.981394	1.22294	0.770839	1.70566	1.12993	1.81436	0.676101
B cell lineage_Tbet	0.411115	B cell lineage	Tbet	0.819898	0.158825	0.732824	0.392448	0.223334	0	0.143306	0.870402	0	0	0	0.262766	0	0.0131996	0.814653	0.123486	0.645191	0.18101	0	1.945	0.0189989	0.461733	0
CD4+ T cells_CD25 (IL_2R)	0.118167	CD4+ T cells	CD25 (IL_2R)	0.472667	0	0	0	0	0.210932	0.0972467	0.132809	0.036292	0	0.0677482	0.238726	0	0	0.0727358	0	0.123883	0.202807	0.0221982	0.0756278	0	0.00479998	0.27993
CD4+ T cells_CD28	0.592053	CD4+ T cells	CD28	0.865718	0.705422	0.510267	0.460995	0.963201	0.920147	0.667025	1.5155	0.851072	0.503814	0.972364	0.915325	0.695865	0.40937	1.41354	0.749137	0.593363	0.983304	0.644949	0.799173	0.470094	0.554624	0.47503
CD4+ T cells_CD31/PECAM_1	0.360819	CD4+ T cells	CD31/PECAM_1	0.865718	0.00559997	0	0.00739993	0.093663	0.0850973	0	0.192214	0	0.0587662	0.137566	0.0265969	0	0.00869989	0.140735	0.0129996	0.178451	0.445878	0.190054	0.0536742	0.268367	0.126463	0.0553717
CD4+ T cells_CD45RA	0.0942304	CD4+ T cells	CD45RA	0.472667	0.210248	0.289537	0.156065	0.20692	0.417463	0.200063	0.414066	0.129438	0.258511	0.394118	0.251151	0.129637	0.0142995	0.368784	0.15063	0.133305	0.719023	0.267209	0.104211	0.18101	0.723899	0.151124
CD4+ T cells_CD45RO	0.0593594	CD4+ T cells	CD45RO	0.472667	2.51897	3.22696	2.80614	2.90266	2.7054	2.79398	3.64738	2.68954	2.90877	2.97595	3.24369	3.03325	2.86535	2.49686	2.70136	3.50013	2.6354	2.69956	3.16694	3.21367	2.55548	3.62324
CD4+ T cells_CD49d	0.721431	CD4+ T cells	CD49d	0.865718	1.56956	1.7649	1.81946	2.00184	1.43808	1.58964	2.50844	2.17541	0.959063	1.57712	1.33341	1.56284	0.924676	1.93091	1.34752	1.88682	2.3027	1.95401	1.21484	1.82419	2.35156	1.79089
CD4+ T cells_CD54	0.987919	CD4+ T cells	CD54	0.987919	0	0.0306952	0	0.095455	0.0121997	0.0371914	0.124875	0	0.041588	0	0.102023	0	0	0.110376	0.0763259	0.313823	0.084898	0.0109998	0.113456	0.0932647	0.346806	0.313347
CD4+ T cells_CD69	0.690068	CD4+ T cells	CD69	0.865718	3.09403	3.45205	2.82836	2.73238	3.49545	3.15791	3.1103	3.54874	3.12525	3.86285	2.64486	2.94208	1.82119	3.1584	2.39147	3.26244	3.22894	3.09657	3.34767	3.7488	2.35436	3.66656
CD4+ T cells_FoxP3	0.474186	CD4+ T cells	FoxP3	0.865718	1.14285	1.58127	0.695385	0.899639	1.05344	0.554366	1.11178	0.991547	0.743563	1.34401	0.969317	0.318013	0.0406888	0.436414	0.389664	0.529245	0.804102	0.331685	0.643632	0.554711	0.942657	0.518986
CD4+ T cells_Gata3	0.959026	CD4+ T cells	Gata3	0.987919	0.615244	1.02535	0.40771	0.852805	0.558508	0.710813	1.02618	0.624091	0.572423	0.70272	1.0207	0.43933	0.165543	0.744338	0.468295	1.29757	0.825718	0.522675	0.633888	0.641654	1.27736	0.808272
CD4+ T cells_PD1	0.661996	CD4+ T cells	PD1	0.865718	0.789265	2.0387	1.01322	1.76826	1.64597	1.37978	1.86254	0.877335	2.80571	2.15069	1.35703	1.53979	1.42624	0.963201	1.64537	2.49414	0.752688	1.37256	2.06016	1.75107	1.14093	2.10264
CD4+ T cells_Tbet	0.577695	CD4+ T cells	Tbet	0.865718	1.64894	1.83464	1.80726	2.17794	1.03705	1.37618	1.53115	1.20355	1.48361	1.65035	1.9879	1.38215	0.989981	1.86042	1.58949	2.18815	0.768645	1.15518	1.70981	1.59784	2.52982	1.47638
CD45-_CD25 (IL_2R)	0.61156	CD45-	CD25 (IL_2R)	0.691503	0.955584	1.70584	2.17183	2.06224	1.43484	1.01085	0.859106	2.1116	1.87124	1.74438	1.49302	0.586749	2.16205	0.513001	0.435316	1.36874	1.99348	0.244167	0	0.771378	1.8764	1.68054
CD45-_CD31/PECAM_1	0.353322	CD45-	CD31/PECAM_1	0.691503	0	0.0168991	0.0443854	0.173922	0	0.0092998	0.0514773	0	0	0	0	0	0.00929986	0	0	0.156658	0.0701425	0.111767	0	0.0370863	0.239115	0.0762261
CD45-_CD45RA	0.769757	CD45-	CD45RA	0.769757	1.04934	1.75624	2.06424	2.04643	1.17733	2.07492	1.97072	2.25404	2.08266	1.58674	1.28356	0.766048	2.03018	0.771542	1.32327	1.60973	2.221	2.41812	0.629909	1.12529	2.13602	1.73645
CD45-_CD45RO	0.497506	CD45-	CD45RO	0.691503	0.629079	0.149641	0	0.0138996	0.23717	0.0721368	0.483608	0.0028	0.0008	0.442243	0.597335	0.218849	0	0.564876	0.188875	0.243677	0	0.318774	0.111568	0.203191	0.259276	0.253864
CD45-_CD49d	0.594332	CD45-	CD49d	0.691503	2.26495	2.80326	3.20886	3.01278	2.69082	2.63467	2.78946	3.11798	2.88343	2.97835	2.74352	1.84017	3.24446	1.43529	1.91335	2.58165	3.08782	2.11954	0.582326	2.34043	2.98752	2.77808
CD45-_CD54	0.0278402	CD45-	CD54	0.250562	0.136575	0.00909987	0	0	0.0902773	0.21288	0.810277	0	0	0.133999	0.373363	0	0	0.0635572	0.244651	0.11276	0	0.203003	0.233668	0.060063	0.107294	0.0982406
CD45-_FoxP3	0.592527	CD45-	FoxP3	0.691503	2.45608	1.76583	0.566938	1.32882	1.65942	0.443864	1.54878	0.516876	1.07613	1.98099	2.71339	0.988151	0.357063	1.72155	0.497963	0.706532	0.528632	0.411305	1.45918	0.322512	1.46494	1.15317
CD45-_Gata3	0.614669	CD45-	Gata3	0.691503	0.0611619	0.163175	0.107195	0.0969481	0.0211984	0.181698	0.34558	0.0549723	0.0649543	0.0357924	0.0725364	0	0.0434863	0.0195987	0.118621	0.283005	0.0878868	0.505938	0.322196	0.0524757	0.109877	0.0742318
CD45-_PDL1	0.293627	CD45-	PDL1	0.691503	0.263925	0.356312	0.181403	0.296439	0.388178	0.198298	0.342183	0.273575	0.312489	0.332821	0.499294	0.0597644	0.120307	0.112761	0.144101	0.346615	0.17274	0.180616	0	0.0406875	0.350728	0.163865
CD8+ T cells_CD25 (IL_2R)	0.677393	CD8+ T cells	CD25 (IL_2R)	0.677393	0	0	0	0	0.0251973	0	0	0.018399	0	0.0319945	0.0801143	0	0	0.156658	0	0.132512	0	0	0	0	0.00439999	0.420865
CD8+ T cells_CD31/PECAM_1	0.597876	CD8+ T cells	CD31/PECAM_1	0.67261	0.0006	0.361007	0.277813	0.30982	0.128447	0.230552	0.72217	0.103217	0.0139995	0.128645	0.253768	0.0129996	0	0.312585	0.155374	0.331495	0.137566	0.167811	0.248824	0.052376	0.425357	0.322386
CD8+ T cells_CD45RA	0.156843	CD8+ T cells	CD45RA	0.67261	0.456752	0.271743	0.0671495	0.311536	0.231526	0.274538	0.469554	0.133701	0.223143	0.304092	0.294619	0.130826	0.00719994	0.34275	0.185337	0.182879	0.233084	0.310201	0.272514	0.172937	1.29079	0.222558
CD8+ T cells_CD45RO	0.0851022	CD8+ T cells	CD45RO	0.67261	1.4305	3.25027	2.3767	1.9312	2.07042	2.19695	3.31985	1.68679	1.94269	2.38279	3.1615	1.95589	2.21687	2.07029	2.04727	3.19641	2.21203	1.844	2.34919	2.48707	1.62084	3.39229
CD8+ T cells_CD49d	0.582738	CD8+ T cells	CD49d	0.67261	1.95328	1.99404	1.71509	1.84338	1.67618	1.60998	2.7944	2.13556	0.989916	1.67697	1.69776	1.90276	1.19908	1.93006	1.43924	2.15331	2.03444	2.12044	1.49472	1.56452	2.17874	2.35549
CD8+ T cells_CD54	0.563406	CD8+ T cells	CD54	0.67261	0.00359999	0.0544731	0.0291959	0.259478	0.0315947	0.133999	0.331874	0.00679995	0.043786	0.0231979	0.282526	0.0163993	0.0757276	0.181797	0.080513	0.613738	0.0101998	0.0721374	0.145783	0.154188	0.596408	0.902986
CD8+ T cells_CD69	0.530223	CD8+ T cells	CD69	0.67261	3.52438	3.44786	3.8547	2.75835	3.85805	3.04001	3.79574	3.90312	3.50356	3.95217	3.46062	3.07695	2.8048	3.53248	2.62335	3.65372	3.56372	3.5604	3.2956	3.85069	2.82742	3.93674
CD8+ T cells_PD1	0.32393	CD8+ T cells	PD1	0.67261	2.51752	2.35877	1.86654	1.4698	2.50961	1.21359	2.74054	1.97551	2.70712	2.24239	2.42805	1.5634	1.56067	1.58485	1.84431	2.35026	1.95039	1.86029	1.34777	0.578234	1.31167	1.67422
CD8+ T cells_Tbet	0.285756	CD8+ T cells	Tbet	0.67261	1.76007	1.90837	2.10244	2.41127	1.55986	1.58533	1.94368	1.68018	1.88797	1.78536	2.10766	1.40967	1.89002	2.29575	1.86961	2.47216	1.79588	1.7723	1.95545	1.85877	2.75116	2.06024
Granulocytes_CD31/PECAM_1	0.797624	Granulocytes	CD31/PECAM_1	0.798544	1.04484	0.980807	0.605346	1.05743	0.790394	0.575331	0.979755	0.470453	0.503903	0.704784	1.30026	0.394674	0.592686	1.20361	0.836263	1.17226	0.913598	0.589804	0.880737	0.692747	1.02267	1.12024
Granulocytes_CD49d	0.798544	Granulocytes	CD49d	0.798544	0.978306	1.01808	0.685128	1.33425	0.929059	0.745501	1.51948	0.822776	1.19265	1.27762	1.30647	0.581134	1.61427	1.11196	1.11333	1.655	1.40986	1.67038	0.946575	1.34376	1.74346	1.46235
Granulocytes_CD54	0.406053	Granulocytes	CD54	0.798544	0.465595	0.346523	0.154781	0.781716	0.32039	0.944211	0.803953	0.513354	0.237851	0.30562	0.58198	1.2852	0.570025	0.869801	0.644126	0.809016	0.464334	0.396156	0.998508	0.553675	0.792876	0.69818
Granulocytes_CD86	0.587121	Granulocytes	CD86	0.798544	0.226654	0.115145	0.146871	0.52837	0.0801143	0.135981	0.54675	0.141725	0.0913728	0.180518	0.286358	0.108586	0.0856951	0.384924	0.36035	0.419029	0.264119	0.0787187	0.283872	0.244167	0.292318	0.44106
Microglia_CD25 (IL_2R)	0.955722	Microglia	CD25 (IL_2R)	0.955722	1.71135	1.00162	0.0667504	0.50222	0.345675	0.565907	1.05308	0.292415	2.09053	0.862009	2.61217	1.85707	0.233473	2.16025	1.26593	1.74295	0.386319	0.354903	0	0.54727	2.05778	2.75978
Microglia_CD31/PECAM_1	0.645793	Microglia	CD31/PECAM_1	0.90411	1.11321	0.761684	0.416089	0.876273	0.685128	0.780354	1.03251	0.322672	0.47978	0.626254	1.22413	0.506115	0.32941	0.646265	0.674807	1.07234	0.694746	0.515291	0.773674	0.745888	1.1304	1.0662
Microglia_CD49d	0.792631	Microglia	CD49d	0.924736	3.15037	2.01293	0.527757	1.48093	1.13914	1.85405	2.07347	1.43776	3.27348	1.78281	3.6298	3.42151	1.04647	3.32565	2.58032	2.85173	1.26153	1.43041	0.187696	1.57814	3.02446	3.93137
Microglia_CD54	0.483866	Microglia	CD54	0.90411	0.514411	0.186517	0.0952559	0.395786	0.268174	0.52548	0.510973	0.166825	0.474404	0.216114	0.955852	0.852949	0.223144	0.333958	0.577722	1.06521	0.260639	0.194766	1.11711	0.448783	1.15621	0.915877
Microglia_CD69	0.512912	Microglia	CD69	0.90411	2.03941	1.8707	1.37846	1.87412	1.10285	1.77937	2.03428	1.06872	1.7664	1.43005	2.51861	0.688019	0.189071	1.14453	0.902429	1.57505	1.17789	1.40912	1.78232	1.49699	2.17327	2.31114
Microglia_CD86	0.611499	Microglia	CD86	0.90411	0.285698	0.390592	0.110177	0.428743	0.261799	0.38418	0.309056	0.27685	0.259865	0.26856	0.81776	0.255801	0.177467	0.308102	0.326185	0.511943	0.387063	0.162287	0.459463	0.275309	0.601978	0.416641
Microglia_PDL1	0.250145	Microglia	PDL1	0.90411	0.239115	0.38297	0.0908749	0.437144	0.104808	0.0953554	0.297397	0.0545729	0.230942	0.181797	0.457114	0.117728	0.0477818	0.219825	0.154386	0.367099	0.133999	0.0679477	0.421416	0.0365918	0.729698	0.380362
Monocytes_CD25 (IL_2R)	0.23974	Monocytes	CD25 (IL_2R)	0.472327	0.549696	0.44606	0.00739993	0.231136	0.756385	0.426364	0.782927	0.0741037	0.573534	0.549522	2.03757	0.74898	0.43386	0.747746	0.136575	0.61009	0.134791	0.325236	0.0271966	0.307401	0.864158	1.47063
Monocytes_CD31/PECAM_1	0.472327	Monocytes	CD31/PECAM_1	0.472327	2.58306	2.60267	2.29838	2.44426	2.10834	2.11165	3.06154	2.2012	2.01555	2.50303	2.34193	1.12963	1.9304	2.30689	2.26126	2.59949	2.99213	2.64262	2.40516	2.5871	2.45676	2.64645
Monocytes_CD36	0.458149	Monocytes	CD36	0.472327	3.64126	4.05844	3.94545	4.12376	3.23571	3.74112	4.44326	3.61798	2.91094	3.32092	4.12	3.05408	3.96899	4.07738	4.10113	4.17295	4.17866	3.20665	3.63474	3.77635	3.98378	4.13961
Monocytes_CD45RA	0.229744	Monocytes	CD45RA	0.472327	0.835971	1.25036	0.685128	0.844267	1.31373	0.922209	1.56484	0.592177	1.02897	1.15953	2.19673	0.761254	1.32808	1.05221	0.52802	1.18665	0.948327	0.661981	0.576698	1.02947	1.28283	1.77348
Monocytes_CD49d	0.467607	Monocytes	CD49d	0.472327	2.49178	2.78544	1.93607	2.33793	2.45083	2.06952	3.02223	2.2313	2.61118	2.44921	4.14316	2.49704	2.84436	2.8808	1.74088	3.26977	2.5028	2.13947	2.2286	1.86964	3.01966	3.46394
Monocytes_CD54	0.151092	Monocytes	CD54	0.472327	1.40792	1.1718	1.53593	1.39604	1.71741	2.19378	1.97458	1.4722	1.10326	0.953169	2.11413	3.19111	1.38611	1.57497	1.38887	2.09501	1.15953	1.37466	2.95338	1.20112	2.11026	2.12287
Monocytes_CD86	0.275455	Monocytes	CD86	0.472327	1.23544	1.42969	1.25469	1.38082	0.275598	0.980281	1.69545	1.06985	0.296917	0.723427	2.50423	0.866467	0.947923	0.897124	0.686735	1.57481	0.900198	0.540844	0.517404	0.561261	1.7622	1.12752
Myeloid_CD25 (IL_2R)	0.949352	Myeloid	CD25 (IL_2R)	0.954213	3.94574	3.93931	3.46488	4.2898	3.91774	3.69131	3.95217	3.73304	4.7178	4.12672	4.19605	4.50975	1.80431	4.58769	3.87706	3.86362	4.08056	3.49341	0.180124	3.81935	4.15181	4.95009
Myeloid_CD31/PECAM_1	0.954213	Myeloid	CD31/PECAM_1	0.954213	2.04105	1.88646	2.41138	1.91871	1.75933	1.78137	2.39671	1.26535	1.32788	1.64916	2.27578	1.40334	1.49195	1.82908	1.32897	2.58564	2.34545	1.82481	1.85902	1.84351	2.31334	1.77144
Myeloid_CD36	0.577015	Myeloid	CD36	0.954213	0.130826	0.110575	0.0643556	0.23717	0.208486	0.0938621	0.224314	0.0758273	0.100431	0.0928665	0.304187	0.130727	0	0.180813	0.0968485	0.246108	0.149443	0.0163993	0.109779	0.045784	0.287234	0.281853
Myeloid_CD49d	0.849212	Myeloid	CD49d	0.954213	5.14168	5.02498	5.07909	5.28825	4.99453	4.99973	5.13501	5.20922	5.66484	5.13886	5.19781	5.6514	3.70148	5.56636	5.03552	5.04328	5.49018	4.93914	1.32927	5.01702	5.11353	5.90118
Myeloid_CD54	0.374171	Myeloid	CD54	0.954213	1.24021	0.710021	1.72086	1.37018	1.18798	1.51918	1.71815	1.36266	1.35654	0.935943	1.89323	1.72894	1.62933	1.0793	1.32778	2.41766	1.48546	1.10702	2.42393	1.65456	2.55166	1.63171
Myeloid_CD69	0.297662	Myeloid	CD69	0.954213	2.88161	2.76179	2.91844	2.68679	1.96269	2.78657	3.10095	2.87539	2.63833	2.46496	2.75405	1.87876	0.123486	1.96098	0.470992	2.65844	2.68447	2.40179	2.80524	2.34285	2.56981	2.69948
Myeloid_CD86	0.861427	Myeloid	CD86	0.954213	0.492275	0.823217	0.501688	0.855039	0.590822	0.640582	0.846587	0.617168	0.628581	0.617168	1.19188	0.492097	0.41756	0.695545	0.576698	1.08998	0.738825	0.388178	0.880383	0.539626	1.26394	0.715239
Myeloid_PDL1	0.202567	Myeloid	PDL1	0.954213	0.289058	0.368409	0.11137	0.507971	0.196336	0.161398	0.307911	0.144497	0.325236	0.304283	0.523289	0.199278	0.0555714	0.314966	0.141923	0.373085	0.165247	0.0854958	0.449781	0.102222	0.816429	0.47978
NK cells_CD25 (IL_2R)	0.705231	NK cells	CD25 (IL_2R)	0.705231	0.874711	0	0	0	0.292798	0.206235	0	0.198297	0	0.0471825	0.203982	0	0.0003	0	0	0.0718381	0	0	0	0	0	0.0554713
NK cells_CD31/PECAM_1	0.00167935	NK cells	CD31/PECAM_1	0.00503806	0.271356	0.151421	0.0316938	0.101426	1.63212	0.911568	0.327608	0.203101	0	0	1.58107	0.186614	0.972386	0.131818	0.0775223	1.48041	0.0663513	0.476485	0.00959985	0.0151994	0.172543	0.0894793
NK cells_CD45RA	0.00870767	NK cells	CD45RA	0.0195923	1.23235	2.57157	2.86259	3.30179	0.941032	1.1814	3.91613	1.12142	3.11837	3.20504	1.2992	1.75699	0.150234	3.25184	2.27913	1.61123	3.56088	2.45999	3.56131	3.92498	3.18636	2.90529
NK cells_CD45RO	0.516485	NK cells	CD45RO	0.581045	0.943151	0.152409	0	0.0817091	0.305238	0.218937	0.315252	0.0809116	0.0843001	0.0970445	0.521446	0.057668	0.0714392	0.125867	0.0799148	0.503637	0.129835	0.157819	0.207801	0	0.339066	0.243099
NK cells_CD49d	0.000627667	NK cells	CD49d	0.0028245	2.3585	2.32095	1.39047	1.8932	4.12265	4.03474	2.24289	3.3578	1.62342	1.83909	4.69766	2.60972	4.84136	1.90872	1.79709	4.32251	1.8277	2.37083	2.14679	1.30457	2.19928	1.95611
NK cells_CD54	0.000438373	NK cells	CD54	0.0028245	0.44969	0.332064	0.0725355	0.252121	2.21104	2.03526	0.457656	0.63372	0.237365	0.187104	2.27052	1.39064	1.61453	0.384831	0.499826	1.80228	0.218849	0.952834	0.47225	0.220411	0.323716	0.472878
NK cells_CD69	0.168391	NK cells	CD69	0.216503	0.224696	1.17834	0.223237	0.310392	0.24203	1.55124	0.650207	0.25554	2.82431	0.631095	0.811689	1.99641	1.24629	1.05221	0.814274	0.737968	1.58909	0.458739	3.19578	0.240087	0.601641	1.01559
NK cells_PDL1	0.145483	NK cells	PDL1	0.216503	0.376813	0.104808	0.0005	0.0924682	0.175892	0.147168	0.14123	0.109381	0.0215983	0.108388	0.262186	0.193687	0.130727	0.0478817	0	0.322386	0	0.0589657	0.137665	0.0016	0.157745	0.107486
NK cells_Tbet	0.019449	NK cells	Tbet	0.0350082	0	3.29561	3.73019	3.71685	0.268753	0.718299	4.10162	0.366104	3.12314	3.5259	1.23727	1.48515	0.187498	3.84635	2.50257	1.50649	3.13505	1.07351	3.51726	3.40653	3.99533	3.67435
Undefined_CD25 (IL_2R)	0.497628	Undefined	CD25 (IL_2R)	0.730601	3.58392	3.41	2.7165	3.25913	3.38413	3.54916	3.42338	3.4187	3.74537	3.62214	3.67373	3.58492	3.13935	3.79602	3.64049	3.40636	3.50111	3.56255	0.0687458	3.44151	3.49091	3.79913
Undefined_CD31/PECAM_1	0.730601	Undefined	CD31/PECAM_1	0.730601	0.660758	0.30982	0.342466	0.435502	0.313919	0.184157	0.550561	0.0360922	0.116139	0.220997	0.415722	0.0799149	0.171754	0.195551	0.126463	0.675292	0.482642	0.156757	0.397082	0.393932	0.642149	0.188286
Undefined_CD45RA	0.725354	Undefined	CD45RA	0.730601	2.54508	2.46732	1.75128	2.41596	2.25467	2.33421	2.44674	2.42194	2.82924	2.69648	2.84868	2.44632	2.24414	2.95311	2.59111	2.52532	2.49941	2.547	0.160112	2.25992	2.60752	2.99201
Undefined_CD45RO	0.475251	Undefined	CD45RO	0.730601	0.153299	0.15231	0.203982	0.140933	0.245623	0.127653	0.234641	0.0328941	0.0505784	0.0455842	0.103018	0.0311949	0.0933639	0.130232	0.0317946	0.366724	0.230747	0.0371913	0.665817	0.111568	0.375886	0.109879
Undefined_CD49d	0.550898	Undefined	CD49d	0.730601	4.09596	3.86028	3.41757	3.77206	3.83904	3.85341	3.80575	3.83659	4.24156	3.99791	4.1552	4.07626	3.9315	4.28279	4.10614	3.88597	4.11041	4.01855	0.406075	3.88451	3.86879	4.32387
Undefined_CD54	0.575486	Undefined	CD54	0.730601	0	0	0	0.002	0	0	0.0295957	0	0	0	0.0336936	0	0	0	0	0.239698	0	0	0.508502	0.0371914	0.321056	0
Undefined_CD69	0.294454	Undefined	CD69	0.730601	0.391984	0.198102	0.443334	0.297205	0.0341933	0.154584	0.327893	0.113357	0.186124	0.15814	0.419397	0	0	0.0026	0	0.0469827	0.157745	0.251539	1.01358	0.237365	0.219044	0.0767247
Undefined_FoxP3	0.100794	Undefined	FoxP3	0.730601	0.284641	0.492186	0.152014	0.0886837	0.0987395	0	0.00799991	0.0328941	0.161694	0.117926	0.285121	0	0	0	0	0.0639564	0	0.0264969	0.639269	0.0419877	0.212204	0
Undefined_Gata3	0.470589	Undefined	Gata3	0.730601	0.0547726	0.189857	0.188089	0.315347	0.282911	0.145288	0.18042	0.17067	0.159523	0.154188	0	0.142715	0.169485	0.0427869	0.108189	0.324096	0.154781	0.0538739	1.09298	0.130033	0.248049	0.0345931
Septum general populations; ADvsCon	p_val	cluster_id	marker_id	p_adj	control01	control02	ad02	control07	ms02	ms03	ms09	ms04	control03	ad03	ms05	ms07	ms12	control06	ms08	ms10	control08	control11	control09	ad04	control10	ad07
B cell lineage_CD25 (IL_2R)	0.000974204	B cell lineage	CD25 (IL_2R)	0.00463596	0.0665508	0.271068	1.1585	3.35097	1.17361	0.517578	0.346408	3.64447	1.15802	3.97559	0.980413	3.64596	2.18035	0.2496	0.344444	0.662301	0.648073	0.142613	0	3.42744	0.546596	3.77554
B cell lineage_CD31/PECAM_1	0.179301	B cell lineage	CD31/PECAM_1	0.268952	0.40125	0.12805	0.147663	0.76282	0.0852965	0.160014	0.33604	0	0.12069	0.0830904	0.373271	0.0301954	0.0803136	0.285313	0.0770211	0.56023	0.241253	0.108089	0.085713	0.0549723	0.234154	0.180223
B cell lineage_CD45RA	0.291117	B cell lineage	CD45RA	0.3619	3.95797	3.70775	4.27113	3.75102	3.87726	3.84425	4.36611	3.92906	3.57512	3.7681	4.0676	3.85449	4.04099	4.58022	4.182	4.85098	4.15075	4.40424	4.26907	3.61697	4.05488	3.79917
B cell lineage_CD45RO	0.834485	B cell lineage	CD45RO	0.834485	0.0872833	0.107195	0.00619996	0.358285	0.032994	0.0112998	0.174802	0	0	0.253471	0.332821	0.0239977	0.1062	0.119317	0.0928665	0.272692	0.00619996	0.0126997	0.187989	0.0297956	0.357534	0.289921
B cell lineage_CD49d	0.00103021	B cell lineage	CD49d	0.00463596	2.02958	2.5678	3.11051	4.41693	2.88757	2.76649	2.55401	4.48741	2.33589	4.83767	3.56243	4.75367	4.42362	2.53194	2.29007	2.66155	2.58309	2.4162	2.28488	4.47032	2.97584	4.78593
B cell lineage_CD54	0.0737037	B cell lineage	CD54	0.165833	0.414342	0.187892	0.24669	0.753402	0.132214	0.513484	0.807624	0	0.193686	0.0784192	0.876841	0.156362	0.0413882	0.618922	0.424894	0.654794	0.385947	0.189746	0.9018	0.264891	1.08778	0.185927
B cell lineage_CD69	0.321689	B cell lineage	CD69	0.3619	0.376602	0.223339	0.1613	0	0.109183	0.528839	0.260225	0	0.0129985	0	0.419029	0	0.154781	0.319915	0	0.866991	0	2.11082	0.147494	0	0.247854	0
B cell lineage_FoxP3	0.0137873	B cell lineage	FoxP3	0.0413618	1.80733	2.38568	0.986188	1.18745	1.58894	1.30445	1.86881	1.04269	1.82189	0.904074	1.50362	0.755	0.163668	1.39024	1.02018	0.981394	1.22294	0.770839	1.70566	1.12993	1.81436	0.676101
B cell lineage_Tbet	0.120549	B cell lineage	Tbet	0.216989	0.158825	0.732824	0.392448	0.223334	0	0.143306	0.870402	0	0	0	0.262766	0	0.0131996	0.814653	0.123486	0.645191	0.18101	0	1.945	0.0189989	0.461733	0
CD4+ T cells_CD25 (IL_2R)	0.496932	CD4+ T cells	CD25 (IL_2R)	0.851884	0	0	0	0	0.210932	0.0972467	0.132809	0.036292	0	0.0677482	0.238726	0	0	0.0727358	0	0.123883	0.202807	0.0221982	0.0756278	0	0.00479998	0.27993
CD4+ T cells_CD28	0.461976	CD4+ T cells	CD28	0.851884	0.705422	0.510267	0.460995	0.963201	0.920147	0.667025	1.5155	0.851072	0.503814	0.972364	0.915325	0.695865	0.40937	1.41354	0.749137	0.593363	0.983304	0.644949	0.799173	0.470094	0.554624	0.47503
CD4+ T cells_CD31/PECAM_1	0.86651	CD4+ T cells	CD31/PECAM_1	0.93505	0.00559997	0	0.00739993	0.093663	0.0850973	0	0.192214	0	0.0587662	0.137566	0.0265969	0	0.00869989	0.140735	0.0129996	0.178451	0.445878	0.190054	0.0536742	0.268367	0.126463	0.0553717
CD4+ T cells_CD45RA	0.257942	CD4+ T cells	CD45RA	0.851884	0.210248	0.289537	0.156065	0.20692	0.417463	0.200063	0.414066	0.129438	0.258511	0.394118	0.251151	0.129637	0.0142995	0.368784	0.15063	0.133305	0.719023	0.267209	0.104211	0.18101	0.723899	0.151124
CD4+ T cells_CD45RO	0.0917809	CD4+ T cells	CD45RO	0.550685	2.51897	3.22696	2.80614	2.90266	2.7054	2.79398	3.64738	2.68954	2.90877	2.97595	3.24369	3.03325	2.86535	2.49686	2.70136	3.50013	2.6354	2.69956	3.16694	3.21367	2.55548	3.62324
CD4+ T cells_CD49d	0.777602	CD4+ T cells	CD49d	0.93505	1.56956	1.7649	1.81946	2.00184	1.43808	1.58964	2.50844	2.17541	0.959063	1.57712	1.33341	1.56284	0.924676	1.93091	1.34752	1.88682	2.3027	1.95401	1.21484	1.82419	2.35156	1.79089
CD4+ T cells_CD54	0.866232	CD4+ T cells	CD54	0.93505	0	0.0306952	0	0.095455	0.0121997	0.0371914	0.124875	0	0.041588	0	0.102023	0	0	0.110376	0.0763259	0.313823	0.084898	0.0109998	0.113456	0.0932647	0.346806	0.313347
CD4+ T cells_CD69	0.0299706	CD4+ T cells	CD69	0.359647	3.09403	3.45205	2.82836	2.73238	3.49545	3.15791	3.1103	3.54874	3.12525	3.86285	2.64486	2.94208	1.82119	3.1584	2.39147	3.26244	3.22894	3.09657	3.34767	3.7488	2.35436	3.66656
CD4+ T cells_FoxP3	0.93505	CD4+ T cells	FoxP3	0.93505	1.14285	1.58127	0.695385	0.899639	1.05344	0.554366	1.11178	0.991547	0.743563	1.34401	0.969317	0.318013	0.0406888	0.436414	0.389664	0.529245	0.804102	0.331685	0.643632	0.554711	0.942657	0.518986
CD4+ T cells_Gata3	0.361794	CD4+ T cells	Gata3	0.851884	0.615244	1.02535	0.40771	0.852805	0.558508	0.710813	1.02618	0.624091	0.572423	0.70272	1.0207	0.43933	0.165543	0.744338	0.468295	1.29757	0.825718	0.522675	0.633888	0.641654	1.27736	0.808272
CD4+ T cells_PD1	0.381312	CD4+ T cells	PD1	0.851884	0.789265	2.0387	1.01322	1.76826	1.64597	1.37978	1.86254	0.877335	2.80571	2.15069	1.35703	1.53979	1.42624	0.963201	1.64537	2.49414	0.752688	1.37256	2.06016	1.75107	1.14093	2.10264
CD4+ T cells_Tbet	0.720382	CD4+ T cells	Tbet	0.93505	1.64894	1.83464	1.80726	2.17794	1.03705	1.37618	1.53115	1.20355	1.48361	1.65035	1.9879	1.38215	0.989981	1.86042	1.58949	2.18815	0.768645	1.15518	1.70981	1.59784	2.52982	1.47638
CD45-_CD25 (IL_2R)	0.770152	CD45-	CD25 (IL_2R)	0.857258	0.955584	1.70584	2.17183	2.06224	1.43484	1.01085	0.859106	2.1116	1.87124	1.74438	1.49302	0.586749	2.16205	0.513001	0.435316	1.36874	1.99348	0.244167	0	0.771378	1.8764	1.68054
CD45-_CD31/PECAM_1	0.43696	CD45-	CD31/PECAM_1	0.857258	0	0.0168991	0.0443854	0.173922	0	0.0092998	0.0514773	0	0	0	0	0	0.00929986	0	0	0.156658	0.0701425	0.111767	0	0.0370863	0.239115	0.0762261
CD45-_CD45RA	0.670747	CD45-	CD45RA	0.857258	1.04934	1.75624	2.06424	2.04643	1.17733	2.07492	1.97072	2.25404	2.08266	1.58674	1.28356	0.766048	2.03018	0.771542	1.32327	1.60973	2.221	2.41812	0.629909	1.12529	2.13602	1.73645
CD45-_CD45RO	0.659845	CD45-	CD45RO	0.857258	0.629079	0.149641	0	0.0138996	0.23717	0.0721368	0.483608	0.0028	0.0008	0.442243	0.597335	0.218849	0	0.564876	0.188875	0.243677	0	0.318774	0.111568	0.203191	0.259276	0.253864
CD45-_CD49d	0.400257	CD45-	CD49d	0.857258	2.26495	2.80326	3.20886	3.01278	2.69082	2.63467	2.78946	3.11798	2.88343	2.97835	2.74352	1.84017	3.24446	1.43529	1.91335	2.58165	3.08782	2.11954	0.582326	2.34043	2.98752	2.77808
CD45-_CD54	0.857258	CD45-	CD54	0.857258	0.136575	0.00909987	0	0	0.0902773	0.21288	0.810277	0	0	0.133999	0.373363	0	0	0.0635572	0.244651	0.11276	0	0.203003	0.233668	0.060063	0.107294	0.0982406
CD45-_FoxP3	0.58048	CD45-	FoxP3	0.857258	2.45608	1.76583	0.566938	1.32882	1.65942	0.443864	1.54878	0.516876	1.07613	1.98099	2.71339	0.988151	0.357063	1.72155	0.497963	0.706532	0.528632	0.411305	1.45918	0.322512	1.46494	1.15317
CD45-_Gata3	0.336844	CD45-	Gata3	0.857258	0.0611619	0.163175	0.107195	0.0969481	0.0211984	0.181698	0.34558	0.0549723	0.0649543	0.0357924	0.0725364	0	0.0434863	0.0195987	0.118621	0.283005	0.0878868	0.505938	0.322196	0.0524757	0.109877	0.0742318
CD45-_PDL1	0.548651	CD45-	PDL1	0.857258	0.263925	0.356312	0.181403	0.296439	0.388178	0.198298	0.342183	0.273575	0.312489	0.332821	0.499294	0.0597644	0.120307	0.112761	0.144101	0.346615	0.17274	0.180616	0	0.0406875	0.350728	0.163865
CD8+ T cells_CD25 (IL_2R)	0.174073	CD8+ T cells	CD25 (IL_2R)	0.45759	0	0	0	0	0.0251973	0	0	0.018399	0	0.0319945	0.0801143	0	0	0.156658	0	0.132512	0	0	0	0	0.00439999	0.420865
CD8+ T cells_CD31/PECAM_1	0.566805	CD8+ T cells	CD31/PECAM_1	0.681584	0.0006	0.361007	0.277813	0.30982	0.128447	0.230552	0.72217	0.103217	0.0139995	0.128645	0.253768	0.0129996	0	0.312585	0.155374	0.331495	0.137566	0.167811	0.248824	0.052376	0.425357	0.322386
CD8+ T cells_CD45RA	0.203373	CD8+ T cells	CD45RA	0.45759	0.456752	0.271743	0.0671495	0.311536	0.231526	0.274538	0.469554	0.133701	0.223143	0.304092	0.294619	0.130826	0.00719994	0.34275	0.185337	0.182879	0.233084	0.310201	0.272514	0.172937	1.29079	0.222558
CD8+ T cells_CD45RO	0.169981	CD8+ T cells	CD45RO	0.45759	1.4305	3.25027	2.3767	1.9312	2.07042	2.19695	3.31985	1.68679	1.94269	2.38279	3.1615	1.95589	2.21687	2.07029	2.04727	3.19641	2.21203	1.844	2.34919	2.48707	1.62084	3.39229
CD8+ T cells_CD49d	0.880024	CD8+ T cells	CD49d	0.880024	1.95328	1.99404	1.71509	1.84338	1.67618	1.60998	2.7944	2.13556	0.989916	1.67697	1.69776	1.90276	1.19908	1.93006	1.43924	2.15331	2.03444	2.12044	1.49472	1.56452	2.17874	2.35549
CD8+ T cells_CD54	0.605852	CD8+ T cells	CD54	0.681584	0.00359999	0.0544731	0.0291959	0.259478	0.0315947	0.133999	0.331874	0.00679995	0.043786	0.0231979	0.282526	0.0163993	0.0757276	0.181797	0.080513	0.613738	0.0101998	0.0721374	0.145783	0.154188	0.596408	0.902986
CD8+ T cells_CD69	0.0178518	CD8+ T cells	CD69	0.160667	3.52438	3.44786	3.8547	2.75835	3.85805	3.04001	3.79574	3.90312	3.50356	3.95217	3.46062	3.07695	2.8048	3.53248	2.62335	3.65372	3.56372	3.5604	3.2956	3.85069	2.82742	3.93674
CD8+ T cells_PD1	0.357463	CD8+ T cells	PD1	0.536194	2.51752	2.35877	1.86654	1.4698	2.50961	1.21359	2.74054	1.97551	2.70712	2.24239	2.42805	1.5634	1.56067	1.58485	1.84431	2.35026	1.95039	1.86029	1.34777	0.578234	1.31167	1.67422
CD8+ T cells_Tbet	0.347182	CD8+ T cells	Tbet	0.536194	1.76007	1.90837	2.10244	2.41127	1.55986	1.58533	1.94368	1.68018	1.88797	1.78536	2.10766	1.40967	1.89002	2.29575	1.86961	2.47216	1.79588	1.7723	1.95545	1.85877	2.75116	2.06024
Granulocytes_CD31/PECAM_1	0.325235	Granulocytes	CD31/PECAM_1	0.650469	1.04484	0.980807	0.605346	1.05743	0.790394	0.575331	0.979755	0.470453	0.503903	0.704784	1.30026	0.394674	0.592686	1.20361	0.836263	1.17226	0.913598	0.589804	0.880737	0.692747	1.02267	1.12024
Granulocytes_CD49d	0.954591	Granulocytes	CD49d	0.954591	0.978306	1.01808	0.685128	1.33425	0.929059	0.745501	1.51948	0.822776	1.19265	1.27762	1.30647	0.581134	1.61427	1.11196	1.11333	1.655	1.40986	1.67038	0.946575	1.34376	1.74346	1.46235
Granulocytes_CD54	0.30446	Granulocytes	CD54	0.650469	0.465595	0.346523	0.154781	0.781716	0.32039	0.944211	0.803953	0.513354	0.237851	0.30562	0.58198	1.2852	0.570025	0.869801	0.644126	0.809016	0.464334	0.396156	0.998508	0.553675	0.792876	0.69818
Granulocytes_CD86	0.896184	Granulocytes	CD86	0.954591	0.226654	0.115145	0.146871	0.52837	0.0801143	0.135981	0.54675	0.141725	0.0913728	0.180518	0.286358	0.108586	0.0856951	0.384924	0.36035	0.419029	0.264119	0.0787187	0.283872	0.244167	0.292318	0.44106
Microglia_CD25 (IL_2R)	0.710078	Microglia	CD25 (IL_2R)	0.831748	1.71135	1.00162	0.0667504	0.50222	0.345675	0.565907	1.05308	0.292415	2.09053	0.862009	2.61217	1.85707	0.233473	2.16025	1.26593	1.74295	0.386319	0.354903	0	0.54727	2.05778	2.75978
Microglia_CD31/PECAM_1	0.718908	Microglia	CD31/PECAM_1	0.831748	1.11321	0.761684	0.416089	0.876273	0.685128	0.780354	1.03251	0.322672	0.47978	0.626254	1.22413	0.506115	0.32941	0.646265	0.674807	1.07234	0.694746	0.515291	0.773674	0.745888	1.1304	1.0662
Microglia_CD49d	0.684636	Microglia	CD49d	0.831748	3.15037	2.01293	0.527757	1.48093	1.13914	1.85405	2.07347	1.43776	3.27348	1.78281	3.6298	3.42151	1.04647	3.32565	2.58032	2.85173	1.26153	1.43041	0.187696	1.57814	3.02446	3.93137
Microglia_CD54	0.629943	Microglia	CD54	0.831748	0.514411	0.186517	0.0952559	0.395786	0.268174	0.52548	0.510973	0.166825	0.474404	0.216114	0.955852	0.852949	0.223144	0.333958	0.577722	1.06521	0.260639	0.194766	1.11711	0.448783	1.15621	0.915877
Microglia_CD69	0.831748	Microglia	CD69	0.831748	2.03941	1.8707	1.37846	1.87412	1.10285	1.77937	2.03428	1.06872	1.7664	1.43005	2.51861	0.688019	0.189071	1.14453	0.902429	1.57505	1.17789	1.40912	1.78232	1.49699	2.17327	2.31114
Microglia_CD86	0.311203	Microglia	CD86	0.831748	0.285698	0.390592	0.110177	0.428743	0.261799	0.38418	0.309056	0.27685	0.259865	0.26856	0.81776	0.255801	0.177467	0.308102	0.326185	0.511943	0.387063	0.162287	0.459463	0.275309	0.601978	0.416641
Microglia_PDL1	0.134715	Microglia	PDL1	0.831748	0.239115	0.38297	0.0908749	0.437144	0.104808	0.0953554	0.297397	0.0545729	0.230942	0.181797	0.457114	0.117728	0.0477818	0.219825	0.154386	0.367099	0.133999	0.0679477	0.421416	0.0365918	0.729698	0.380362
Monocytes_CD25 (IL_2R)	0.677097	Monocytes	CD25 (IL_2R)	0.820507	0.549696	0.44606	0.00739993	0.231136	0.756385	0.426364	0.782927	0.0741037	0.573534	0.549522	2.03757	0.74898	0.43386	0.747746	0.136575	0.61009	0.134791	0.325236	0.0271966	0.307401	0.864158	1.47063
Monocytes_CD31/PECAM_1	0.836077	Monocytes	CD31/PECAM_1	0.836077	2.58306	2.60267	2.29838	2.44426	2.10834	2.11165	3.06154	2.2012	2.01555	2.50303	2.34193	1.12963	1.9304	2.30689	2.26126	2.59949	2.99213	2.64262	2.40516	2.5871	2.45676	2.64645
Monocytes_CD36	0.703292	Monocytes	CD36	0.820507	3.64126	4.05844	3.94545	4.12376	3.23571	3.74112	4.44326	3.61798	2.91094	3.32092	4.12	3.05408	3.96899	4.07738	4.10113	4.17295	4.17866	3.20665	3.63474	3.77635	3.98378	4.13961
Monocytes_CD45RA	0.472064	Monocytes	CD45RA	0.820507	0.835971	1.25036	0.685128	0.844267	1.31373	0.922209	1.56484	0.592177	1.02897	1.15953	2.19673	0.761254	1.32808	1.05221	0.52802	1.18665	0.948327	0.661981	0.576698	1.02947	1.28283	1.77348
Monocytes_CD49d	0.593157	Monocytes	CD49d	0.820507	2.49178	2.78544	1.93607	2.33793	2.45083	2.06952	3.02223	2.2313	2.61118	2.44921	4.14316	2.49704	2.84436	2.8808	1.74088	3.26977	2.5028	2.13947	2.2286	1.86964	3.01966	3.46394
Monocytes_CD54	0.526892	Monocytes	CD54	0.820507	1.40792	1.1718	1.53593	1.39604	1.71741	2.19378	1.97458	1.4722	1.10326	0.953169	2.11413	3.19111	1.38611	1.57497	1.38887	2.09501	1.15953	1.37466	2.95338	1.20112	2.11026	2.12287
Monocytes_CD86	0.559704	Monocytes	CD86	0.820507	1.23544	1.42969	1.25469	1.38082	0.275598	0.980281	1.69545	1.06985	0.296917	0.723427	2.50423	0.866467	0.947923	0.897124	0.686735	1.57481	0.900198	0.540844	0.517404	0.561261	1.7622	1.12752
Myeloid_CD25 (IL_2R)	0.683859	Myeloid	CD25 (IL_2R)	0.908428	3.94574	3.93931	3.46488	4.2898	3.91774	3.69131	3.95217	3.73304	4.7178	4.12672	4.19605	4.50975	1.80431	4.58769	3.87706	3.86362	4.08056	3.49341	0.180124	3.81935	4.15181	4.95009
Myeloid_CD31/PECAM_1	0.701308	Myeloid	CD31/PECAM_1	0.908428	2.04105	1.88646	2.41138	1.91871	1.75933	1.78137	2.39671	1.26535	1.32788	1.64916	2.27578	1.40334	1.49195	1.82908	1.32897	2.58564	2.34545	1.82481	1.85902	1.84351	2.31334	1.77144
Myeloid_CD36	0.407694	Myeloid	CD36	0.908428	0.130826	0.110575	0.0643556	0.23717	0.208486	0.0938621	0.224314	0.0758273	0.100431	0.0928665	0.304187	0.130727	0	0.180813	0.0968485	0.246108	0.149443	0.0163993	0.109779	0.045784	0.287234	0.281853
Myeloid_CD49d	0.614062	Myeloid	CD49d	0.908428	5.14168	5.02498	5.07909	5.28825	4.99453	4.99973	5.13501	5.20922	5.66484	5.13886	5.19781	5.6514	3.70148	5.56636	5.03552	5.04328	5.49018	4.93914	1.32927	5.01702	5.11353	5.90118
Myeloid_CD54	0.803568	Myeloid	CD54	0.908428	1.24021	0.710021	1.72086	1.37018	1.18798	1.51918	1.71815	1.36266	1.35654	0.935943	1.89323	1.72894	1.62933	1.0793	1.32778	2.41766	1.48546	1.10702	2.42393	1.65456	2.55166	1.63171
Myeloid_CD69	0.908428	Myeloid	CD69	0.908428	2.88161	2.76179	2.91844	2.68679	1.96269	2.78657	3.10095	2.87539	2.63833	2.46496	2.75405	1.87876	0.123486	1.96098	0.470992	2.65844	2.68447	2.40179	2.80524	2.34285	2.56981	2.69948
Myeloid_CD86	0.213524	Myeloid	CD86	0.908428	0.492275	0.823217	0.501688	0.855039	0.590822	0.640582	0.846587	0.617168	0.628581	0.617168	1.19188	0.492097	0.41756	0.695545	0.576698	1.08998	0.738825	0.388178	0.880383	0.539626	1.26394	0.715239
Myeloid_PDL1	0.24128	Myeloid	PDL1	0.908428	0.289058	0.368409	0.11137	0.507971	0.196336	0.161398	0.307911	0.144497	0.325236	0.304283	0.523289	0.199278	0.0555714	0.314966	0.141923	0.373085	0.165247	0.0854958	0.449781	0.102222	0.816429	0.47978
NK cells_CD25 (IL_2R)	0.697662	NK cells	CD25 (IL_2R)	0.716451	0.874711	0	0	0	0.292798	0.206235	0	0.198297	0	0.0471825	0.203982	0	0.0003	0	0	0.0718381	0	0	0	0	0	0.0554713
NK cells_CD31/PECAM_1	0.698442	NK cells	CD31/PECAM_1	0.716451	0.271356	0.151421	0.0316938	0.101426	1.63212	0.911568	0.327608	0.203101	0	0	1.58107	0.186614	0.972386	0.131818	0.0775223	1.48041	0.0663513	0.476485	0.00959985	0.0151994	0.172543	0.0894793
NK cells_CD45RA	0.553379	NK cells	CD45RA	0.716451	1.23235	2.57157	2.86259	3.30179	0.941032	1.1814	3.91613	1.12142	3.11837	3.20504	1.2992	1.75699	0.150234	3.25184	2.27913	1.61123	3.56088	2.45999	3.56131	3.92498	3.18636	2.90529
NK cells_CD45RO	0.284039	NK cells	CD45RO	0.716451	0.943151	0.152409	0	0.0817091	0.305238	0.218937	0.315252	0.0809116	0.0843001	0.0970445	0.521446	0.057668	0.0714392	0.125867	0.0799148	0.503637	0.129835	0.157819	0.207801	0	0.339066	0.243099
NK cells_CD49d	0.405828	NK cells	CD49d	0.716451	2.3585	2.32095	1.39047	1.8932	4.12265	4.03474	2.24289	3.3578	1.62342	1.83909	4.69766	2.60972	4.84136	1.90872	1.79709	4.32251	1.8277	2.37083	2.14679	1.30457	2.19928	1.95611
NK cells_CD54	0.716451	NK cells	CD54	0.716451	0.44969	0.332064	0.0725355	0.252121	2.21104	2.03526	0.457656	0.63372	0.237365	0.187104	2.27052	1.39064	1.61453	0.384831	0.499826	1.80228	0.218849	0.952834	0.47225	0.220411	0.323716	0.472878
NK cells_CD69	0.11697	NK cells	CD69	0.716451	0.224696	1.17834	0.223237	0.310392	0.24203	1.55124	0.650207	0.25554	2.82431	0.631095	0.811689	1.99641	1.24629	1.05221	0.814274	0.737968	1.58909	0.458739	3.19578	0.240087	0.601641	1.01559
NK cells_PDL1	0.523653	NK cells	PDL1	0.716451	0.376813	0.104808	0.0005	0.0924682	0.175892	0.147168	0.14123	0.109381	0.0215983	0.108388	0.262186	0.193687	0.130727	0.0478817	0	0.322386	0	0.0589657	0.137665	0.0016	0.157745	0.107486
NK cells_Tbet	0.531727	NK cells	Tbet	0.716451	0	3.29561	3.73019	3.71685	0.268753	0.718299	4.10162	0.366104	3.12314	3.5259	1.23727	1.48515	0.187498	3.84635	2.50257	1.50649	3.13505	1.07351	3.51726	3.40653	3.99533	3.67435
Undefined_CD25 (IL_2R)	0.622718	Undefined	CD25 (IL_2R)	0.723684	3.58392	3.41	2.7165	3.25913	3.38413	3.54916	3.42338	3.4187	3.74537	3.62214	3.67373	3.58492	3.13935	3.79602	3.64049	3.40636	3.50111	3.56255	0.0687458	3.44151	3.49091	3.79913
Undefined_CD31/PECAM_1	0.434549	Undefined	CD31/PECAM_1	0.723684	0.660758	0.30982	0.342466	0.435502	0.313919	0.184157	0.550561	0.0360922	0.116139	0.220997	0.415722	0.0799149	0.171754	0.195551	0.126463	0.675292	0.482642	0.156757	0.397082	0.393932	0.642149	0.188286
Undefined_CD45RA	0.812671	Undefined	CD45RA	0.812671	2.54508	2.46732	1.75128	2.41596	2.25467	2.33421	2.44674	2.42194	2.82924	2.69648	2.84868	2.44632	2.24414	2.95311	2.59111	2.52532	2.49941	2.547	0.160112	2.25992	2.60752	2.99201
Undefined_CD45RO	0.224907	Undefined	CD45RO	0.723684	0.153299	0.15231	0.203982	0.140933	0.245623	0.127653	0.234641	0.0328941	0.0505784	0.0455842	0.103018	0.0311949	0.0933639	0.130232	0.0317946	0.366724	0.230747	0.0371913	0.665817	0.111568	0.375886	0.109879
Undefined_CD49d	0.640826	Undefined	CD49d	0.723684	4.09596	3.86028	3.41757	3.77206	3.83904	3.85341	3.80575	3.83659	4.24156	3.99791	4.1552	4.07626	3.9315	4.28279	4.10614	3.88597	4.11041	4.01855	0.406075	3.88451	3.86879	4.32387
Undefined_CD54	0.370939	Undefined	CD54	0.723684	0	0	0	0.002	0	0	0.0295957	0	0	0	0.0336936	0	0	0	0	0.239698	0	0	0.508502	0.0371914	0.321056	0
Undefined_CD69	0.643275	Undefined	CD69	0.723684	0.391984	0.198102	0.443334	0.297205	0.0341933	0.154584	0.327893	0.113357	0.186124	0.15814	0.419397	0	0	0.0026	0	0.0469827	0.157745	0.251539	1.01358	0.237365	0.219044	0.0767247
Undefined_FoxP3	0.215694	Undefined	FoxP3	0.723684	0.284641	0.492186	0.152014	0.0886837	0.0987395	0	0.00799991	0.0328941	0.161694	0.117926	0.285121	0	0	0	0	0.0639564	0	0.0264969	0.639269	0.0419877	0.212204	0
Undefined_Gata3	0.388357	Undefined	Gata3	0.723684	0.0547726	0.189857	0.188089	0.315347	0.282911	0.145288	0.18042	0.17067	0.159523	0.154188	0	0.142715	0.169485	0.0427869	0.108189	0.324096	0.154781	0.0538739	1.09298	0.130033	0.248049	0.0345931
Septum general populations; ADvsMS	p_val	cluster_id	marker_id	p_adj	control01	control02	ad02	control07	ms02	ms03	ms09	ms04	control03	ad03	ms05	ms07	ms12	control06	ms08	ms10	control08	control11	control09	ad04	control10	ad07
B cell lineage_CD25 (IL_2R)	0.00457028	B cell lineage	CD25 (IL_2R)	0.0411325	0.0665508	0.271068	1.1585	3.35097	1.17361	0.517578	0.346408	3.64447	1.15802	3.97559	0.980413	3.64596	2.18035	0.2496	0.344444	0.662301	0.648073	0.142613	0	3.42744	0.546596	3.77554
B cell lineage_CD31/PECAM_1	0.254834	B cell lineage	CD31/PECAM_1	0.327644	0.40125	0.12805	0.147663	0.76282	0.0852965	0.160014	0.33604	0	0.12069	0.0830904	0.373271	0.0301954	0.0803136	0.285313	0.0770211	0.56023	0.241253	0.108089	0.085713	0.0549723	0.234154	0.180223
B cell lineage_CD45RA	0.0703841	B cell lineage	CD45RA	0.211152	3.95797	3.70775	4.27113	3.75102	3.87726	3.84425	4.36611	3.92906	3.57512	3.7681	4.0676	3.85449	4.04099	4.58022	4.182	4.85098	4.15075	4.40424	4.26907	3.61697	4.05488	3.79917
B cell lineage_CD45RO	0.91474	B cell lineage	CD45RO	0.91474	0.0872833	0.107195	0.00619996	0.358285	0.032994	0.0112998	0.174802	0	0	0.253471	0.332821	0.0239977	0.1062	0.119317	0.0928665	0.272692	0.00619996	0.0126997	0.187989	0.0297956	0.357534	0.289921
B cell lineage_CD49d	0.00947005	B cell lineage	CD49d	0.0426152	2.02958	2.5678	3.11051	4.41693	2.88757	2.76649	2.55401	4.48741	2.33589	4.83767	3.56243	4.75367	4.42362	2.53194	2.29007	2.66155	2.58309	2.4162	2.28488	4.47032	2.97584	4.78593
B cell lineage_CD54	0.107941	B cell lineage	CD54	0.242867	0.414342	0.187892	0.24669	0.753402	0.132214	0.513484	0.807624	0	0.193686	0.0784192	0.876841	0.156362	0.0413882	0.618922	0.424894	0.654794	0.385947	0.189746	0.9018	0.264891	1.08778	0.185927
B cell lineage_CD69	0.241752	B cell lineage	CD69	0.327644	0.376602	0.223339	0.1613	0	0.109183	0.528839	0.260225	0	0.0129985	0	0.419029	0	0.154781	0.319915	0	0.866991	0	2.11082	0.147494	0	0.247854	0
B cell lineage_FoxP3	0.227519	B cell lineage	FoxP3	0.327644	1.80733	2.38568	0.986188	1.18745	1.58894	1.30445	1.86881	1.04269	1.82189	0.904074	1.50362	0.755	0.163668	1.39024	1.02018	0.981394	1.22294	0.770839	1.70566	1.12993	1.81436	0.676101
B cell lineage_Tbet	0.354108	B cell lineage	Tbet	0.398372	0.158825	0.732824	0.392448	0.223334	0	0.143306	0.870402	0	0	0	0.262766	0	0.0131996	0.814653	0.123486	0.645191	0.18101	0	1.945	0.0189989	0.461733	0
CD4+ T cells_CD25 (IL_2R)	0.586849	CD4+ T cells	CD25 (IL_2R)	0.994227	0	0	0	0	0.210932	0.0972467	0.132809	0.036292	0	0.0677482	0.238726	0	0	0.0727358	0	0.123883	0.202807	0.0221982	0.0756278	0	0.00479998	0.27993
CD4+ T cells_CD28	0.269374	CD4+ T cells	CD28	0.994227	0.705422	0.510267	0.460995	0.963201	0.920147	0.667025	1.5155	0.851072	0.503814	0.972364	0.915325	0.695865	0.40937	1.41354	0.749137	0.593363	0.983304	0.644949	0.799173	0.470094	0.554624	0.47503
CD4+ T cells_CD31/PECAM_1	0.396822	CD4+ T cells	CD31/PECAM_1	0.994227	0.00559997	0	0.00739993	0.093663	0.0850973	0	0.192214	0	0.0587662	0.137566	0.0265969	0	0.00869989	0.140735	0.0129996	0.178451	0.445878	0.190054	0.0536742	0.268367	0.126463	0.0553717
CD4+ T cells_CD45RA	0.854307	CD4+ T cells	CD45RA	0.994227	0.210248	0.289537	0.156065	0.20692	0.417463	0.200063	0.414066	0.129438	0.258511	0.394118	0.251151	0.129637	0.0142995	0.368784	0.15063	0.133305	0.719023	0.267209	0.104211	0.18101	0.723899	0.151124
CD4+ T cells_CD45RO	0.825608	CD4+ T cells	CD45RO	0.994227	2.51897	3.22696	2.80614	2.90266	2.7054	2.79398	3.64738	2.68954	2.90877	2.97595	3.24369	3.03325	2.86535	2.49686	2.70136	3.50013	2.6354	2.69956	3.16694	3.21367	2.55548	3.62324
CD4+ T cells_CD49d	0.994227	CD4+ T cells	CD49d	0.994227	1.56956	1.7649	1.81946	2.00184	1.43808	1.58964	2.50844	2.17541	0.959063	1.57712	1.33341	1.56284	0.924676	1.93091	1.34752	1.88682	2.3027	1.95401	1.21484	1.82419	2.35156	1.79089
CD4+ T cells_CD54	0.861078	CD4+ T cells	CD54	0.994227	0	0.0306952	0	0.095455	0.0121997	0.0371914	0.124875	0	0.041588	0	0.102023	0	0	0.110376	0.0763259	0.313823	0.084898	0.0109998	0.113456	0.0932647	0.346806	0.313347
CD4+ T cells_CD69	0.0182392	CD4+ T cells	CD69	0.21887	3.09403	3.45205	2.82836	2.73238	3.49545	3.15791	3.1103	3.54874	3.12525	3.86285	2.64486	2.94208	1.82119	3.1584	2.39147	3.26244	3.22894	3.09657	3.34767	3.7488	2.35436	3.66656
CD4+ T cells_FoxP3	0.646061	CD4+ T cells	FoxP3	0.994227	1.14285	1.58127	0.695385	0.899639	1.05344	0.554366	1.11178	0.991547	0.743563	1.34401	0.969317	0.318013	0.0406888	0.436414	0.389664	0.529245	0.804102	0.331685	0.643632	0.554711	0.942657	0.518986
CD4+ T cells_Gata3	0.395706	CD4+ T cells	Gata3	0.994227	0.615244	1.02535	0.40771	0.852805	0.558508	0.710813	1.02618	0.624091	0.572423	0.70272	1.0207	0.43933	0.165543	0.744338	0.468295	1.29757	0.825718	0.522675	0.633888	0.641654	1.27736	0.808272
CD4+ T cells_PD1	0.596635	CD4+ T cells	PD1	0.994227	0.789265	2.0387	1.01322	1.76826	1.64597	1.37978	1.86254	0.877335	2.80571	2.15069	1.35703	1.53979	1.42624	0.963201	1.64537	2.49414	0.752688	1.37256	2.06016	1.75107	1.14093	2.10264
CD4+ T cells_Tbet	0.943932	CD4+ T cells	Tbet	0.994227	1.64894	1.83464	1.80726	2.17794	1.03705	1.37618	1.53115	1.20355	1.48361	1.65035	1.9879	1.38215	0.989981	1.86042	1.58949	2.18815	0.768645	1.15518	1.70981	1.59784	2.52982	1.47638
CD45-_CD25 (IL_2R)	0.507983	CD45-	CD25 (IL_2R)	0.953603	0.955584	1.70584	2.17183	2.06224	1.43484	1.01085	0.859106	2.1116	1.87124	1.74438	1.49302	0.586749	2.16205	0.513001	0.435316	1.36874	1.99348	0.244167	0	0.771378	1.8764	1.68054
CD45-_CD31/PECAM_1	0.953603	CD45-	CD31/PECAM_1	0.953603	0	0.0168991	0.0443854	0.173922	0	0.0092998	0.0514773	0	0	0	0	0	0.00929986	0	0	0.156658	0.0701425	0.111767	0	0.0370863	0.239115	0.0762261
CD45-_CD45RA	0.845778	CD45-	CD45RA	0.953603	1.04934	1.75624	2.06424	2.04643	1.17733	2.07492	1.97072	2.25404	2.08266	1.58674	1.28356	0.766048	2.03018	0.771542	1.32327	1.60973	2.221	2.41812	0.629909	1.12529	2.13602	1.73645
CD45-_CD45RO	0.93425	CD45-	CD45RO	0.953603	0.629079	0.149641	0	0.0138996	0.23717	0.0721368	0.483608	0.0028	0.0008	0.442243	0.597335	0.218849	0	0.564876	0.188875	0.243677	0	0.318774	0.111568	0.203191	0.259276	0.253864
CD45-_CD49d	0.671765	CD45-	CD49d	0.953603	2.26495	2.80326	3.20886	3.01278	2.69082	2.63467	2.78946	3.11798	2.88343	2.97835	2.74352	1.84017	3.24446	1.43529	1.91335	2.58165	3.08782	2.11954	0.582326	2.34043	2.98752	2.77808
CD45-_CD54	0.124613	CD45-	CD54	0.587449	0.136575	0.00909987	0	0	0.0902773	0.21288	0.810277	0	0	0.133999	0.373363	0	0	0.0635572	0.244651	0.11276	0	0.203003	0.233668	0.060063	0.107294	0.0982406
CD45-_FoxP3	0.891177	CD45-	FoxP3	0.953603	2.45608	1.76583	0.566938	1.32882	1.65942	0.443864	1.54878	0.516876	1.07613	1.98099	2.71339	0.988151	0.357063	1.72155	0.497963	0.706532	0.528632	0.411305	1.45918	0.322512	1.46494	1.15317
CD45-_Gata3	0.195816	CD45-	Gata3	0.587449	0.0611619	0.163175	0.107195	0.0969481	0.0211984	0.181698	0.34558	0.0549723	0.0649543	0.0357924	0.0725364	0	0.0434863	0.0195987	0.118621	0.283005	0.0878868	0.505938	0.322196	0.0524757	0.109877	0.0742318
CD45-_PDL1	0.176952	CD45-	PDL1	0.587449	0.263925	0.356312	0.181403	0.296439	0.388178	0.198298	0.342183	0.273575	0.312489	0.332821	0.499294	0.0597644	0.120307	0.112761	0.144101	0.346615	0.17274	0.180616	0	0.0406875	0.350728	0.163865
CD8+ T cells_CD25 (IL_2R)	0.304356	CD8+ T cells	CD25 (IL_2R)	0.776528	0	0	0	0	0.0251973	0	0	0.018399	0	0.0319945	0.0801143	0	0	0.156658	0	0.132512	0	0	0	0	0.00439999	0.420865
CD8+ T cells_CD31/PECAM_1	0.345123	CD8+ T cells	CD31/PECAM_1	0.776528	0.0006	0.361007	0.277813	0.30982	0.128447	0.230552	0.72217	0.103217	0.0139995	0.128645	0.253768	0.0129996	0	0.312585	0.155374	0.331495	0.137566	0.167811	0.248824	0.052376	0.425357	0.322386
CD8+ T cells_CD45RA	0.862133	CD8+ T cells	CD45RA	0.979967	0.456752	0.271743	0.0671495	0.311536	0.231526	0.274538	0.469554	0.133701	0.223143	0.304092	0.294619	0.130826	0.00719994	0.34275	0.185337	0.182879	0.233084	0.310201	0.272514	0.172937	1.29079	0.222558
CD8+ T cells_CD45RO	0.979967	CD8+ T cells	CD45RO	0.979967	1.4305	3.25027	2.3767	1.9312	2.07042	2.19695	3.31985	1.68679	1.94269	2.38279	3.1615	1.95589	2.21687	2.07029	2.04727	3.19641	2.21203	1.844	2.34919	2.48707	1.62084	3.39229
CD8+ T cells_CD49d	0.577176	CD8+ T cells	CD49d	0.979967	1.95328	1.99404	1.71509	1.84338	1.67618	1.60998	2.7944	2.13556	0.989916	1.67697	1.69776	1.90276	1.19908	1.93006	1.43924	2.15331	2.03444	2.12044	1.49472	1.56452	2.17874	2.35549
CD8+ T cells_CD54	0.945407	CD8+ T cells	CD54	0.979967	0.00359999	0.0544731	0.0291959	0.259478	0.0315947	0.133999	0.331874	0.00679995	0.043786	0.0231979	0.282526	0.0163993	0.0757276	0.181797	0.080513	0.613738	0.0101998	0.0721374	0.145783	0.154188	0.596408	0.902986
CD8+ T cells_CD69	0.0554368	CD8+ T cells	CD69	0.496555	3.52438	3.44786	3.8547	2.75835	3.85805	3.04001	3.79574	3.90312	3.50356	3.95217	3.46062	3.07695	2.8048	3.53248	2.62335	3.65372	3.56372	3.5604	3.2956	3.85069	2.82742	3.93674
CD8+ T cells_PD1	0.110346	CD8+ T cells	PD1	0.496555	2.51752	2.35877	1.86654	1.4698	2.50961	1.21359	2.74054	1.97551	2.70712	2.24239	2.42805	1.5634	1.56067	1.58485	1.84431	2.35026	1.95039	1.86029	1.34777	0.578234	1.31167	1.67422
CD8+ T cells_Tbet	0.910467	CD8+ T cells	Tbet	0.979967	1.76007	1.90837	2.10244	2.41127	1.55986	1.58533	1.94368	1.68018	1.88797	1.78536	2.10766	1.40967	1.89002	2.29575	1.86961	2.47216	1.79588	1.7723	1.95545	1.85877	2.75116	2.06024
Granulocytes_CD31/PECAM_1	0.441276	Granulocytes	CD31/PECAM_1	0.791967	1.04484	0.980807	0.605346	1.05743	0.790394	0.575331	0.979755	0.470453	0.503903	0.704784	1.30026	0.394674	0.592686	1.20361	0.836263	1.17226	0.913598	0.589804	0.880737	0.692747	1.02267	1.12024
Granulocytes_CD49d	0.891851	Granulocytes	CD49d	0.891851	0.978306	1.01808	0.685128	1.33425	0.929059	0.745501	1.51948	0.822776	1.19265	1.27762	1.30647	0.581134	1.61427	1.11196	1.11333	1.655	1.40986	1.67038	0.946575	1.34376	1.74346	1.46235
Granulocytes_CD54	0.112935	Granulocytes	CD54	0.45174	0.465595	0.346523	0.154781	0.781716	0.32039	0.944211	0.803953	0.513354	0.237851	0.30562	0.58198	1.2852	0.570025	0.869801	0.644126	0.809016	0.464334	0.396156	0.998508	0.553675	0.792876	0.69818
Granulocytes_CD86	0.593975	Granulocytes	CD86	0.791967	0.226654	0.115145	0.146871	0.52837	0.0801143	0.135981	0.54675	0.141725	0.0913728	0.180518	0.286358	0.108586	0.0856951	0.384924	0.36035	0.419029	0.264119	0.0787187	0.283872	0.244167	0.292318	0.44106
Microglia_CD25 (IL_2R)	0.687249	Microglia	CD25 (IL_2R)	0.774867	1.71135	1.00162	0.0667504	0.50222	0.345675	0.565907	1.05308	0.292415	2.09053	0.862009	2.61217	1.85707	0.233473	2.16025	1.26593	1.74295	0.386319	0.354903	0	0.54727	2.05778	2.75978
Microglia_CD31/PECAM_1	0.489516	Microglia	CD31/PECAM_1	0.774867	1.11321	0.761684	0.416089	0.876273	0.685128	0.780354	1.03251	0.322672	0.47978	0.626254	1.22413	0.506115	0.32941	0.646265	0.674807	1.07234	0.694746	0.515291	0.773674	0.745888	1.1304	1.0662
Microglia_CD49d	0.555311	Microglia	CD49d	0.774867	3.15037	2.01293	0.527757	1.48093	1.13914	1.85405	2.07347	1.43776	3.27348	1.78281	3.6298	3.42151	1.04647	3.32565	2.58032	2.85173	1.26153	1.43041	0.187696	1.57814	3.02446	3.93137
Microglia_CD54	0.324886	Microglia	CD54	0.774867	0.514411	0.186517	0.0952559	0.395786	0.268174	0.52548	0.510973	0.166825	0.474404	0.216114	0.955852	0.852949	0.223144	0.333958	0.577722	1.06521	0.260639	0.194766	1.11711	0.448783	1.15621	0.915877
Microglia_CD69	0.774867	Microglia	CD69	0.774867	2.03941	1.8707	1.37846	1.87412	1.10285	1.77937	2.03428	1.06872	1.7664	1.43005	2.51861	0.688019	0.189071	1.14453	0.902429	1.57505	1.17789	1.40912	1.78232	1.49699	2.17327	2.31114
Microglia_CD86	0.178301	Microglia	CD86	0.774867	0.285698	0.390592	0.110177	0.428743	0.261799	0.38418	0.309056	0.27685	0.259865	0.26856	0.81776	0.255801	0.177467	0.308102	0.326185	0.511943	0.387063	0.162287	0.459463	0.275309	0.601978	0.416641
Microglia_PDL1	0.536476	Microglia	PDL1	0.774867	0.239115	0.38297	0.0908749	0.437144	0.104808	0.0953554	0.297397	0.0545729	0.230942	0.181797	0.457114	0.117728	0.0477818	0.219825	0.154386	0.367099	0.133999	0.0679477	0.421416	0.0365918	0.729698	0.380362
Monocytes_CD25 (IL_2R)	0.62415	Monocytes	CD25 (IL_2R)	0.728175	0.549696	0.44606	0.00739993	0.231136	0.756385	0.426364	0.782927	0.0741037	0.573534	0.549522	2.03757	0.74898	0.43386	0.747746	0.136575	0.61009	0.134791	0.325236	0.0271966	0.307401	0.864158	1.47063
Monocytes_CD31/PECAM_1	0.460654	Monocytes	CD31/PECAM_1	0.644915	2.58306	2.60267	2.29838	2.44426	2.10834	2.11165	3.06154	2.2012	2.01555	2.50303	2.34193	1.12963	1.9304	2.30689	2.26126	2.59949	2.99213	2.64262	2.40516	2.5871	2.45676	2.64645
Monocytes_CD36	0.357558	Monocytes	CD36	0.625727	3.64126	4.05844	3.94545	4.12376	3.23571	3.74112	4.44326	3.61798	2.91094	3.32092	4.12	3.05408	3.96899	4.07738	4.10113	4.17295	4.17866	3.20665	3.63474	3.77635	3.98378	4.13961
Monocytes_CD45RA	0.83094	Monocytes	CD45RA	0.83094	0.835971	1.25036	0.685128	0.844267	1.31373	0.922209	1.56484	0.592177	1.02897	1.15953	2.19673	0.761254	1.32808	1.05221	0.52802	1.18665	0.948327	0.661981	0.576698	1.02947	1.28283	1.77348
Monocytes_CD49d	0.29228	Monocytes	CD49d	0.625727	2.49178	2.78544	1.93607	2.33793	2.45083	2.06952	3.02223	2.2313	2.61118	2.44921	4.14316	2.49704	2.84436	2.8808	1.74088	3.26977	2.5028	2.13947	2.2286	1.86964	3.01966	3.46394
Monocytes_CD54	0.0968284	Monocytes	CD54	0.60342	1.40792	1.1718	1.53593	1.39604	1.71741	2.19378	1.97458	1.4722	1.10326	0.953169	2.11413	3.19111	1.38611	1.57497	1.38887	2.09501	1.15953	1.37466	2.95338	1.20112	2.11026	2.12287
Monocytes_CD86	0.172406	Monocytes	CD86	0.60342	1.23544	1.42969	1.25469	1.38082	0.275598	0.980281	1.69545	1.06985	0.296917	0.723427	2.50423	0.866467	0.947923	0.897124	0.686735	1.57481	0.900198	0.540844	0.517404	0.561261	1.7622	1.12752
Myeloid_CD25 (IL_2R)	0.657803	Myeloid	CD25 (IL_2R)	0.831275	3.94574	3.93931	3.46488	4.2898	3.91774	3.69131	3.95217	3.73304	4.7178	4.12672	4.19605	4.50975	1.80431	4.58769	3.87706	3.86362	4.08056	3.49341	0.180124	3.81935	4.15181	4.95009
Myeloid_CD31/PECAM_1	0.677806	Myeloid	CD31/PECAM_1	0.831275	2.04105	1.88646	2.41138	1.91871	1.75933	1.78137	2.39671	1.26535	1.32788	1.64916	2.27578	1.40334	1.49195	1.82908	1.32897	2.58564	2.34545	1.82481	1.85902	1.84351	2.31334	1.77144
Myeloid_CD36	0.227282	Myeloid	CD36	0.831275	0.130826	0.110575	0.0643556	0.23717	0.208486	0.0938621	0.224314	0.0758273	0.100431	0.0928665	0.304187	0.130727	0	0.180813	0.0968485	0.246108	0.149443	0.0163993	0.109779	0.045784	0.287234	0.281853
Myeloid_CD49d	0.727366	Myeloid	CD49d	0.831275	5.14168	5.02498	5.07909	5.28825	4.99453	4.99973	5.13501	5.20922	5.66484	5.13886	5.19781	5.6514	3.70148	5.56636	5.03552	5.04328	5.49018	4.93914	1.32927	5.01702	5.11353	5.90118
Myeloid_CD54	0.365696	Myeloid	CD54	0.831275	1.24021	0.710021	1.72086	1.37018	1.18798	1.51918	1.71815	1.36266	1.35654	0.935943	1.89323	1.72894	1.62933	1.0793	1.32778	2.41766	1.48546	1.10702	2.42393	1.65456	2.55166	1.63171
Myeloid_CD69	0.499304	Myeloid	CD69	0.831275	2.88161	2.76179	2.91844	2.68679	1.96269	2.78657	3.10095	2.87539	2.63833	2.46496	2.75405	1.87876	0.123486	1.96098	0.470992	2.65844	2.68447	2.40179	2.80524	2.34285	2.56981	2.69948
Myeloid_CD86	0.182667	Myeloid	CD86	0.831275	0.492275	0.823217	0.501688	0.855039	0.590822	0.640582	0.846587	0.617168	0.628581	0.617168	1.19188	0.492097	0.41756	0.695545	0.576698	1.08998	0.738825	0.388178	0.880383	0.539626	1.26394	0.715239
Myeloid_PDL1	0.853833	Myeloid	PDL1	0.853833	0.289058	0.368409	0.11137	0.507971	0.196336	0.161398	0.307911	0.144497	0.325236	0.304283	0.523289	0.199278	0.0555714	0.314966	0.141923	0.373085	0.165247	0.0854958	0.449781	0.102222	0.816429	0.47978
NK cells_CD25 (IL_2R)	0.510387	NK cells	CD25 (IL_2R)	0.574186	0.874711	0	0	0	0.292798	0.206235	0	0.198297	0	0.0471825	0.203982	0	0.0003	0	0	0.0718381	0	0	0	0	0	0.0554713
NK cells_CD31/PECAM_1	0.00563113	NK cells	CD31/PECAM_1	0.0168934	0.271356	0.151421	0.0316938	0.101426	1.63212	0.911568	0.327608	0.203101	0	0	1.58107	0.186614	0.972386	0.131818	0.0775223	1.48041	0.0663513	0.476485	0.00959985	0.0151994	0.172543	0.0894793
NK cells_CD45RA	0.0120301	NK cells	CD45RA	0.0270677	1.23235	2.57157	2.86259	3.30179	0.941032	1.1814	3.91613	1.12142	3.11837	3.20504	1.2992	1.75699	0.150234	3.25184	2.27913	1.61123	3.56088	2.45999	3.56131	3.92498	3.18636	2.90529
NK cells_CD45RO	0.133775	NK cells	CD45RO	0.171997	0.943151	0.152409	0	0.0817091	0.305238	0.218937	0.315252	0.0809116	0.0843001	0.0970445	0.521446	0.057668	0.0714392	0.125867	0.0799148	0.503637	0.129835	0.157819	0.207801	0	0.339066	0.243099
NK cells_CD49d	0.000991141	NK cells	CD49d	0.00892027	2.3585	2.32095	1.39047	1.8932	4.12265	4.03474	2.24289	3.3578	1.62342	1.83909	4.69766	2.60972	4.84136	1.90872	1.79709	4.32251	1.8277	2.37083	2.14679	1.30457	2.19928	1.95611
NK cells_CD54	0.00220095	NK cells	CD54	0.00990429	0.44969	0.332064	0.0725355	0.252121	2.21104	2.03526	0.457656	0.63372	0.237365	0.187104	2.27052	1.39064	1.61453	0.384831	0.499826	1.80228	0.218849	0.952834	0.47225	0.220411	0.323716	0.472878
NK cells_CD69	0.606849	NK cells	CD69	0.606849	0.224696	1.17834	0.223237	0.310392	0.24203	1.55124	0.650207	0.25554	2.82431	0.631095	0.811689	1.99641	1.24629	1.05221	0.814274	0.737968	1.58909	0.458739	3.19578	0.240087	0.601641	1.01559
NK cells_PDL1	0.0930795	NK cells	PDL1	0.139619	0.376813	0.104808	0.0005	0.0924682	0.175892	0.147168	0.14123	0.109381	0.0215983	0.108388	0.262186	0.193687	0.130727	0.0478817	0	0.322386	0	0.0589657	0.137665	0.0016	0.157745	0.107486
NK cells_Tbet	0.0203715	NK cells	Tbet	0.0366687	0	3.29561	3.73019	3.71685	0.268753	0.718299	4.10162	0.366104	3.12314	3.5259	1.23727	1.48515	0.187498	3.84635	2.50257	1.50649	3.13505	1.07351	3.51726	3.40653	3.99533	3.67435
Undefined_CD25 (IL_2R)	0.974861	Undefined	CD25 (IL_2R)	0.995366	3.58392	3.41	2.7165	3.25913	3.38413	3.54916	3.42338	3.4187	3.74537	3.62214	3.67373	3.58492	3.13935	3.79602	3.64049	3.40636	3.50111	3.56255	0.0687458	3.44151	3.49091	3.79913
Undefined_CD31/PECAM_1	0.613198	Undefined	CD31/PECAM_1	0.995366	0.660758	0.30982	0.342466	0.435502	0.313919	0.184157	0.550561	0.0360922	0.116139	0.220997	0.415722	0.0799149	0.171754	0.195551	0.126463	0.675292	0.482642	0.156757	0.397082	0.393932	0.642149	0.188286
Undefined_CD45RA	0.973579	Undefined	CD45RA	0.995366	2.54508	2.46732	1.75128	2.41596	2.25467	2.33421	2.44674	2.42194	2.82924	2.69648	2.84868	2.44632	2.24414	2.95311	2.59111	2.52532	2.49941	2.547	0.160112	2.25992	2.60752	2.99201
Undefined_CD45RO	0.508866	Undefined	CD45RO	0.995366	0.153299	0.15231	0.203982	0.140933	0.245623	0.127653	0.234641	0.0328941	0.0505784	0.0455842	0.103018	0.0311949	0.0933639	0.130232	0.0317946	0.366724	0.230747	0.0371913	0.665817	0.111568	0.375886	0.109879
Undefined_CD49d	0.995366	Undefined	CD49d	0.995366	4.09596	3.86028	3.41757	3.77206	3.83904	3.85341	3.80575	3.83659	4.24156	3.99791	4.1552	4.07626	3.9315	4.28279	4.10614	3.88597	4.11041	4.01855	0.406075	3.88451	3.86879	4.32387
Undefined_CD54	0.648157	Undefined	CD54	0.995366	0	0	0	0.002	0	0	0.0295957	0	0	0	0.0336936	0	0	0	0	0.239698	0	0	0.508502	0.0371914	0.321056	0
Undefined_CD69	0.730009	Undefined	CD69	0.995366	0.391984	0.198102	0.443334	0.297205	0.0341933	0.154584	0.327893	0.113357	0.186124	0.15814	0.419397	0	0	0.0026	0	0.0469827	0.157745	0.251539	1.01358	0.237365	0.219044	0.0767247
Undefined_FoxP3	0.962713	Undefined	FoxP3	0.995366	0.284641	0.492186	0.152014	0.0886837	0.0987395	0	0.00799991	0.0328941	0.161694	0.117926	0.285121	0	0	0	0	0.0639564	0	0.0264969	0.639269	0.0419877	0.212204	0
Undefined_Gata3	0.762627	Undefined	Gata3	0.995366	0.0547726	0.189857	0.188089	0.315347	0.282911	0.145288	0.18042	0.17067	0.159523	0.154188	0	0.142715	0.169485	0.0427869	0.108189	0.324096	0.154781	0.0538739	1.09298	0.130033	0.248049	0.0345931
Septum zoom NKB; MSvsCon	p_val	cluster_id	marker_id	p_adj	control01	control02	ad02	control07	ms02	ms03	ms09	ms04	control03	ad03	ms05	ms07	ms12	control06	ms08	ms10	control08	control11	control09	ad04	control10	ad07
ASCs_CD25 (IL_2R)	0.781445	ASCs	CD25 (IL_2R)	0.895811	2.9932	0.336229		0.691011	0.415034	0.78217	0.390827	0.0452383	2.04612		0.601978	3.84624	2.75591	0.42437	0	0.0547726		0			0.808123	0.0734357
ASCs_CD31/PECAM_1	0.0832982	ASCs	CD31/PECAM_1	0.714813	3.31213	1.59636		1.8625	2.20943	2.43741	3.40797	1.02988	1.22055		2.32708	2.31177	1.59907	0.554527	0.735945	2.74656		0.893484			1.8304	1.08967
ASCs_CD45RA	0.355651	ASCs	CD45RA	0.82044	2.97452	1.81293		2.64062	2.27802	1.47755	2.49864	1.9152	2.46412		1.08659	3.14872	2.29995	4.14482	2.47791	1.20074		1.30568			1.1164	3.77626
ASCs_CD45RO	0.119136	ASCs	CD45RO	0.714813	0.0121997	0.239115		0.243554	0.361663	0.537885	0.523002	0.183204	0.333118		0.667675	0.0680189	0.0150977	0.0168968	0.468295	1.09384		0.0281963			0.604	0.517519
ASCs_CD49d	0.338294	ASCs	CD49d	0.82044	5.27646	4.94538		4.90122	4.24173	4.83339	5.39566	4.93633	5.06213		5.09606	5.1063	5.16084	4.70365	4.72446	5.83848		4.94739			5.20218	4.70401
ASCs_CD54	0.285328	ASCs	CD54	0.82044	4.8943	3.2384		3.07106	3.03539	3.50112	4.25225	2.06085	2.95601		3.81039	3.17448	3.11675	2.47927	2.18298	4.06699		3.52446			3.00872	2.60626
ASCs_CD69	0.431509	ASCs	CD69	0.82044	0.64083	0.055172		0.265715	0	1.46884	0.193872	0	0.396663		1.47937	0.248215	0.792085	0.963703	0	1.08841		0.210052			0.117331	0.0818342
ASCs_CD86	0.678729	ASCs	CD86	0.895811	0	0.15063		0.223756	0.156065	0	0.582304	0.061346	0.453162		0.313823	0	0	0.968005	0.933561	0.955047		0.228993			0.692347	1.08012
ASCs_FoxP3	0.54696	ASCs	FoxP3	0.82044	2.67737	2.79125		2.15396	2.26838	1.71975	2.47702	2.7702	2.18084		2.67523	1.39103	0.565048	2.07413	1.83626	2.56288		1.12278			2.12469	2.83447
ASCs_PD1	0.491435	ASCs	PD1	0.82044	1.05196	0		0.00519991	0	0	0	0.0281851	0.319425		0	0	0	0	0	0.0926673		0			0	0
ASCs_PDL1	0.895811	ASCs	PDL1	0.895811	0.432399	0.405219		0.129159	0.204859	0.315538	0.423298	0.232888	0.315121		0.412962	0.339363	0.226763	0.146477	0	0.45114		0			0.474942	0.0788725
ASCs_Tbet	0.865096	ASCs	Tbet	0.895811	0	0.764671		0.66318	0.156754	0.417192	0.844745	0.0652149	0.639466		1.09997	0.345571	0.0725364	0.244546	0.361101	1.20383		0.205354			0.97329	0.54093
B cells_CD25 (IL_2R)	0.16961	B cells	CD25 (IL_2R)	0.64793	0.0416877	0.238821	0.191512	1.07479	1.07454	0.444597	0.292607	2.59307	0.206969	3.82582	0.609537	3.20507	1.04183	0.207312	0.149045	0.595713	0.422333	0.142613	0	3.27101	0.393561	3.27911
B cells_CD31/PECAM_1	0.617371	B cells	CD31/PECAM_1	0.870045	0.42828	0.120308	0.102615	0.516524	0.0852965	0.145976	0.33604	0	0.146963	0.207116	0.272225	0.0227979	0.103993	0.291648	0.103714	0.620186	0.241253	0.122185	0.129438	0.0404847	0.298737	0.195724
B cells_CD45RA	0.670136	B cells	CD45RA	0.870045	3.94062	3.7116	4.41447	3.65423	3.83568	3.80357	4.34656	3.51513	3.51531	3.62148	4.06315	3.63911	4.05489	4.58022	4.05039	4.86554	4.15075	4.41069	4.1727	3.39618	4.05998	3.64396
B cells_CD45RO	0.79095	B cells	CD45RO	0.870045	0.0626582	0.103316	0.00309998	0.211617	0.0237978	0	0.146278	0	0.0263878	0.283776	0.322006	0.0234978	0.250157	0.128843	0.0469814	0.296892	0.00619996	0.0126997	0.192018	0.0148978	0.365226	0.269082
B cells_CD49d	0.307759	B cells	CD49d	0.829524	1.94791	2.47475	2.5127	3.02359	2.85215	2.48703	2.52982	3.73918	1.87989	4.63749	3.27109	4.25986	2.7421	2.47734	1.91721	2.62702	2.58309	2.37445	2.2057	4.43806	2.88824	4.3201
B cells_CD54	0.377056	B cells	CD54	0.829524	0.429013	0.172345	0.562153	0.727663	0.131223	0.34473	0.836555	0	0.25396	0.040389	0.757649	0.132375	0.032393	0.634219	0.383156	0.687293	0.385947	0.164245	0.903543	0.465355	1.13565	0.18966
B cells_CD69	0.679643	B cells	CD69	0.870045	0.376602	0.23891	0.322684	0	0.187892	0.635974	0.315538	0	0.0167968	0	0.543086	0	0.200526	0.337742	0	0.985783	0	2.11082	0.178451	0	0.377379	0.0176991
B cells_CD86	0.995233	B cells	CD86	0.995233	0	0	0	0	0	0	0	0	0	0.0543732	0.0346929	0	0	0	0	0.00429997	0.00739993	0	0	0.00219999	0.0299955	0.0444848
B cells_FoxP3	0.0242567	B cells	FoxP3	0.266824	1.84198	2.40413	1.16632	1.44533	1.58894	1.39097	1.87484	1.53424	2.03659	0.819237	1.48658	0.786637	0.0728317	1.40394	1.10407	0.981394	1.22856	0.770839	1.9259	1.32025	1.81306	0.69638
B cells_PDL1	0.782295	B cells	PDL1	0.870045	0.104602	0.0423873	0.0546725	0.236392	0.0603633	0.018199	0.00979984	0	0.0102993	0.0151994	0.190545	0.140722	0	0	0.036292	0	0.0601637	0	0.0735337	0.168571	0.0892813	0.116534
B cells_Tbet	0.176708	B cells	Tbet	0.64793	0.158825	0.748441	0.422791	0.280122	0	0.104708	0.936011	0	0	0	0.226704	0.0242953	0.117885	0.875563	0.284542	0.787331	0.18101	0	2.0268	0.0763996	0.559714	0.043182
NK CD56bright_CD25 (IL_2R)	0.129209	NK CD56bright	CD25 (IL_2R)	0.177663	0.796177	0	0	0	0.285505	0.212298	0.134494	0.343771	0	0.896145	0.325899	0.100331	0	0.0136994	0	0.136179	0	0.0238909	0	0	0	0.642478
NK CD56bright_CD31/PECAM_1	0.000394796	NK CD56bright	CD31/PECAM_1	0.00108569	0.274538	0.355091	0.0783184	0.074531	1.53585	1.51113	1.41578	0.350102	0	0.162089	1.92938	1.00343	1.017	0.36157	0.12557	2.20844	0.296439	1.03578	0.260059	0.383177	0.209856	0.0831043
NK CD56bright_CD45RA	0.000385275	NK CD56bright	CD45RA	0.00108569	1.09589	0.975669	0.543172	2.25433	0.758845	0.846587	0.950436	0.503261	2.05576	1.06755	0.683519	0.762143	0.101426	2.15315	1.70935	0.891519	2.18596	1.36156	3.57461	0	3.18193	1.28869
NK CD56bright_CD45RO	0.754052	NK CD56bright	CD45RO	0.754052	0.992721	0.389478	0.00299998	0.236587	0.305238	0.321341	0.6761	0.198191	0.221777	0.750836	0.702321	0.134692	0.0705415	0.673704	0.1338	0.675131	0.380735	0.350683	0.31268	0.389058	0.425998	0.569854
NK CD56bright_CD49d	3.07968e-05	NK CD56bright	CD49d	0.000169382	2.29224	2.84408	1.963	1.80457	4.10077	4.52714	4.34674	4.33589	1.4105	2.57148	5.01801	4.27447	4.85501	2.20212	2.0334	5.05796	2.2922	3.23296	1.72266	1.87469	2.20343	2.50264
NK CD56bright_CD54	1.77575e-05	NK CD56bright	CD54	0.000169382	0.450596	0.828802	0.389756	0.452227	2.10456	2.29881	2.11938	1.26431	0.403372	0.421782	2.54252	2.53952	1.68575	0.986905	0.893273	2.44897	0.924816	1.20422	0.737502	0.742782	0.840925	1.37694
NK CD56bright_CD69	0.249261	NK CD56bright	CD69	0.304652	0.0930656	3.14478	3.63416	0.975405	0.435502	2.04767	0.79979	0.396958	3.49578	0.155769	1.46444	1.48889	1.46797	1.1964	1.92127	1.25627	3.55444	0.886143	3.56235	1.8831	0.984747	3.58165
NK CD56bright_CD86	0.0418696	NK CD56bright	CD86	0.065795	0.179829	0	0	0	0.113158	0.00729993	0.0756263	0.0596644	0	0.0259971	0.116834	0.051677	0.0221982	0	0	0.387434	0	0.0876874	0	0.0699714	0	0
NK CD56bright_FoxP3	0.479467	NK CD56bright	FoxP3	0.527414	2.44845	2.06484	0.978365	0.860862	1.78019	1.09326	1.64752	2.26545	0.764977	1.762	2.17794	1.0754	0.27839	0.462165	0.192116	1.79252	0.619757	0.825641	0.999351	0.773333	1.14274	0.728759
NK CD56bright_PDL1	0.00927456	NK CD56bright	PDL1	0.0170034	0.382597	0.121898	0.0753031	0.126264	0.175892	0.160411	0.350669	0.224314	0.0453844	0.152805	0.318298	0.260542	0.133206	0.030995	0	0.447694	0	0.0708374	0.0245975	0	0.111171	0.191036
NK CD56bright_Tbet	0.000710182	NK CD56bright	Tbet	0.0015624	0	2.16533	2.6832	2.82946	0.314395	0.559454	0.882119	0.144001	2.21238	0.0633576	0.966129	0.382026	0.177861	1.76477	1.98756	1.1853	2.13872	0.371133	2.53497	1.03215	3.51782	2.24231
NK CD56dim_CD31/PECAM_1	0.323499	NK CD56dim	CD31/PECAM_1	0.555605	0.0613615	0.0661517	0.0144988	0.106001		0.003	0.209661	0	0	0	0.106598	0	0.038876	0.0981424	0.0187989	0.613403	0.0163993	0.0173965	0.0014	0.0151994	0.122692	0.0884828
NK CD56dim_CD45RA	0.555605	NK CD56dim	CD45RA	0.555605	3.98697	3.11038	3.12036	3.45891		4.11504	4.15642	3.66259	3.70097	3.40034	3.5244	3.0257	3.11317	3.32316	3.03363	3.12313	3.97143	3.38022	3.56131	4.05191	3.18648	3.41019
NK CD56dim_CD45RO	0.388362	NK CD56dim	CD45RO	0.555605	0.719811	0.0213984	0	0.0563701		0	0.223729	0	0.0158991	0.00439999	0.0409885	0	0.0014	0.0751293	0	0.140141	0.0245975	0.00849959	0.192803	0	0.259381	0.125762
NK CD56dim_CD49d	0.0114292	NK CD56dim	CD49d	0.102863	2.50828	2.09442	1.30965	1.86266		1.50192	2.077	1.07667	1.61138	1.68072	1.72908	0.804102	1.21173	1.84378	1.35857	1.59183	1.58139	1.28339	2.25789	1.11841	2.0829	1.69552
NK CD56dim_CD54	0.513407	NK CD56dim	CD54	0.555605	0.215528	0.136575	0.0361915	0.224314		0.136377	0.293374	0.0729343	0.116735	0.128248	0.265857	0.411489	0.228116	0.333295	0.125272	0.331399	0.0659522	0.222708	0.435318	0.179042	0.160411	0.259762
NK CD56dim_CD69	0.221801	NK CD56dim	CD69	0.555605	3.21896	1.00601	0.186902	0.313442		0.609882	0.647416	0.183128	2.69119	1.27984	0.339066	2.5689	0.501812	1.08816	0.313061	0.615227	0.847022	0.190882	2.98662	0.240087	0.678677	1.01418
NK CD56dim_FoxP3	0.51197	NK CD56dim	FoxP3	0.555605	1.49434	1.59131	0.0835028	0.330927		0.561264	0.699535	1.21211	0.513706	0.834949	1.04334	0.278583	0.185122	0.174119	0.0533747	0.479759	0.413882	0.663371	0.499383	0.136179	0.652994	0.359317
NK CD56dim_PDL1	0.296768	NK CD56dim	PDL1	0.555605	0.248049	0.0681472	0	0.0924682		0.0687458	0.0924682	0	0.0160993	0.102023	0.0892813	0.101028	0	0.0478817	0	0.0959519	0	0.0417717	0.159816	0.00799991	0.163175	0.0641558
NK CD56dim_Tbet	0.356982	NK CD56dim	Tbet	0.555605	3.35161	3.77973	3.79571	3.80308		3.38782	4.23609	2.89291	3.64707	3.69871	4.26637	3.93767	4.0932	3.94638	3.75304	4.35122	3.64618	3.93513	3.61215	3.47335	4.14545	4.17304
Undefined_CD25 (IL_2R)	0.448838	Undefined	CD25 (IL_2R)	0.894134	3.50228	2.10512	3.3578	2.5392	1.49734	1.19177	2.63777	4.25255	1.10781	4.20706	3.30857	2.51405	0.499282	3.09106	4.12711	1.6627	2.65674	0.0283962	3.34699	4.75213	0.922634	3.39968
Undefined_CD31/PECAM_1	0.554418	Undefined	CD31/PECAM_1	0.894134	0.141527	0.0315928	0.254639	0.240961	0.209256	0.242575	0.593943	0	0	0	0.563555	0.0397886	0.0203943	0.158809	0.0657525	0.223136	0.0359922	0	0.114252	0.233473	0.617378	0.17037
Undefined_CD45RA	0.862129	Undefined	CD45RA	0.940506	3.20105	2.47355	3.31132	2.2952	2.53135	1.09277	3.32895	4.15894	2.52122	3.98796	2.98385	2.14669	2.01147	2.60809	4.01508	1.71656	3.13328	3.80714	2.81313	4.34475	3.65591	3.40031
Undefined_CD45RO	0.568994	Undefined	CD45RO	0.894134	0.809907	0.360255	0	0.198984	0.115732	0.41912	0.560932	0	0.0764252	0.327703	0.659459	0.396522	0.11564	0.184543	0.213279	0.15852	0.00779992	0.296056	0	0.565048	0.556583	0.233365
Undefined_CD49d	0.0217386	Undefined	CD49d	0.157089	4.44214	3.79322	4.17996	3.86347	4.0232	4.09584	4.34901	5.0489	2.34032	5.14203	4.49981	4.39861	4.67174	4.15996	5.21528	3.49766	3.57332	3.4064	4.38052	5.83993	3.92129	4.56936
Undefined_CD54	0.0929663	Undefined	CD54	0.340876	0	0.332681	0	0.224797	0.85168	1.34127	0.642835	0.0053999	0.0756238	0.100232	0.917212	0.386437	0.723967	0.0605497	1.57877	0.273329	0	0.802312	0	0	1.38252	0.421208
Undefined_CD69	0.497574	Undefined	CD69	0.894134	0.712553	0.0197948	0.0928665	0	0.0312796	0.361013	0	0	0.344195	0	0.00959941	0.00379996	0.0565023	0	0	0	0	2.40656	0.13388	0.310773	0	0
Undefined_CD86	0.698563	Undefined	CD86	0.940506	0.0241976	0	0	0	0.0016	0	0.0513738	0	0	0.0463834	0.0251971	0.0979202	0	0.0269869	0.00899984	0.00909988	0	0.0417878	0.111299	0.0465831	0.0921693	0.079306
Undefined_FoxP3	0.0285617	Undefined	FoxP3	0.157089	1.13064	1.9628	0.322006	1.12424	1.2188	1.19799	1.32986	0.598967	0.504092	1.65205	0.999944	1.00466	0.237503	1.06608	0.524078	0.645936	1.07013	0.302563	1.18615	1.06299	1.94442	0.601961
Undefined_PDL1	0.899118	Undefined	PDL1	0.940506	0.212008	0.390812	0.0531749	0.231038	0.142097	0.236181	0.244361	0.142384	0.0706375	0.154188	0.495856	0.24766	0.154514	0.202017	0.0642557	0.286069	0	0	0.249091	0.134593	0.2672	0.145082
Undefined_Tbet	0.940506	Undefined	Tbet	0.940506	0.0827057	0	0	0.0267968	0	0.102679	0.0830045	0	0.0186956	0	0.0052999	0	0.0182987	0	0	0	0	0	0.30023	0	0	0
Septum zoom NKB; ADvsMS	p_val	cluster_id	marker_id	p_adj	control01	control02	ad02	control07	ms02	ms03	ms09	ms04	control03	ad03	ms05	ms07	ms12	control06	ms08	ms10	control08	control11	control09	ad04	control10	ad07
ASCs_CD25 (IL_2R)	0.634751	ASCs	CD25 (IL_2R)	0.846335	2.9932	0.336229		0.691011	0.415034	0.78217	0.390827	0.0452383	2.04612		0.601978	3.84624	2.75591	0.42437	0	0.0547726		0			0.808123	0.0734357
ASCs_CD31/PECAM_1	0.408445	ASCs	CD31/PECAM_1	0.799327	3.31213	1.59636		1.8625	2.20943	2.43741	3.40797	1.02988	1.22055		2.32708	2.31177	1.59907	0.554527	0.735945	2.74656		0.893484			1.8304	1.08967
ASCs_CD45RA	0.272035	ASCs	CD45RA	0.799327	2.97452	1.81293		2.64062	2.27802	1.47755	2.49864	1.9152	2.46412		1.08659	3.14872	2.29995	4.14482	2.47791	1.20074		1.30568			1.1164	3.77626
ASCs_CD45RO	0.96287	ASCs	CD45RO	0.96287	0.0121997	0.239115		0.243554	0.361663	0.537885	0.523002	0.183204	0.333118		0.667675	0.0680189	0.0150977	0.0168968	0.468295	1.09384		0.0281963			0.604	0.517519
ASCs_CD49d	0.447761	ASCs	CD49d	0.799327	5.27646	4.94538		4.90122	4.24173	4.83339	5.39566	4.93633	5.06213		5.09606	5.1063	5.16084	4.70365	4.72446	5.83848		4.94739			5.20218	4.70401
ASCs_CD54	0.477119	ASCs	CD54	0.799327	4.8943	3.2384		3.07106	3.03539	3.50112	4.25225	2.06085	2.95601		3.81039	3.17448	3.11675	2.47927	2.18298	4.06699		3.52446			3.00872	2.60626
ASCs_CD69	0.532884	ASCs	CD69	0.799327	0.64083	0.055172		0.265715	0	1.46884	0.193872	0	0.396663		1.47937	0.248215	0.792085	0.963703	0	1.08841		0.210052			0.117331	0.0818342
ASCs_CD86	0.308171	ASCs	CD86	0.799327	0	0.15063		0.223756	0.156065	0	0.582304	0.061346	0.453162		0.313823	0	0	0.968005	0.933561	0.955047		0.228993			0.692347	1.08012
ASCs_FoxP3	0.414236	ASCs	FoxP3	0.799327	2.67737	2.79125		2.15396	2.26838	1.71975	2.47702	2.7702	2.18084		2.67523	1.39103	0.565048	2.07413	1.83626	2.56288		1.12278			2.12469	2.83447
ASCs_PD1	0.957005	ASCs	PD1	0.96287	1.05196	0		0.00519991	0	0	0	0.0281851	0.319425		0	0	0	0	0	0.0926673		0			0	0
ASCs_PDL1	0.392661	ASCs	PDL1	0.799327	0.432399	0.405219		0.129159	0.204859	0.315538	0.423298	0.232888	0.315121		0.412962	0.339363	0.226763	0.146477	0	0.45114		0			0.474942	0.0788725
ASCs_Tbet	0.884531	ASCs	Tbet	0.96287	0	0.764671		0.66318	0.156754	0.417192	0.844745	0.0652149	0.639466		1.09997	0.345571	0.0725364	0.244546	0.361101	1.20383		0.205354			0.97329	0.54093
B cells_CD25 (IL_2R)	0.0296227	B cells	CD25 (IL_2R)	0.182348	0.0416877	0.238821	0.191512	1.07479	1.07454	0.444597	0.292607	2.59307	0.206969	3.82582	0.609537	3.20507	1.04183	0.207312	0.149045	0.595713	0.422333	0.142613	0	3.27101	0.393561	3.27911
B cells_CD31/PECAM_1	0.66971	B cells	CD31/PECAM_1	0.804125	0.42828	0.120308	0.102615	0.516524	0.0852965	0.145976	0.33604	0	0.146963	0.207116	0.272225	0.0227979	0.103993	0.291648	0.103714	0.620186	0.241253	0.122185	0.129438	0.0404847	0.298737	0.195724
B cells_CD45RA	0.401878	B cells	CD45RA	0.699183	3.94062	3.7116	4.41447	3.65423	3.83568	3.80357	4.34656	3.51513	3.51531	3.62148	4.06315	3.63911	4.05489	4.58022	4.05039	4.86554	4.15075	4.41069	4.1727	3.39618	4.05998	3.64396
B cells_CD45RO	0.758653	B cells	CD45RO	0.804125	0.0626582	0.103316	0.00309998	0.211617	0.0237978	0	0.146278	0	0.0263878	0.283776	0.322006	0.0234978	0.250157	0.128843	0.0469814	0.296892	0.00619996	0.0126997	0.192018	0.0148978	0.365226	0.269082
B cells_CD49d	0.0497314	B cells	CD49d	0.182348	1.94791	2.47475	2.5127	3.02359	2.85215	2.48703	2.52982	3.73918	1.87989	4.63749	3.27109	4.25986	2.7421	2.47734	1.91721	2.62702	2.58309	2.37445	2.2057	4.43806	2.88824	4.3201
B cells_CD54	0.487157	B cells	CD54	0.699183	0.429013	0.172345	0.562153	0.727663	0.131223	0.34473	0.836555	0	0.25396	0.040389	0.757649	0.132375	0.032393	0.634219	0.383156	0.687293	0.385947	0.164245	0.903543	0.465355	1.13565	0.18966
B cells_CD69	0.405363	B cells	CD69	0.699183	0.376602	0.23891	0.322684	0	0.187892	0.635974	0.315538	0	0.0167968	0	0.543086	0	0.200526	0.337742	0	0.985783	0	2.11082	0.178451	0	0.377379	0.0176991
B cells_CD86	0.0490491	B cells	CD86	0.182348	0	0	0	0	0	0	0	0	0	0.0543732	0.0346929	0	0	0	0	0.00429997	0.00739993	0	0	0.00219999	0.0299955	0.0444848
B cells_FoxP3	0.454836	B cells	FoxP3	0.699183	1.84198	2.40413	1.16632	1.44533	1.58894	1.39097	1.87484	1.53424	2.03659	0.819237	1.48658	0.786637	0.0728317	1.40394	1.10407	0.981394	1.22856	0.770839	1.9259	1.32025	1.81306	0.69638
B cells_PDL1	0.804125	B cells	PDL1	0.804125	0.104602	0.0423873	0.0546725	0.236392	0.0603633	0.018199	0.00979984	0	0.0102993	0.0151994	0.190545	0.140722	0	0	0.036292	0	0.0601637	0	0.0735337	0.168571	0.0892813	0.116534
B cells_Tbet	0.508497	B cells	Tbet	0.699183	0.158825	0.748441	0.422791	0.280122	0	0.104708	0.936011	0	0	0	0.226704	0.0242953	0.117885	0.875563	0.284542	0.787331	0.18101	0	2.0268	0.0763996	0.559714	0.043182
NK CD56bright_CD25 (IL_2R)	0.0306553	NK CD56bright	CD25 (IL_2R)	0.0843021	0.796177	0	0	0	0.285505	0.212298	0.134494	0.343771	0	0.896145	0.325899	0.100331	0	0.0136994	0	0.136179	0	0.0238909	0	0	0	0.642478
NK CD56bright_CD31/PECAM_1	0.0255747	NK CD56bright	CD31/PECAM_1	0.0843021	0.274538	0.355091	0.0783184	0.074531	1.53585	1.51113	1.41578	0.350102	0	0.162089	1.92938	1.00343	1.017	0.36157	0.12557	2.20844	0.296439	1.03578	0.260059	0.383177	0.209856	0.0831043
NK CD56bright_CD45RA	0.928395	NK CD56bright	CD45RA	0.928395	1.09589	0.975669	0.543172	2.25433	0.758845	0.846587	0.950436	0.503261	2.05576	1.06755	0.683519	0.762143	0.101426	2.15315	1.70935	0.891519	2.18596	1.36156	3.57461	0	3.18193	1.28869
NK CD56bright_CD45RO	0.819897	NK CD56bright	CD45RO	0.901887	0.992721	0.389478	0.00299998	0.236587	0.305238	0.321341	0.6761	0.198191	0.221777	0.750836	0.702321	0.134692	0.0705415	0.673704	0.1338	0.675131	0.380735	0.350683	0.31268	0.389058	0.425998	0.569854
NK CD56bright_CD49d	0.0204212	NK CD56bright	CD49d	0.0843021	2.29224	2.84408	1.963	1.80457	4.10077	4.52714	4.34674	4.33589	1.4105	2.57148	5.01801	4.27447	4.85501	2.20212	2.0334	5.05796	2.2922	3.23296	1.72266	1.87469	2.20343	2.50264
NK CD56bright_CD54	0.0120609	NK CD56bright	CD54	0.0843021	0.450596	0.828802	0.389756	0.452227	2.10456	2.29881	2.11938	1.26431	0.403372	0.421782	2.54252	2.53952	1.68575	0.986905	0.893273	2.44897	0.924816	1.20422	0.737502	0.742782	0.840925	1.37694
NK CD56bright_CD69	0.215909	NK CD56bright	CD69	0.453758	0.0930656	3.14478	3.63416	0.975405	0.435502	2.04767	0.79979	0.396958	3.49578	0.155769	1.46444	1.48889	1.46797	1.1964	1.92127	1.25627	3.55444	0.886143	3.56235	1.8831	0.984747	3.58165
NK CD56bright_CD86	0.317239	NK CD56bright	CD86	0.453758	0.179829	0	0	0	0.113158	0.00729993	0.0756263	0.0596644	0	0.0259971	0.116834	0.051677	0.0221982	0	0	0.387434	0	0.0876874	0	0.0699714	0	0
NK CD56bright_FoxP3	0.722539	NK CD56bright	FoxP3	0.883103	2.44845	2.06484	0.978365	0.860862	1.78019	1.09326	1.64752	2.26545	0.764977	1.762	2.17794	1.0754	0.27839	0.462165	0.192116	1.79252	0.619757	0.825641	0.999351	0.773333	1.14274	0.728759
NK CD56bright_PDL1	0.327081	NK CD56bright	PDL1	0.453758	0.382597	0.121898	0.0753031	0.126264	0.175892	0.160411	0.350669	0.224314	0.0453844	0.152805	0.318298	0.260542	0.133206	0.030995	0	0.447694	0	0.0708374	0.0245975	0	0.111171	0.191036
NK CD56bright_Tbet	0.330006	NK CD56bright	Tbet	0.453758	0	2.16533	2.6832	2.82946	0.314395	0.559454	0.882119	0.144001	2.21238	0.0633576	0.966129	0.382026	0.177861	1.76477	1.98756	1.1853	2.13872	0.371133	2.53497	1.03215	3.51782	2.24231
NK CD56dim_CD31/PECAM_1	0.435595	NK CD56dim	CD31/PECAM_1	0.909816	0.0613615	0.0661517	0.0144988	0.106001		0.003	0.209661	0	0	0	0.106598	0	0.038876	0.0981424	0.0187989	0.613403	0.0163993	0.0173965	0.0014	0.0151994	0.122692	0.0884828
NK CD56dim_CD45RA	0.817473	NK CD56dim	CD45RA	0.909816	3.98697	3.11038	3.12036	3.45891		4.11504	4.15642	3.66259	3.70097	3.40034	3.5244	3.0257	3.11317	3.32316	3.03363	3.12313	3.97143	3.38022	3.56131	4.05191	3.18648	3.41019
NK CD56dim_CD45RO	0.858181	NK CD56dim	CD45RO	0.909816	0.719811	0.0213984	0	0.0563701		0	0.223729	0	0.0158991	0.00439999	0.0409885	0	0.0014	0.0751293	0	0.140141	0.0245975	0.00849959	0.192803	0	0.259381	0.125762
NK CD56dim_CD49d	0.909816	NK CD56dim	CD49d	0.909816	2.50828	2.09442	1.30965	1.86266		1.50192	2.077	1.07667	1.61138	1.68072	1.72908	0.804102	1.21173	1.84378	1.35857	1.59183	1.58139	1.28339	2.25789	1.11841	2.0829	1.69552
NK CD56dim_CD54	0.347043	NK CD56dim	CD54	0.909816	0.215528	0.136575	0.0361915	0.224314		0.136377	0.293374	0.0729343	0.116735	0.128248	0.265857	0.411489	0.228116	0.333295	0.125272	0.331399	0.0659522	0.222708	0.435318	0.179042	0.160411	0.259762
NK CD56dim_CD69	0.864707	NK CD56dim	CD69	0.909816	3.21896	1.00601	0.186902	0.313442		0.609882	0.647416	0.183128	2.69119	1.27984	0.339066	2.5689	0.501812	1.08816	0.313061	0.615227	0.847022	0.190882	2.98662	0.240087	0.678677	1.01418
NK CD56dim_FoxP3	0.774585	NK CD56dim	FoxP3	0.909816	1.49434	1.59131	0.0835028	0.330927		0.561264	0.699535	1.21211	0.513706	0.834949	1.04334	0.278583	0.185122	0.174119	0.0533747	0.479759	0.413882	0.663371	0.499383	0.136179	0.652994	0.359317
NK CD56dim_PDL1	0.880077	NK CD56dim	PDL1	0.909816	0.248049	0.0681472	0	0.0924682		0.0687458	0.0924682	0	0.0160993	0.102023	0.0892813	0.101028	0	0.0478817	0	0.0959519	0	0.0417717	0.159816	0.00799991	0.163175	0.0641558
NK CD56dim_Tbet	0.698413	NK CD56dim	Tbet	0.909816	3.35161	3.77973	3.79571	3.80308		3.38782	4.23609	2.89291	3.64707	3.69871	4.26637	3.93767	4.0932	3.94638	3.75304	4.35122	3.64618	3.93513	3.61215	3.47335	4.14545	4.17304
Undefined_CD25 (IL_2R)	0.249075	Undefined	CD25 (IL_2R)	0.75361	3.50228	2.10512	3.3578	2.5392	1.49734	1.19177	2.63777	4.25255	1.10781	4.20706	3.30857	2.51405	0.499282	3.09106	4.12711	1.6627	2.65674	0.0283962	3.34699	4.75213	0.922634	3.39968
Undefined_CD31/PECAM_1	0.550478	Undefined	CD31/PECAM_1	0.75361	0.141527	0.0315928	0.254639	0.240961	0.209256	0.242575	0.593943	0	0	0	0.563555	0.0397886	0.0203943	0.158809	0.0657525	0.223136	0.0359922	0	0.114252	0.233473	0.617378	0.17037
Undefined_CD45RA	0.238895	Undefined	CD45RA	0.75361	3.20105	2.47355	3.31132	2.2952	2.53135	1.09277	3.32895	4.15894	2.52122	3.98796	2.98385	2.14669	2.01147	2.60809	4.01508	1.71656	3.13328	3.80714	2.81313	4.34475	3.65591	3.40031
Undefined_CD45RO	0.534425	Undefined	CD45RO	0.75361	0.809907	0.360255	0	0.198984	0.115732	0.41912	0.560932	0	0.0764252	0.327703	0.659459	0.396522	0.11564	0.184543	0.213279	0.15852	0.00779992	0.296056	0	0.565048	0.556583	0.233365
Undefined_CD49d	0.5246	Undefined	CD49d	0.75361	4.44214	3.79322	4.17996	3.86347	4.0232	4.09584	4.34901	5.0489	2.34032	5.14203	4.49981	4.39861	4.67174	4.15996	5.21528	3.49766	3.57332	3.4064	4.38052	5.83993	3.92129	4.56936
Undefined_CD54	0.187337	Undefined	CD54	0.75361	0	0.332681	0	0.224797	0.85168	1.34127	0.642835	0.0053999	0.0756238	0.100232	0.917212	0.386437	0.723967	0.0605497	1.57877	0.273329	0	0.802312	0	0	1.38252	0.421208
Undefined_CD69	0.965338	Undefined	CD69	0.997428	0.712553	0.0197948	0.0928665	0	0.0312796	0.361013	0	0	0.344195	0	0.00959941	0.00379996	0.0565023	0	0	0	0	2.40656	0.13388	0.310773	0	0
Undefined_CD86	0.530592	Undefined	CD86	0.75361	0.0241976	0	0	0	0.0016	0	0.0513738	0	0	0.0463834	0.0251971	0.0979202	0	0.0269869	0.00899984	0.00909988	0	0.0417878	0.111299	0.0465831	0.0921693	0.079306
Undefined_FoxP3	0.997428	Undefined	FoxP3	0.997428	1.13064	1.9628	0.322006	1.12424	1.2188	1.19799	1.32986	0.598967	0.504092	1.65205	0.999944	1.00466	0.237503	1.06608	0.524078	0.645936	1.07013	0.302563	1.18615	1.06299	1.94442	0.601961
Undefined_PDL1	0.299748	Undefined	PDL1	0.75361	0.212008	0.390812	0.0531749	0.231038	0.142097	0.236181	0.244361	0.142384	0.0706375	0.154188	0.495856	0.24766	0.154514	0.202017	0.0642557	0.286069	0	0	0.249091	0.134593	0.2672	0.145082
Undefined_Tbet	0.61659	Undefined	Tbet	0.75361	0.0827057	0	0	0.0267968	0	0.102679	0.0830045	0	0.0186956	0	0.0052999	0	0.0182987	0	0	0	0	0	0.30023	0	0	0
Septum zoom NKB; ADvsCon	p_val	cluster_id	marker_id	p_adj	control01	control02	ad02	control07	ms02	ms03	ms09	ms04	control03	ad03	ms05	ms07	ms12	control06	ms08	ms10	control08	control11	control09	ad04	control10	ad07
ASCs_CD25 (IL_2R)	0.701155	ASCs	CD25 (IL_2R)	0.880366	2.9932	0.336229		0.691011	0.415034	0.78217	0.390827	0.0452383	2.04612		0.601978	3.84624	2.75591	0.42437	0	0.0547726		0			0.808123	0.0734357
ASCs_CD31/PECAM_1	0.807002	ASCs	CD31/PECAM_1	0.880366	3.31213	1.59636		1.8625	2.20943	2.43741	3.40797	1.02988	1.22055		2.32708	2.31177	1.59907	0.554527	0.735945	2.74656		0.893484			1.8304	1.08967
ASCs_CD45RA	0.420643	ASCs	CD45RA	0.880366	2.97452	1.81293		2.64062	2.27802	1.47755	2.49864	1.9152	2.46412		1.08659	3.14872	2.29995	4.14482	2.47791	1.20074		1.30568			1.1164	3.77626
ASCs_CD45RO	0.571827	ASCs	CD45RO	0.880366	0.0121997	0.239115		0.243554	0.361663	0.537885	0.523002	0.183204	0.333118		0.667675	0.0680189	0.0150977	0.0168968	0.468295	1.09384		0.0281963			0.604	0.517519
ASCs_CD49d	0.653861	ASCs	CD49d	0.880366	5.27646	4.94538		4.90122	4.24173	4.83339	5.39566	4.93633	5.06213		5.09606	5.1063	5.16084	4.70365	4.72446	5.83848		4.94739			5.20218	4.70401
ASCs_CD54	0.717154	ASCs	CD54	0.880366	4.8943	3.2384		3.07106	3.03539	3.50112	4.25225	2.06085	2.95601		3.81039	3.17448	3.11675	2.47927	2.18298	4.06699		3.52446			3.00872	2.60626
ASCs_CD69	0.712853	ASCs	CD69	0.880366	0.64083	0.055172		0.265715	0	1.46884	0.193872	0	0.396663		1.47937	0.248215	0.792085	0.963703	0	1.08841		0.210052			0.117331	0.0818342
ASCs_CD86	0.37573	ASCs	CD86	0.880366	0	0.15063		0.223756	0.156065	0	0.582304	0.061346	0.453162		0.313823	0	0	0.968005	0.933561	0.955047		0.228993			0.692347	1.08012
ASCs_FoxP3	0.533759	ASCs	FoxP3	0.880366	2.67737	2.79125		2.15396	2.26838	1.71975	2.47702	2.7702	2.18084		2.67523	1.39103	0.565048	2.07413	1.83626	2.56288		1.12278			2.12469	2.83447
ASCs_PD1	0.782898	ASCs	PD1	0.880366	1.05196	0		0.00519991	0	0	0	0.0281851	0.319425		0	0	0	0	0	0.0926673		0			0	0
ASCs_PDL1	0.418635	ASCs	PDL1	0.880366	0.432399	0.405219		0.129159	0.204859	0.315538	0.423298	0.232888	0.315121		0.412962	0.339363	0.226763	0.146477	0	0.45114		0			0.474942	0.0788725
ASCs_Tbet	0.92842	ASCs	Tbet	0.92842	0	0.764671		0.66318	0.156754	0.417192	0.844745	0.0652149	0.639466		1.09997	0.345571	0.0725364	0.244546	0.361101	1.20383		0.205354			0.97329	0.54093
B cells_CD25 (IL_2R)	0.00695418	B cells	CD25 (IL_2R)	0.076496	0.0416877	0.238821	0.191512	1.07479	1.07454	0.444597	0.292607	2.59307	0.206969	3.82582	0.609537	3.20507	1.04183	0.207312	0.149045	0.595713	0.422333	0.142613	0	3.27101	0.393561	3.27911
B cells_CD31/PECAM_1	0.506464	B cells	CD31/PECAM_1	0.649877	0.42828	0.120308	0.102615	0.516524	0.0852965	0.145976	0.33604	0	0.146963	0.207116	0.272225	0.0227979	0.103993	0.291648	0.103714	0.620186	0.241253	0.122185	0.129438	0.0404847	0.298737	0.195724
B cells_CD45RA	0.531718	B cells	CD45RA	0.649877	3.94062	3.7116	4.41447	3.65423	3.83568	3.80357	4.34656	3.51513	3.51531	3.62148	4.06315	3.63911	4.05489	4.58022	4.05039	4.86554	4.15075	4.41069	4.1727	3.39618	4.05998	3.64396
B cells_CD45RO	0.861367	B cells	CD45RO	0.912126	0.0626582	0.103316	0.00309998	0.211617	0.0237978	0	0.146278	0	0.0263878	0.283776	0.322006	0.0234978	0.250157	0.128843	0.0469814	0.296892	0.00619996	0.0126997	0.192018	0.0148978	0.365226	0.269082
B cells_CD49d	0.0180929	B cells	CD49d	0.0995109	1.94791	2.47475	2.5127	3.02359	2.85215	2.48703	2.52982	3.73918	1.87989	4.63749	3.27109	4.25986	2.7421	2.47734	1.91721	2.62702	2.58309	2.37445	2.2057	4.43806	2.88824	4.3201
B cells_CD54	0.266971	B cells	CD54	0.489447	0.429013	0.172345	0.562153	0.727663	0.131223	0.34473	0.836555	0	0.25396	0.040389	0.757649	0.132375	0.032393	0.634219	0.383156	0.687293	0.385947	0.164245	0.903543	0.465355	1.13565	0.18966
B cells_CD69	0.531649	B cells	CD69	0.649877	0.376602	0.23891	0.322684	0	0.187892	0.635974	0.315538	0	0.0167968	0	0.543086	0	0.200526	0.337742	0	0.985783	0	2.11082	0.178451	0	0.377379	0.0176991
B cells_CD86	0.0509034	B cells	CD86	0.180962	0	0	0	0	0	0	0	0	0	0.0543732	0.0346929	0	0	0	0	0.00429997	0.00739993	0	0	0.00219999	0.0299955	0.0444848
B cells_FoxP3	0.0658044	B cells	FoxP3	0.180962	1.84198	2.40413	1.16632	1.44533	1.58894	1.39097	1.87484	1.53424	2.03659	0.819237	1.48658	0.786637	0.0728317	1.40394	1.10407	0.981394	1.22856	0.770839	1.9259	1.32025	1.81306	0.69638
B cells_PDL1	0.912126	B cells	PDL1	0.912126	0.104602	0.0423873	0.0546725	0.236392	0.0603633	0.018199	0.00979984	0	0.0102993	0.0151994	0.190545	0.140722	0	0	0.036292	0	0.0601637	0	0.0735337	0.168571	0.0892813	0.116534
B cells_Tbet	0.191896	B cells	Tbet	0.422172	0.158825	0.748441	0.422791	0.280122	0	0.104708	0.936011	0	0	0	0.226704	0.0242953	0.117885	0.875563	0.284542	0.787331	0.18101	0	2.0268	0.0763996	0.559714	0.043182
NK CD56bright_CD25 (IL_2R)	0.00607178	NK CD56bright	CD25 (IL_2R)	0.0667895	0.796177	0	0	0	0.285505	0.212298	0.134494	0.343771	0	0.896145	0.325899	0.100331	0	0.0136994	0	0.136179	0	0.0238909	0	0	0	0.642478
NK CD56bright_CD31/PECAM_1	0.767998	NK CD56bright	CD31/PECAM_1	0.99695	0.274538	0.355091	0.0783184	0.074531	1.53585	1.51113	1.41578	0.350102	0	0.162089	1.92938	1.00343	1.017	0.36157	0.12557	2.20844	0.296439	1.03578	0.260059	0.383177	0.209856	0.0831043
NK CD56bright_CD45RA	0.0584586	NK CD56bright	CD45RA	0.321523	1.09589	0.975669	0.543172	2.25433	0.758845	0.846587	0.950436	0.503261	2.05576	1.06755	0.683519	0.762143	0.101426	2.15315	1.70935	0.891519	2.18596	1.36156	3.57461	0	3.18193	1.28869
NK CD56bright_CD45RO	0.942558	NK CD56bright	CD45RO	0.99695	0.992721	0.389478	0.00299998	0.236587	0.305238	0.321341	0.6761	0.198191	0.221777	0.750836	0.702321	0.134692	0.0705415	0.673704	0.1338	0.675131	0.380735	0.350683	0.31268	0.389058	0.425998	0.569854
NK CD56bright_CD49d	0.881275	NK CD56bright	CD49d	0.99695	2.29224	2.84408	1.963	1.80457	4.10077	4.52714	4.34674	4.33589	1.4105	2.57148	5.01801	4.27447	4.85501	2.20212	2.0334	5.05796	2.2922	3.23296	1.72266	1.87469	2.20343	2.50264
NK CD56bright_CD54	0.974615	NK CD56bright	CD54	0.99695	0.450596	0.828802	0.389756	0.452227	2.10456	2.29881	2.11938	1.26431	0.403372	0.421782	2.54252	2.53952	1.68575	0.986905	0.893273	2.44897	0.924816	1.20422	0.737502	0.742782	0.840925	1.37694
NK CD56bright_CD69	0.501217	NK CD56bright	CD69	0.99695	0.0930656	3.14478	3.63416	0.975405	0.435502	2.04767	0.79979	0.396958	3.49578	0.155769	1.46444	1.48889	1.46797	1.1964	1.92127	1.25627	3.55444	0.886143	3.56235	1.8831	0.984747	3.58165
NK CD56bright_CD86	0.960212	NK CD56bright	CD86	0.99695	0.179829	0	0	0	0.113158	0.00729993	0.0756263	0.0596644	0	0.0259971	0.116834	0.051677	0.0221982	0	0	0.387434	0	0.0876874	0	0.0699714	0	0
NK CD56bright_FoxP3	0.99695	NK CD56bright	FoxP3	0.99695	2.44845	2.06484	0.978365	0.860862	1.78019	1.09326	1.64752	2.26545	0.764977	1.762	2.17794	1.0754	0.27839	0.462165	0.192116	1.79252	0.619757	0.825641	0.999351	0.773333	1.14274	0.728759
NK CD56bright_PDL1	0.67893	NK CD56bright	PDL1	0.99695	0.382597	0.121898	0.0753031	0.126264	0.175892	0.160411	0.350669	0.224314	0.0453844	0.152805	0.318298	0.260542	0.133206	0.030995	0	0.447694	0	0.0708374	0.0245975	0	0.111171	0.191036
NK CD56bright_Tbet	0.337937	NK CD56bright	Tbet	0.99695	0	2.16533	2.6832	2.82946	0.314395	0.559454	0.882119	0.144001	2.21238	0.0633576	0.966129	0.382026	0.177861	1.76477	1.98756	1.1853	2.13872	0.371133	2.53497	1.03215	3.51782	2.24231
NK CD56dim_CD31/PECAM_1	0.775972	NK CD56dim	CD31/PECAM_1	0.948924	0.0613615	0.0661517	0.0144988	0.106001		0.003	0.209661	0	0	0	0.106598	0	0.038876	0.0981424	0.0187989	0.613403	0.0163993	0.0173965	0.0014	0.0151994	0.122692	0.0884828
NK CD56dim_CD45RA	0.948924	NK CD56dim	CD45RA	0.948924	3.98697	3.11038	3.12036	3.45891		4.11504	4.15642	3.66259	3.70097	3.40034	3.5244	3.0257	3.11317	3.32316	3.03363	3.12313	3.97143	3.38022	3.56131	4.05191	3.18648	3.41019
NK CD56dim_CD45RO	0.544453	NK CD56dim	CD45RO	0.948924	0.719811	0.0213984	0	0.0563701		0	0.223729	0	0.0158991	0.00439999	0.0409885	0	0.0014	0.0751293	0	0.140141	0.0245975	0.00849959	0.192803	0	0.259381	0.125762
NK CD56dim_CD49d	0.216499	NK CD56dim	CD49d	0.948924	2.50828	2.09442	1.30965	1.86266		1.50192	2.077	1.07667	1.61138	1.68072	1.72908	0.804102	1.21173	1.84378	1.35857	1.59183	1.58139	1.28339	2.25789	1.11841	2.0829	1.69552
NK CD56dim_CD54	0.537641	NK CD56dim	CD54	0.948924	0.215528	0.136575	0.0361915	0.224314		0.136377	0.293374	0.0729343	0.116735	0.128248	0.265857	0.411489	0.228116	0.333295	0.125272	0.331399	0.0659522	0.222708	0.435318	0.179042	0.160411	0.259762
NK CD56dim_CD69	0.654378	NK CD56dim	CD69	0.948924	3.21896	1.00601	0.186902	0.313442		0.609882	0.647416	0.183128	2.69119	1.27984	0.339066	2.5689	0.501812	1.08816	0.313061	0.615227	0.847022	0.190882	2.98662	0.240087	0.678677	1.01418
NK CD56dim_FoxP3	0.543037	NK CD56dim	FoxP3	0.948924	1.49434	1.59131	0.0835028	0.330927		0.561264	0.699535	1.21211	0.513706	0.834949	1.04334	0.278583	0.185122	0.174119	0.0533747	0.479759	0.413882	0.663371	0.499383	0.136179	0.652994	0.359317
NK CD56dim_PDL1	0.502599	NK CD56dim	PDL1	0.948924	0.248049	0.0681472	0	0.0924682		0.0687458	0.0924682	0	0.0160993	0.102023	0.0892813	0.101028	0	0.0478817	0	0.0959519	0	0.0417717	0.159816	0.00799991	0.163175	0.0641558
NK CD56dim_Tbet	0.939185	NK CD56dim	Tbet	0.948924	3.35161	3.77973	3.79571	3.80308		3.38782	4.23609	2.89291	3.64707	3.69871	4.26637	3.93767	4.0932	3.94638	3.75304	4.35122	3.64618	3.93513	3.61215	3.47335	4.14545	4.17304
Undefined_CD25 (IL_2R)	0.136457	Undefined	CD25 (IL_2R)	0.733816	3.50228	2.10512	3.3578	2.5392	1.49734	1.19177	2.63777	4.25255	1.10781	4.20706	3.30857	2.51405	0.499282	3.09106	4.12711	1.6627	2.65674	0.0283962	3.34699	4.75213	0.922634	3.39968
Undefined_CD31/PECAM_1	0.761982	Undefined	CD31/PECAM_1	0.77147	0.141527	0.0315928	0.254639	0.240961	0.209256	0.242575	0.593943	0	0	0	0.563555	0.0397886	0.0203943	0.158809	0.0657525	0.223136	0.0359922	0	0.114252	0.233473	0.617378	0.17037
Undefined_CD45RA	0.277795	Undefined	CD45RA	0.733816	3.20105	2.47355	3.31132	2.2952	2.53135	1.09277	3.32895	4.15894	2.52122	3.98796	2.98385	2.14669	2.01147	2.60809	4.01508	1.71656	3.13328	3.80714	2.81313	4.34475	3.65591	3.40031
Undefined_CD45RO	0.735525	Undefined	CD45RO	0.77147	0.809907	0.360255	0	0.198984	0.115732	0.41912	0.560932	0	0.0764252	0.327703	0.659459	0.396522	0.11564	0.184543	0.213279	0.15852	0.00779992	0.296056	0	0.565048	0.556583	0.233365
Undefined_CD49d	0.0778253	Undefined	CD49d	0.733816	4.44214	3.79322	4.17996	3.86347	4.0232	4.09584	4.34901	5.0489	2.34032	5.14203	4.49981	4.39861	4.67174	4.15996	5.21528	3.49766	3.57332	3.4064	4.38052	5.83993	3.92129	4.56936
Undefined_CD54	0.630714	Undefined	CD54	0.77147	0	0.332681	0	0.224797	0.85168	1.34127	0.642835	0.0053999	0.0756238	0.100232	0.917212	0.386437	0.723967	0.0605497	1.57877	0.273329	0	0.802312	0	0	1.38252	0.421208
Undefined_CD69	0.77147	Undefined	CD69	0.77147	0.712553	0.0197948	0.0928665	0	0.0312796	0.361013	0	0	0.344195	0	0.00959941	0.00379996	0.0565023	0	0	0	0	2.40656	0.13388	0.310773	0	0
Undefined_CD86	0.664975	Undefined	CD86	0.77147	0.0241976	0	0	0	0.0016	0	0.0513738	0	0	0.0463834	0.0251971	0.0979202	0	0.0269869	0.00899984	0.00909988	0	0.0417878	0.111299	0.0465831	0.0921693	0.079306
Undefined_FoxP3	0.2622	Undefined	FoxP3	0.733816	1.13064	1.9628	0.322006	1.12424	1.2188	1.19799	1.32986	0.598967	0.504092	1.65205	0.999944	1.00466	0.237503	1.06608	0.524078	0.645936	1.07013	0.302563	1.18615	1.06299	1.94442	0.601961
Undefined_PDL1	0.333553	Undefined	PDL1	0.733816	0.212008	0.390812	0.0531749	0.231038	0.142097	0.236181	0.244361	0.142384	0.0706375	0.154188	0.495856	0.24766	0.154514	0.202017	0.0642557	0.286069	0	0	0.249091	0.134593	0.2672	0.145082
Undefined_Tbet	0.645959	Undefined	Tbet	0.77147	0.0827057	0	0	0.0267968	0	0.102679	0.0830045	0	0.0186956	0	0.0052999	0	0.0182987	0	0	0	0	0	0.30023	0	0	0
