# Supplementary material for: Single-cell profiling reveals periventricular CD56bright NK cell accumulation in multiple sclerosis
Source: eLife. 2022 May 10;11:e73849. doi: 10.7554/eLife.73849 (PMC9135404; doi:10.7554/eLife.73849)
Supplement: Source data 2. — Median scaled intensities of the “state” (phenotype) markers for each cell population. [file elife-73849-data2.xlsx]

## Sheet: Proportions
Proportions
CP general MSvsCon
cluster_id	p_val	p_adj	props_control09	props_control10	props_control04	props_control03	props_control07	props_control05	props_control02	props_control08	props_control01	props_control06	props_ms07	props_ms03	props_ms01	props_ms02	props_ms11	props_ms09	props_ms06	props_ms08	props_ms10	props_ms05	props_ms04	props_ad07	props_ad03	props_ad01	props_ad05	props_ad06	props_ad02	props_ad08	props_ad04
Myeloid	0.6475	0.9196	55.5	13.2	34.6	42.3	59.8	35.9	72.5	14.1	27.9	52.9	56.3	43.5	11.9	8.5	70.5	51.2	23.4	50.5	76.1	53.7	58.4	52.4	57.2	56.6	41.5	62.8	63.7	47.1	57.4
Granulocytes	0.7103	0.9196	2.3	61.6	24.6	16.5	21.9	15.1	5.3	73.3	51.6	6.1	6.1	19.8	53.1	68.7	6.3	22.5	68	15.2	0.8	4.4	18.5	12.6	13	34.3	23.3	8.9	1.4	32.3	26.1
Monocytes	0.2395	0.9196	1.9	9.9	4.9	3.8	3.7	4.1	2.5	1.7	8.9	2.6	4.5	4.3	4	6.7	1	2	1.3	2	1.3	4.7	4.5	5.8	4.4	0.9	1.7	3.6	2.2	1.8	2.7
NK cells	0.5911	0.9196	9.2	4.3	5.3	10.7	6	5	5.5	2.2	1.9	7.6	18.9	12.2	9.2	1	3.5	10	2.1	8.2	7.1	7.2	4.3	7.5	4.4	2.9	4.4	8.5	6.7	4	2.4
B cell lineage	0.7883	0.9196	0.4	2.9	0.1	0.7	0.2	11.3	3	0.1	0.2	0.5	0.7	0.9	0.6	0.5	0.2	0.7	0.4	0.7	0.5	1.5	0.3	0.3	0.3	0.1	0.5	1.4	0.6	0.4	0.3
CD8+ T cells	0.669	0.9196	17.5	5.5	23.4	17.3	5.4	10.3	5.6	6.2	5.3	20.8	9.8	9.9	10.2	10.8	9.9	6.7	2.6	15.7	6.8	18.5	8.4	16.4	12.3	2.9	20.5	10.3	18.2	10.9	8
CD4+ T cells	0.9515	0.9515	13.2	2.4	7.1	8.6	2.8	13.1	5.5	2.4	4.2	9.4	3.8	9.2	10.8	1.8	8.5	6.9	2.2	7.8	7.5	10	5.5	5	8.3	2.3	8.1	4.5	7.2	3.5	3
Undefined			0	0.2	0	0	0	5	0	0	0	0	0	0.1	0.1	2	0	0	0	0	0	0	0	0	0.1	0	0	0	0	0.1	0.1
CP general ADvsMS	p_val	p_adj	props_control09	props_control10	props_control04	props_control03	props_control07	props_control05	props_control02	props_control08	props_control01	props_control06	props_ms07	props_ms03	props_ms01	props_ms02	props_ms11	props_ms09	props_ms06	props_ms08	props_ms10	props_ms05	props_ms04	props_ad07	props_ad03	props_ad01	props_ad05	props_ad06	props_ad02	props_ad08	props_ad04
Myeloid	0.2369	0.6223	55.5	13.2	34.6	42.3	59.8	35.9	72.5	14.1	27.9	52.9	56.3	43.5	11.9	8.5	70.5	51.2	23.4	50.5	76.1	53.7	58.4	52.4	57.2	56.6	41.5	62.8	63.7	47.1	57.4
CD4+ T cells	0.4125	0.6223	13.2	2.4	7.1	8.6	2.8	13.1	5.5	2.4	4.2	9.4	3.8	9.2	10.8	1.8	8.5	6.9	2.2	7.8	7.5	10	5.5	5	8.3	2.3	8.1	4.5	7.2	3.5	3
NK cells	0.4096	0.6223	9.2	4.3	5.3	10.7	6	5	5.5	2.2	1.9	7.6	18.9	12.2	9.2	1	3.5	10	2.1	8.2	7.1	7.2	4.3	7.5	4.4	2.9	4.4	8.5	6.7	4	2.4
B cell lineage	0.4	0.6223	0.4	2.9	0.1	0.7	0.2	11.3	3	0.1	0.2	0.5	0.7	0.9	0.6	0.5	0.2	0.7	0.4	0.7	0.5	1.5	0.3	0.3	0.3	0.1	0.5	1.4	0.6	0.4	0.3
CD8+ T cells	0.4445	0.6223	17.5	5.5	23.4	17.3	5.4	10.3	5.6	6.2	5.3	20.8	9.8	9.9	10.2	10.8	9.9	6.7	2.6	15.7	6.8	18.5	8.4	16.4	12.3	2.9	20.5	10.3	18.2	10.9	8
Monocytes	0.6775	0.7904	1.9	9.9	4.9	3.8	3.7	4.1	2.5	1.7	8.9	2.6	4.5	4.3	4	6.7	1	2	1.3	2	1.3	4.7	4.5	5.8	4.4	0.9	1.7	3.6	2.2	1.8	2.7
Granulocytes	0.7968	0.7968	2.3	61.6	24.6	16.5	21.9	15.1	5.3	73.3	51.6	6.1	6.1	19.8	53.1	68.7	6.3	22.5	68	15.2	0.8	4.4	18.5	12.6	13	34.3	23.3	8.9	1.4	32.3	26.1
Undefined			0	0.2	0	0	0	5	0	0	0	0	0	0.1	0.1	2	0	0	0	0	0	0	0	0	0.1	0	0	0	0	0.1	0.1
CP general ADvsCon	p_val	p_adj	props_control09	props_control10	props_control04	props_control03	props_control07	props_control05	props_control02	props_control08	props_control01	props_control06	props_ms07	props_ms03	props_ms01	props_ms02	props_ms11	props_ms09	props_ms06	props_ms08	props_ms10	props_ms05	props_ms04	props_ad07	props_ad03	props_ad01	props_ad05	props_ad06	props_ad02	props_ad08	props_ad04
Myeloid	0.1142	0.476	55.5	13.2	34.6	42.3	59.8	35.9	72.5	14.1	27.9	52.9	56.3	43.5	11.9	8.5	70.5	51.2	23.4	50.5	76.1	53.7	58.4	52.4	57.2	56.6	41.5	62.8	63.7	47.1	57.4
Monocytes	0.136	0.476	1.9	9.9	4.9	3.8	3.7	4.1	2.5	1.7	8.9	2.6	4.5	4.3	4	6.7	1	2	1.3	2	1.3	4.7	4.5	5.8	4.4	0.9	1.7	3.6	2.2	1.8	2.7
B cell lineage	0.284	0.6626	0.4	2.9	0.1	0.7	0.2	11.3	3	0.1	0.2	0.5	0.7	0.9	0.6	0.5	0.2	0.7	0.4	0.7	0.5	1.5	0.3	0.3	0.3	0.1	0.5	1.4	0.6	0.4	0.3
Granulocytes	0.5522	0.7542	2.3	61.6	24.6	16.5	21.9	15.1	5.3	73.3	51.6	6.1	6.1	19.8	53.1	68.7	6.3	22.5	68	15.2	0.8	4.4	18.5	12.6	13	34.3	23.3	8.9	1.4	32.3	26.1
CD4+ T cells	0.4551	0.7542	13.2	2.4	7.1	8.6	2.8	13.1	5.5	2.4	4.2	9.4	3.8	9.2	10.8	1.8	8.5	6.9	2.2	7.8	7.5	10	5.5	5	8.3	2.3	8.1	4.5	7.2	3.5	3
NK cells	0.7542	0.7542	9.2	4.3	5.3	10.7	6	5	5.5	2.2	1.9	7.6	18.9	12.2	9.2	1	3.5	10	2.1	8.2	7.1	7.2	4.3	7.5	4.4	2.9	4.4	8.5	6.7	4	2.4
CD8+ T cells	0.7225	0.7542	17.5	5.5	23.4	17.3	5.4	10.3	5.6	6.2	5.3	20.8	9.8	9.9	10.2	10.8	9.9	6.7	2.6	15.7	6.8	18.5	8.4	16.4	12.3	2.9	20.5	10.3	18.2	10.9	8
Undefined			0	0.2	0	0	0	5	0	0	0	0	0	0.1	0.1	2	0	0	0	0	0	0	0	0	0.1	0	0	0	0	0.1	0.1

## Sheet: Expression
Expression
unique
CP general populations; MSvsCon	p_val	cluster_id	marker_id	p_adj	ad07	ms07	control09	ms03	ms01	control10	ms02	ms11	control04	ad03	ms09	ad01	ad05	ad06	ms06	control03	ms08	control07	ms10	ms05	control05	control02	ad02	ms04	control08	control01	control06	ad08	ad04
B cell lineage_CD25 (IL_2R)	0.742405	B cell lineage	CD25 (IL_2R)	0.7625	3.42918	0.343033	0.294619	0.615997	0.157152	0.0689454	0.511322	0.0514772	0.913391	0.592487	0.297014	0.169586	0.394118	0.590213	0.288194	0.296822	0.250762	0.436779	0.409186	0.328272	0.279449	0.344731	0.182781	0.526294	0.165244	0.137566	0.320486	0.293565	0.356406
B cell lineage_CD31/PECAM_1	0.00853354	B cell lineage	CD31/PECAM_1	0.0853354	0.283223	0.141527	0.139448	0.16574	0.212399	0.0647547	0.308881	0.287408	0.280507	0.22168	0.389664	0.363914	0.256188	0.195257	0.861866	0.194177	0.407894	0.224899	0.571652	0.457294	0.210345	0.176679	0.3332	0.119116	0.24067	0.402448	0.371776	0.382597	0.546576
B cell lineage_CD45RA	0.525661	B cell lineage	CD45RA	0.750944	3.29312	4.10499	3.52871	4.02397	4.04953	3.99947	3.65393	4.27494	3.03726	4.06349	3.88326	3.86987	3.77658	3.78452	3.58487	3.93714	3.96131	3.96132	4.64353	4.02378	4.18054	3.78353	4.50604	3.92031	4.13225	4.03557	3.97467	4.49569	3.97894
B cell lineage_CD45RO	0.108582	B cell lineage	CD45RO	0.271456	0.0306807	0.0083999	0.113854	0.0593651	0.0874884	0	0.0158988	0.146179	0.211421	0.0725364	0.240476	0.368222	0.195748	0.0208985	0.694587	0.0970476	0.306002	0.262186	0.296535	0.15656	0.0425871	0.109581	0.0271966	0	0.322058	0.0771235	0.180223	0.0263969	0.186517
B cell lineage_CD49d	0.049133	B cell lineage	CD49d	0.245665	4.60122	2.0056	2.17548	2.40571	1.56676	1.81121	2.25649	2.27471	2.41106	2.22427	2.19814	2.25827	2.15395	2.02324	2.90898	1.77704	2.33434	2.64911	2.49831	2.72693	1.78582	2.14736	2.54765	2.05821	2.17679	1.63693	2.53409	1.83027	2.15797
B cell lineage_CD54	0.0817285	B cell lineage	CD54	0.271456	0.377908	0.567452	0.448964	0.375532	0.655123	0.390035	0.577954	0.595693	0.345486	0.483622	0.626254	0.499028	0.473686	0.075229	1.30386	0.662958	0.92001	0.834072	0.727233	1.03264	0.363539	0.455848	0.482285	0.253943	1.25911	0.586579	0.424716	0.3839	0.676909
B cell lineage_CD69	0.363217	B cell lineage	CD69	0.605362	0	0.27049	0.0891817	0.0505782	0.15972	0	0	0.134186	0.127851	0	0.247466	0.308866	0.227044	0.434862	0.228214	0.565564	0.0555714	0	0.564615	0.523376	0.322862	0.236392	0.254252	0	0.15231	0.204766	0.176876	0.0209985	0.032994
B cell lineage_CD86	0.7625	B cell lineage	CD86	0.7625	0.00999933	0	0	0	0	0	0.0301952	0	0	0	0	0.100431	0	0	0.410015	0	0	0.0501789	0.0293957	0.0397895	0	0	0.0022	0	0.366895	0	0	0	0
B cell lineage_FoxP3	0.620203	B cell lineage	FoxP3	0.7625	0.357492	0.421049	1.82185	0.954492	1.76686	0.839179	2.43889	1.42817	2.1477	1.2682	1.69595	1.82939	1.4849	2.16264	2.28835	1.87861	1.39281	1.83557	1.08003	1.6874	1.25427	2.34864	1.5597	1.56221	2.22966	1.51155	1.15162	1.40681	1.21468
B cell lineage_Tbet	0.263134	B cell lineage	Tbet	0.526268	0	0.100033	0.315252	0	0.281276	0.487464	0.144694	0.0887833	0.308675	0.200739	0.461448	0.189464	0.0409885	0.0593651	0.294715	0.41112	0.197611	0.28416	0.494054	0.426547	0.335756	0.841216	0.725625	0.0277963	0.701683	0.001	0.37215	0.00439999	0.0930656
CD4+ T cells_CD25 (IL_2R)	0.090071	CD4+ T cells	CD25 (IL_2R)	0.540426	0	0	0	0.073434	0	0	0.507882	0.0921694	0.0853962	0.299311	0.244555	0.433221	0.00879989	0.409831	0.221192	0.0908749	0.155967	0.12805	0.413882	0.393376	0.422699	0.355749	0.0773229	0.502131	0	0.0569692	0.0625592	0.189563	0.0785193
CD4+ T cells_CD28	0.19634	CD4+ T cells	CD28	0.589021	0.317251	1.01148	0.764212	1.64109	0.617084	1.18653	0.754152	1.55008	1.09089	1.51164	1.46665	1.74312	1.5251	1.35838	1.76314	1.19099	1.77819	1.07906	1.79859	1.66349	1.78114	1.73928	1.58454	1.39427	0.844122	1.71905	1.4448	1.59015	1.06139
CD4+ T cells_CD31/PECAM_1	0.52477	CD4+ T cells	CD31/PECAM_1	0.811364	0	0.064156	0.0617607	0.0862929	0.0317946	0.0737332	0.103714	0.202905	0.160806	0.178451	0.0854958	0.208584	0.27839	0.101028	0.298163	0.0673491	0.274635	0.0821077	0.363352	0.033094	0.0467829	0.0840012	0.139547	0.0579675	0.284353	0.231915	0.236198	0.346523	0.34624
CD4+ T cells_CD45RA	0.849877	CD4+ T cells	CD45RA	0.882864	0	0.202219	0.817908	0.276465	0.50346	0.377192	1.21052	0.298737	0.41563	0.47781	0.453676	0.433312	0.420865	0.323527	0.561092	0.345297	0.52767	0.483357	0.47548	0.250667	0.256769	0.34492	0.408725	0.206626	0.484965	0.337364	0.368971	3.31802	0.551427
CD4+ T cells_CD45RO	0.659144	CD4+ T cells	CD45RO	0.811364	2.89976	3.07664	2.08212	3.46547	2.84834	2.91691	2.05439	3.56169	3.26393	3.53942	3.40221	3.20681	3.48607	2.99715	3.21854	3.57254	3.24514	3.17411	3.7883	3.45846	3.16657	3.55875	3.5975	2.9867	3.65805	3.17208	3.119	2.43554	3.2414
CD4+ T cells_CD49d	0.291778	CD4+ T cells	CD49d	0.700268	0.370092	0.79047	1.9467	1.69282	1.82028	1.36616	1.85465	1.78556	1.12225	1.8448	2.00444	2.07653	1.56244	1.59121	1.54487	1.3829	2.13752	1.84246	2.35183	1.78699	1.67183	1.7103	2.05963	1.51918	1.72756	1.33509	2.23586	1.23994	1.76354
CD4+ T cells_CD54	0.604927	CD4+ T cells	CD54	0.811364	0.00539997	0.210052	0.171163	0.0633576	0.113158	0.003	0.018299	0.0550722	0.144497	0.111171	0.0948577	0.121997	0.192214	0	0.321246	0.131223	0.275405	0.0862929	0.283392	0.0428868	0.0719379	0.047582	0.0833036	0	0.514235	0.00759993	0.118125	0.045784	0.221973
CD4+ T cells_CD69	0.0701076	CD4+ T cells	CD69	0.540426	3.04327	3.38906	2.26958	2.4656	0.848614	0.43459	3.19888	2.06202	3.22523	1.83856	1.10929	1.92118	3.15237	3.15348	2.11517	2.40988	2.51741	2.52528	2.03356	0.889904	2.77278	2.77839	1.80226	2.08371	3.19928	2.22125	2.30717	2.1183	2.36956
CD4+ T cells_FoxP3	0.676136	CD4+ T cells	FoxP3	0.811364	0.113754	0.00379999	0.729385	0.246399	0.476556	0.259865	0.481301	0.509119	0.348785	0.684485	0.793026	0.767957	0.417927	0.758076	1.09829	0.825571	0.361664	0.436961	0.384273	0.731653	0.435046	1.4548	0.810501	0.431851	0.737347	0.522499	0.474942	0.355843	0.231331
CD4+ T cells_Gata3	0.374728	CD4+ T cells	Gata3	0.749457	0	0.108586	0.537014	0.158634	0.258318	0.00759993	0.086791	0.643385	0.668325	0.509472	0.460365	0.576954	0.374019	0.518459	0.234446	0.395786	0.573878	0.382225	1.0221	0.660758	0.327608	0.814653	0.889552	0.320295	0.1062	0.419764	0.561092	0.226264	0.262379
CD4+ T cells_PD1	0.151647	CD4+ T cells	PD1	0.589021	1.33163	1.12348	1.02745	1.73901	0.264891	0.327703	2.06762	1.39781	2.51605	1.52294	1.08575	1.5896	2.87683	1.41831	1.65101	2.56349	1.79452	2.23577	1.35751	0.923445	2.10406	1.6636	1.40866	1.01168	2.5923	0.723427	1.51407	0.854679	1.88652
CD4+ T cells_Tbet	0.882864	CD4+ T cells	Tbet	0.882864	0.57832	0.76513	2.00243	0.520392	1.46989	0.281469	1.29536	1.07821	1.14285	0.906602	0.844993	0.645031	0.634716	0.398193	0.901035	1.15747	1.03283	1.33105	1.21238	0.54154	0.253671	1.01847	1.5434	0.379709	1.32302	0.706692	0.942115	0.369345	1.09769
CD8+ T cells_CD28	0.484482	CD8+ T cells	CD28	0.983122	0.142121	0.35791	0.216016	0.361852	0.1062	0	0.586239	0.233668	0.481212	0.378871	0.666375	0.3596	1.26713	0.535358	1.05668	0.337837	1.30512	0.460726	0.450596	0.231331	0.968653	0.727584	0.661003	0.598942	0.454219	0.320105	0.699216	0.792876	0.111767
CD8+ T cells_CD31/PECAM_1	0.0476062	CD8+ T cells	CD31/PECAM_1	0.425663	0.0902773	0.165444	0.318108	0.272225	0.430481	0.103217	0.23396	0.624341	0.55592	0.394303	0.692667	0.606691	0.683037	0.513442	0.655368	0.139844	0.828655	0.530556	0.976197	0.65684	0.500802	0.70272	0.725782	0.393376	0.50523	0.402448	0.660187	0.771542	0.354903
CD8+ T cells_CD45RA	0.722077	CD8+ T cells	CD45RA	0.983122	0.0158993	0.305429	2.15525	0.442243	1.61905	2.33796	0.675615	0.470363	0.454219	0.526006	0.552378	0.755615	0.451865	0.574818	0.763675	0.407065	0.649879	0.673189	0.746662	0.324856	0.381107	0.302658	0.462531	0.630241	0.905629	0.535271	0.617753	3.6208	1.78634
CD8+ T cells_CD45RO	0.180582	CD8+ T cells	CD45RO	0.541746	1.94032	2.28919	0.526444	2.77043	1.08738	0.29414	2.24086	2.76495	2.90268	3.01576	3.18273	2.16114	3.33849	1.50945	2.32369	2.84451	3.07962	2.20887	3.04695	3.56005	2.94138	3.7113	3.13715	1.8922	2.41294	1.97071	1.68797	1.50048	1.12642
CD8+ T cells_CD49d	0.91232	CD8+ T cells	CD49d	0.983122	0.422516	0.828215	1.6655	1.49588	1.44783	1.75753	1.56544	1.48529	1.19742	1.58123	1.81518	1.71495	1.50877	1.19941	1.49464	1.46472	1.88531	1.46297	1.95262	1.46297	1.33882	1.58383	1.8086	1.30031	1.71089	1.39052	2.20891	1.00375	1.77533
CD8+ T cells_CD54	0.0945917	CD8+ T cells	CD54	0.425663	0.0911736	0.254252	0.285698	0.080513	0.243972	0.0337936	0.0528754	0.181502	0.209465	0.309629	0.184944	0.265761	0.28781	0	0.405127	0.199376	0.371309	0.107195	0.815542	0.297588	0.099038	0.116437	0.226264	0	0.578234	0.0938621	0.19614	0.103416	0.514058
CD8+ T cells_CD69	0.811853	CD8+ T cells	CD69	0.983122	3.19102	3.50306	2.68865	2.65504	1.29823	0.421232	3.51484	3.52181	3.38824	3.70966	3.55598	3.22011	3.61404	3.68511	2.47102	2.93147	3.15825	3.56914	4.08443	3.48408	3.53023	4.04957	3.84073	4.0003	3.52331	3.02835	3.17439	3.81004	3.32041
CD8+ T cells_PD1	0.807718	CD8+ T cells	PD1	0.983122	1.52817	1.16363	0.834072	1.72197	0.370374	0.0607626	3.07111	1.22753	2.67649	2.12671	2.63158	2.36085	2.95906	2.22875	1.85227	2.6665	1.83759	2.47687	2.57151	2.1719	2.3571	2.80443	2.23873	1.79089	1.81191	2.3115	1.77658	1.91312	0.778838
CD8+ T cells_Tbet	0.983122	CD8+ T cells	Tbet	0.983122	0.949674	0.796777	2.26858	0.70272	1.67158	1.45015	1.18261	1.73213	1.32481	1.43204	1.31378	1.23571	0.821007	0.593109	1.06558	1.52776	1.14903	1.36367	1.99583	1.38101	0.787909	1.18395	2.07324	0.653486	1.32996	1.29727	1.39529	0.770475	1.48438
Granulocytes_CD31/PECAM_1	0.0506144	Granulocytes	CD31/PECAM_1	0.202457	0.51714	0.490049	0.842379	0.72782	0.570025	0.471172	0.806487	1.36261	0.858995	1.02096	0.710971	1.22932	1.05935	0.735945	1.30901	0.57977	1.49929	0.921522	1.54572	1.27036	0.838159	0.927486	1.46534	0.610721	0.971305	1.1256	1.05432	1.07479	0.816429
Granulocytes_CD49d	0.990319	Granulocytes	CD49d	0.990319	0.605513	1.08653	1.29788	1.12378	1.16784	2.81241	2.57414	1.04797	0.741079	1.99193	0.982385	1.46871	1.10344	1.27716	1.28263	1.65138	1.46626	1.2588	1.36554	0.98061	0.908476	0.952766	1.16659	0.812727	1.02198	1.24309	1.20745	1.15644	1.49554
Granulocytes_CD54	0.199462	Granulocytes	CD54	0.398925	0.203297	1.40186	0.669137	1.13186	0.56092	0.508942	0.36035	1.03894	0.573792	0.866589	0.43933	1.14476	0.743873	0.405219	0.930971	0.397823	1.28751	0.390221	1.16162	0.587853	0.587598	0.404757	0.6319	0.533962	1.24335	0.910485	0.841943	0.663447	0.736724
Granulocytes_CD86	0.30485	Granulocytes	CD86	0.406466	0.33462	0.312871	0.135188	0.452227	0.753074	0.559714	0.269235	0.614575	0.495121	0.567624	0.620591	0.796777	0.545535	0.414342	1.19853	0.259478	1.19554	0.446968	0.818055	0.354338	0.386877	0.190054	0.633888	0.267402	1.33853	0.626919	0.752534	0.696344	0.618254
Monocytes_CD25 (IL_2R)	0.0265159	Monocytes	CD25 (IL_2R)	0.0697819	1.40993	0.562469	2.65463	2.42358	1.21903	0.080812	2.69585	2.44546	0.706533	1.48326	2.16275	0.980075	0.674969	1.49169	2.31667	1.12331	1.5962	0.872578	2.90496	3.68312	2.79923	1.69353	3.04975	0.737502	0.0847983	0.425174	2.07883	0.786401	1.69375
Monocytes_CD31/PECAM_1	0.216626	Monocytes	CD31/PECAM_1	0.25273	1.09949	1.03226	0.908454	0.991156	1.79316	0.849844	1.09396	0.908684	2.4709	1.52202	2.18578	2.41338	1.91552	1.60087	1.05618	1.44547	2.00017	2.64497	0.507086	0.351516	0.381107	2.02959	0.487018	2.18196	1.8854	2.44996	1.36932	2.57243	2.44797
Monocytes_CD36	0.113184	Monocytes	CD36	0.158458	2.86814	2.72042	1.39194	1.20405	3.54283	3.1893	1.87923	0.371028	3.75456	2.9826	3.25379	3.45764	2.53194	0.304856	1.07991	2.39302	3.5089	3.63378	0	0	0.121699	3.08258	0	3.05776	3.42782	3.82563	2.46445	3.56647	3.06746
Monocytes_CD45RA	0.0288947	Monocytes	CD45RA	0.0697819	1.13116	0.676747	2.09927	2.00359	1.34176	0.630158	2.20356	1.90869	1.50709	1.49647	1.96786	1.77638	1.76773	1.49023	1.98343	1.20537	1.6074	1.37332	2.11172	2.86813	2.01272	1.79536	2.27085	1.10822	0.771466	0.83845	1.6663	3.31837	2.28557
Monocytes_CD49d	0.0299065	Monocytes	CD49d	0.0697819	3.12033	2.70565	3.60196	3.84931	2.52216	1.60149	3.42894	3.52435	2.01902	2.69664	3.60895	2.80055	2.26864	3.29774	3.30405	2.58184	2.9336	2.63042	3.40308	4.32908	3.64752	3.37167	3.66992	2.92792	2.3048	2.29705	3.19143	2.59589	3.22471
Monocytes_CD54	0.627974	Monocytes	CD54	0.627974	1.03863	3.44073	0.871901	1.09697	1.82701	0.902429	0.497253	0.804102	2.32468	0.912423	1.50048	1.8119	2.14401	0.652667	1.00065	1.03542	1.82642	1.41257	0.195649	0.174316	0.339255	0.960399	0.191134	1.48851	2.59653	1.57696	0.647744	1.85346	1.44023
Monocytes_CD86	0.0551872	Monocytes	CD86	0.0965776	0.121501	0.383714	0.36869	0.199867	0.403187	0.383063	0.0543732	0.335472	1.13682	0.353022	0.53684	0.839397	0.166036	0.464514	0.417376	0.152903	0.535794	0.798948	0	0	0.0493799	0.781262	0	0.794527	0.843469	1.31453	0.299694	0.45874	0.368035
Myeloid_CD25 (IL_2R)	0.0671148	Myeloid	CD25 (IL_2R)	0.216009	1.55873	2.11024	2.57282	1.78111	2.51856	0.737502	1.71815	2.56914	2.02794	2.97044	2.86896	1.87616	2.09888	1.14725	3.52511	2.8868	2.77724	3.0173	3.25558	3.66048	3.3145	2.66896	3.52181	1.38526	0.554884	1.19026	3.13829	1.8606	1.61412
Myeloid_CD31/PECAM_1	0.0810032	Myeloid	CD31/PECAM_1	0.216009	0.525305	1.25638	1.69126	1.23914	1.55405	0.82513	1.27041	2.41009	1.81971	1.55365	1.94188	1.90776	1.49306	1.71453	1.81895	0.915601	1.98291	2.14627	2.63791	2.06049	1.18283	1.96126	2.52805	1.38968	1.65982	1.63024	2.02397	1.80258	1.67697
Myeloid_CD36	0.487093	Myeloid	CD36	0.649458	0	0	0.124081	0.0790177	0.343222	0.178058	0.0595648	0.114351	0.246302	0.136377	0.138358	0.261993	0.180616	0.0018	0.624757	0.0469827	0.485055	0.308102	0.349445	0.238726	0.0419877	0.121501	0.251248	0.0133996	0.734541	0.0958532	0.348503	0.246884	0.285121
Myeloid_CD49d	0.0781887	Myeloid	CD49d	0.216009	3.74161	3.85151	3.88252	3.92181	4.15993	2.74069	3.2402	4.34024	3.67462	4.5684	3.93069	3.58823	3.64267	2.79788	4.64521	4.13765	4.11005	4.28759	4.79437	4.62531	4.48323	4.23399	4.51008	3.75452	3.0993	3.66674	4.49172	3.8812	3.8095
Myeloid_CD54	0.471834	Myeloid	CD54	0.649458	1.14326	1.93474	1.9865	1.68274	2.03235	1.308	1.87915	1.69638	2.44553	1.32222	1.86841	2.01738	2.45785	0.610889	2.59316	2.21017	2.49568	1.957	2.69065	1.93553	1.54601	1.28345	2.2129	1.2937	3.53737	1.40464	1.91385	2.63691	2.41415
Myeloid_CD69	0.298592	Myeloid	CD69	0.597184	0.0494798	0.848108	0.324476	0.718393	0.253477	0.0659522	0.162484	1.7475	0.906741	1.32946	0.724056	0.956254	0.512384	1.26572	0.272418	0.196336	0.448783	0.74821	1.93273	0.632894	0.3402	0.927828	0.824395	1.42597	0.470812	0.851433	0.955383	1.01482	1.32391
Myeloid_CD86	0.954517	Myeloid	CD86	0.954517	0.113556	0.414986	0.582156	0.380828	0.582922	0.285505	0.588447	0.782322	1.06293	0.741079	0.618421	0.93832	0.748364	0.405773	1.12313	0.761454	0.970112	0.883352	1.05817	0.581474	0.382504	0.684806	0.712474	0.44106	1.69036	0.850783	0.545709	0.571909	0.531954
Myeloid_PDL1	0.892077	Myeloid	PDL1	0.954517	0	0.137368	0.114351	0.0828053	0.164458	0.0902773	0.129042	0.14608	0.203982	0.143111	0.121699	0.27049	0.152409	0.0327941	0.484251	0.175695	0.24339	0.162681	0.339255	0.117529	0.0670498	0.107791	0.118324	0.0165992	0.797077	0.188286	0.166431	0.173725	0.163668
NK cells_CD25 (IL_2R)	0.0073963	NK cells	CD25 (IL_2R)	0.0332833	0.217872	0	0	0.196532	0	0	0.683825	1.02706	0.108487	0.0959527	0.0771235	0.0689454	0	0.515907	1.32833	0	0.217482	0.0635572	0.444425	0.0771235	0.188089	0.0441856	0.0275965	0.629826	0	0.154781	0.0246975	0	0.0451846
NK cells_CD31/PECAM_1	0.0947493	NK cells	CD31/PECAM_1	0.223055	0.00459998	0.00869989	0.0740323	0.152014	0.0689454	0.0737332	0.173724	0.435776	0.157251	0.211324	0.119912	0.28243	0.205941	0.0748301	0.435138	0.0809117	0.229773	0.120905	0.5337	0.173922	0.0323943	0.180813	0.249697	0.0476819	0.269332	0.30218	0.222461	0.20692	0.227532
NK cells_CD45RA	0.643199	NK cells	CD45RA	0.643199	1.10535	2.50658	2.69271	2.10538	3.45921	2.921	1.4656	1.64221	3.18286	2.82913	3.11247	2.53182	2.1977	1.86336	2.23829	2.5518	2.33968	2.62397	2.16585	2.76002	2.22425	2.53112	3.02183	2.23372	2.96929	1.6319	2.6841	3.29443	3.51305
NK cells_CD45RO	0.100104	NK cells	CD45RO	0.223055	0	0.0189989	0.131025	0.0771235	0.0553717	0.0579675	0.21367	0.435776	0.221094	0.251345	0.17274	0.379057	0.310583	0.167417	0.611559	0.12299	0.367099	0.252024	0.491741	0.152805	0.0807123	0.165444	0.212986	0.135881	0.322196	0.414986	0.129637	0.150135	0.24407
NK cells_CD49d	0.12392	NK cells	CD49d	0.223055	1.43113	0.888216	1.5698	1.52933	1.27897	1.04822	2.0869	2.28975	1.71794	2.03598	1.91003	1.94597	1.74519	1.78807	2.72222	1.68793	2.06149	1.7603	1.86297	1.54438	1.68546	1.87992	1.88457	2.14142	1.91413	1.48378	1.81731	1.43767	1.91909
NK cells_CD54	0.0040331	NK cells	CD54	0.0332833	0.229383	0.998702	0.451865	0.805742	0.278294	0.215527	0.331685	0.823438	0.480854	0.379337	0.606019	0.786401	1.07222	0.361383	1.20487	0.534486	1.06731	0.630158	1.20046	0.676747	0.830268	0.463432	0.679975	0.540844	0.623924	0.388735	0.517931	0.664017	0.67933
NK cells_CD69	0.556323	NK cells	CD69	0.625863	0.186124	3.52942	0.848325	2.90746	0.380828	0.380362	0.0712387	0.0833036	2.51248	0.632314	0.70065	1.64232	3.27344	3.24352	0.28368	2.84913	2.60134	3.01465	3.12765	0.975272	1.90282	2.24583	1.80933	3.31495	2.62675	2.08663	0.882151	3.27604	0.439148
NK cells_PDL1	0.446703	NK cells	PDL1	0.574332	0	0.057668	0.0488805	0.003	0.136179	0.00339999	0.120806	0.281661	0.258221	0.190839	0.0844994	0.235614	0.0785193	0.135881	0.677797	0.0401892	0.0920699	0.141725	0.247272	0.0481814	0.0271966	0.0817091	0.100033	0.214159	0.580622	0.0769241	0.0893809	0.0647547	0.137962
NK cells_Tbet	0.306145	NK cells	Tbet	0.459218	0.183764	1.50133	2.87295	1.03617	2.90906	1.42551	0.230161	0.205256	3.03926	2.62712	2.76472	1.56636	1.15289	0.475749	0.423341	1.60732	1.39221	1.37864	1.94771	2.12171	1.05183	2.10225	3.16928	0.487374	2.34171	1.32669	2.26248	1.46125	2.06987
Undefined_CD25 (IL_2R)	0.0654442	Undefined	CD25 (IL_2R)	0.198627	5.41866	3.64721	0.763906	3.8857	3.82419	4.22298	4.16941	1.24066	3.58149	3.93073	3.82153	3.69218	3.81929	3.59199	3.60402	3.65144	3.60733	3.97222	3.74055	3.53196	0.356782	3.86554	3.71091	4.0827	1.73682	3.66778	3.49994	4.14213	3.75988
Undefined_CD28	0.104981	Undefined	CD28	0.251955	0	0	0.832171	0.0673057	0	0	0	1.417	0.623327	0.0101998	0.141131	0.136773	0	0	0.00579997	0	0.0384644	0	0.0365918	0.707562	1.69382	0	0.195748	0.261412	2.3324	0.0763259	0	0.0422848	0.130232
Undefined_CD31/PECAM_1	0.648013	Undefined	CD31/PECAM_1	0.777615	0	0.00519998	0.366163	0.193972	0.126937	0.00519997	0.190053	1.39291	0.742216	0.600538	0.578234	0.350951	0.280699	0	0.564705	0.318583	0.760833	0.132809	0.701128	0.490346	0.512472	0.463973	0.889974	0	2.17278	0.205158	0.41123	0.412798	0.339822
Undefined_CD36	0.291821	Undefined	CD36	0.437732	0	0	0	0.0763283	0.0130994	0.0678455	0	0.0692781	0.224408	0.378181	0.0559708	0.463432	0	0.690265	0.396342	0	0.0004	0.0609622	0	0	0	0.383521	0	0	0.317251	0	0.352782	0.207887	0.101625
Undefined_CD45RA	0.0271867	Undefined	CD45RA	0.16312	5.00502	2.95682	0.67707	3.09201	2.8308	3.42983	3.42012	1.35602	2.22174	3.13625	3.3058	3.07577	3.14406	2.50983	2.62724	2.46732	2.98408	3.0797	2.98877	2.67161	0.159523	2.83174	3.16267	3.26104	0.810353	2.72065	2.98001	3.40811	3.14289
Undefined_CD45RO	0.128062	Undefined	CD45RO	0.256124	1.326	1.03592	2.97975	1.42582	1.62422	0.587145	1.00504	3.26014	2.4088	1.1892	1.37684	1.21293	1.13996	0.545535	1.6743	2.26318	1.03815	1.31142	1.41977	1.85624	3.30364	1.04757	1.63453	1.36463	3.95773	1.28253	1.04945	1.0836	1.32112
Undefined_CD49d	0.0213733	Undefined	CD49d	0.16312	6.30423	4.28894	1.11451	4.21214	3.87476	4.56772	4.58848	1.67986	3.55115	4.37903	3.90468	4.17065	4.26643	3.87049	3.9419	3.08295	4.11135	3.77412	4.17416	4.22855	0.699535	4.05881	4.39645	4.43464	1.56396	3.99931	4.185	4.4702	4.16808
Undefined_CD54	0.341184	Undefined	CD54	0.454912	0.997794	0	0.618087	0.230051	0.141912	0	0	1.01559	0.606376	0	0.240087	0.115543	0	0	0.204374	0.144497	0.381486	0	0.186124	0.296715	0.63984	0.0519283	0.484072	0.0131996	1.25311	0.0453844	0.166317	0	0.070342
Undefined_CD86	0.177236	Undefined	CD86	0.303833	0	0	0.0946586	0.392693	0.0774207	0	0	2.44089	0.102579	0.0950564	0.442425	0	0.0579675	0	0.331306	0.311917	0	0	0.365788	0.41271	2.26326	0	0.288386	0	3.16471	0.121104	0.0930457	0	0.0617607
Undefined_FoxP3	0.82243	Undefined	FoxP3	0.82243	0.698419	0	0.0445852	0.0257902	0	0	0.0992368	0.536608	0.0177962	0	0.308102	0	0.0157993	0	0	0	0	0	0	0.0268963	0.122096	0	0.130628	0	0.18219	0	0	0	0
Undefined_Gata3	0.734532	Undefined	Gata3	0.801308	0.165247	0	0.112562	0	0	0	0	0.278793	0.0910568	0	0	0	0.0481814	0	0	0	0	0	0.494232	0.0290957	0.114748	0	0.136377	0	0.468115	0	0.13521	0	0
Undefined_PDL1	0.0662089	Undefined	PDL1	0.198627	0.93138	0.0623596	2.30155	0.00689978	0	0	0	3.38458	0.145287	0	0.0493799	0	0	0	0.144101	0	0	0	0	0.294494	3.29561	0	0.139547	0	4.15124	0	0.0117997	0.0438823	0.00479998
CP general populations; ADvsCon	p_val	cluster_id	marker_id	p_adj	ad07	ms07	control09	ms03	ms01	control10	ms02	ms11	control04	ad03	ms09	ad01	ad05	ad06	ms06	control03	ms08	control07	ms10	ms05	control05	control02	ad02	ms04	control08	control01	control06	ad08	ad04
B cell lineage_CD25 (IL_2R)	0.509711	B cell lineage	CD25 (IL_2R)	0.652862	3.42918	0.343033	0.294619	0.615997	0.157152	0.0689454	0.511322	0.0514772	0.913391	0.592487	0.297014	0.169586	0.394118	0.590213	0.288194	0.296822	0.250762	0.436779	0.409186	0.328272	0.279449	0.344731	0.182781	0.526294	0.165244	0.137566	0.320486	0.293565	0.356406
B cell lineage_CD31/PECAM_1	0.243387	B cell lineage	CD31/PECAM_1	0.652862	0.283223	0.141527	0.139448	0.16574	0.212399	0.0647547	0.308881	0.287408	0.280507	0.22168	0.389664	0.363914	0.256188	0.195257	0.861866	0.194177	0.407894	0.224899	0.571652	0.457294	0.210345	0.176679	0.3332	0.119116	0.24067	0.402448	0.371776	0.382597	0.546576
B cell lineage_CD45RA	0.403857	B cell lineage	CD45RA	0.652862	3.29312	4.10499	3.52871	4.02397	4.04953	3.99947	3.65393	4.27494	3.03726	4.06349	3.88326	3.86987	3.77658	3.78452	3.58487	3.93714	3.96131	3.96132	4.64353	4.02378	4.18054	3.78353	4.50604	3.92031	4.13225	4.03557	3.97467	4.49569	3.97894
B cell lineage_CD45RO	0.981469	B cell lineage	CD45RO	0.981469	0.0306807	0.0083999	0.113854	0.0593651	0.0874884	0	0.0158988	0.146179	0.211421	0.0725364	0.240476	0.368222	0.195748	0.0208985	0.694587	0.0970476	0.306002	0.262186	0.296535	0.15656	0.0425871	0.109581	0.0271966	0	0.322058	0.0771235	0.180223	0.0263969	0.186517
B cell lineage_CD49d	0.394545	B cell lineage	CD49d	0.652862	4.60122	2.0056	2.17548	2.40571	1.56676	1.81121	2.25649	2.27471	2.41106	2.22427	2.19814	2.25827	2.15395	2.02324	2.90898	1.77704	2.33434	2.64911	2.49831	2.72693	1.78582	2.14736	2.54765	2.05821	2.17679	1.63693	2.53409	1.83027	2.15797
B cell lineage_CD54	0.274557	B cell lineage	CD54	0.652862	0.377908	0.567452	0.448964	0.375532	0.655123	0.390035	0.577954	0.595693	0.345486	0.483622	0.626254	0.499028	0.473686	0.075229	1.30386	0.662958	0.92001	0.834072	0.727233	1.03264	0.363539	0.455848	0.482285	0.253943	1.25911	0.586579	0.424716	0.3839	0.676909
B cell lineage_CD69	0.885043	B cell lineage	CD69	0.981469	0	0.27049	0.0891817	0.0505782	0.15972	0	0	0.134186	0.127851	0	0.247466	0.308866	0.227044	0.434862	0.228214	0.565564	0.0555714	0	0.564615	0.523376	0.322862	0.236392	0.254252	0	0.15231	0.204766	0.176876	0.0209985	0.032994
B cell lineage_CD86	0.480351	B cell lineage	CD86	0.652862	0.00999933	0	0	0	0	0	0.0301952	0	0	0	0	0.100431	0	0	0.410015	0	0	0.0501789	0.0293957	0.0397895	0	0	0.0022	0	0.366895	0	0	0	0
B cell lineage_FoxP3	0.52229	B cell lineage	FoxP3	0.652862	0.357492	0.421049	1.82185	0.954492	1.76686	0.839179	2.43889	1.42817	2.1477	1.2682	1.69595	1.82939	1.4849	2.16264	2.28835	1.87861	1.39281	1.83557	1.08003	1.6874	1.25427	2.34864	1.5597	1.56221	2.22966	1.51155	1.15162	1.40681	1.21468
B cell lineage_Tbet	0.0782101	B cell lineage	Tbet	0.652862	0	0.100033	0.315252	0	0.281276	0.487464	0.144694	0.0887833	0.308675	0.200739	0.461448	0.189464	0.0409885	0.0593651	0.294715	0.41112	0.197611	0.28416	0.494054	0.426547	0.335756	0.841216	0.725625	0.0277963	0.701683	0.001	0.37215	0.00439999	0.0930656
CD4+ T cells_CD25 (IL_2R)	0.483285	CD4+ T cells	CD25 (IL_2R)	0.837158	0	0	0	0.073434	0	0	0.507882	0.0921694	0.0853962	0.299311	0.244555	0.433221	0.00879989	0.409831	0.221192	0.0908749	0.155967	0.12805	0.413882	0.393376	0.422699	0.355749	0.0773229	0.502131	0	0.0569692	0.0625592	0.189563	0.0785193
CD4+ T cells_CD28	0.387037	CD4+ T cells	CD28	0.837158	0.317251	1.01148	0.764212	1.64109	0.617084	1.18653	0.754152	1.55008	1.09089	1.51164	1.46665	1.74312	1.5251	1.35838	1.76314	1.19099	1.77819	1.07906	1.79859	1.66349	1.78114	1.73928	1.58454	1.39427	0.844122	1.71905	1.4448	1.59015	1.06139
CD4+ T cells_CD31/PECAM_1	0.142066	CD4+ T cells	CD31/PECAM_1	0.837158	0	0.064156	0.0617607	0.0862929	0.0317946	0.0737332	0.103714	0.202905	0.160806	0.178451	0.0854958	0.208584	0.27839	0.101028	0.298163	0.0673491	0.274635	0.0821077	0.363352	0.033094	0.0467829	0.0840012	0.139547	0.0579675	0.284353	0.231915	0.236198	0.346523	0.34624
CD4+ T cells_CD45RA	0.158436	CD4+ T cells	CD45RA	0.837158	0	0.202219	0.817908	0.276465	0.50346	0.377192	1.21052	0.298737	0.41563	0.47781	0.453676	0.433312	0.420865	0.323527	0.561092	0.345297	0.52767	0.483357	0.47548	0.250667	0.256769	0.34492	0.408725	0.206626	0.484965	0.337364	0.368971	3.31802	0.551427
CD4+ T cells_CD45RO	0.878675	CD4+ T cells	CD45RO	0.958554	2.89976	3.07664	2.08212	3.46547	2.84834	2.91691	2.05439	3.56169	3.26393	3.53942	3.40221	3.20681	3.48607	2.99715	3.21854	3.57254	3.24514	3.17411	3.7883	3.45846	3.16657	3.55875	3.5975	2.9867	3.65805	3.17208	3.119	2.43554	3.2414
CD4+ T cells_CD49d	0.666218	CD4+ T cells	CD49d	0.837158	0.370092	0.79047	1.9467	1.69282	1.82028	1.36616	1.85465	1.78556	1.12225	1.8448	2.00444	2.07653	1.56244	1.59121	1.54487	1.3829	2.13752	1.84246	2.35183	1.78699	1.67183	1.7103	2.05963	1.51918	1.72756	1.33509	2.23586	1.23994	1.76354
CD4+ T cells_CD54	0.697632	CD4+ T cells	CD54	0.837158	0.00539997	0.210052	0.171163	0.0633576	0.113158	0.003	0.018299	0.0550722	0.144497	0.111171	0.0948577	0.121997	0.192214	0	0.321246	0.131223	0.275405	0.0862929	0.283392	0.0428868	0.0719379	0.047582	0.0833036	0	0.514235	0.00759993	0.118125	0.045784	0.221973
CD4+ T cells_CD69	0.613904	CD4+ T cells	CD69	0.837158	3.04327	3.38906	2.26958	2.4656	0.848614	0.43459	3.19888	2.06202	3.22523	1.83856	1.10929	1.92118	3.15237	3.15348	2.11517	2.40988	2.51741	2.52528	2.03356	0.889904	2.77278	2.77839	1.80226	2.08371	3.19928	2.22125	2.30717	2.1183	2.36956
CD4+ T cells_FoxP3	0.627523	CD4+ T cells	FoxP3	0.837158	0.113754	0.00379999	0.729385	0.246399	0.476556	0.259865	0.481301	0.509119	0.348785	0.684485	0.793026	0.767957	0.417927	0.758076	1.09829	0.825571	0.361664	0.436961	0.384273	0.731653	0.435046	1.4548	0.810501	0.431851	0.737347	0.522499	0.474942	0.355843	0.231331
CD4+ T cells_Gata3	0.486764	CD4+ T cells	Gata3	0.837158	0	0.108586	0.537014	0.158634	0.258318	0.00759993	0.086791	0.643385	0.668325	0.509472	0.460365	0.576954	0.374019	0.518459	0.234446	0.395786	0.573878	0.382225	1.0221	0.660758	0.327608	0.814653	0.889552	0.320295	0.1062	0.419764	0.561092	0.226264	0.262379
CD4+ T cells_PD1	0.995075	CD4+ T cells	PD1	0.995075	1.33163	1.12348	1.02745	1.73901	0.264891	0.327703	2.06762	1.39781	2.51605	1.52294	1.08575	1.5896	2.87683	1.41831	1.65101	2.56349	1.79452	2.23577	1.35751	0.923445	2.10406	1.6636	1.40866	1.01168	2.5923	0.723427	1.51407	0.854679	1.88652
CD4+ T cells_Tbet	0.601405	CD4+ T cells	Tbet	0.837158	0.57832	0.76513	2.00243	0.520392	1.46989	0.281469	1.29536	1.07821	1.14285	0.906602	0.844993	0.645031	0.634716	0.398193	0.901035	1.15747	1.03283	1.33105	1.21238	0.54154	0.253671	1.01847	1.5434	0.379709	1.32302	0.706692	0.942115	0.369345	1.09769
CD8+ T cells_CD28	0.580096	CD8+ T cells	CD28	0.758069	0.142121	0.35791	0.216016	0.361852	0.1062	0	0.586239	0.233668	0.481212	0.378871	0.666375	0.3596	1.26713	0.535358	1.05668	0.337837	1.30512	0.460726	0.450596	0.231331	0.968653	0.727584	0.661003	0.598942	0.454219	0.320105	0.699216	0.792876	0.111767
CD8+ T cells_CD31/PECAM_1	0.200307	CD8+ T cells	CD31/PECAM_1	0.758069	0.0902773	0.165444	0.318108	0.272225	0.430481	0.103217	0.23396	0.624341	0.55592	0.394303	0.692667	0.606691	0.683037	0.513442	0.655368	0.139844	0.828655	0.530556	0.976197	0.65684	0.500802	0.70272	0.725782	0.393376	0.50523	0.402448	0.660187	0.771542	0.354903
CD8+ T cells_CD45RA	0.354292	CD8+ T cells	CD45RA	0.758069	0.0158993	0.305429	2.15525	0.442243	1.61905	2.33796	0.675615	0.470363	0.454219	0.526006	0.552378	0.755615	0.451865	0.574818	0.763675	0.407065	0.649879	0.673189	0.746662	0.324856	0.381107	0.302658	0.462531	0.630241	0.905629	0.535271	0.617753	3.6208	1.78634
CD8+ T cells_CD45RO	0.747502	CD8+ T cells	CD45RO	0.758069	1.94032	2.28919	0.526444	2.77043	1.08738	0.29414	2.24086	2.76495	2.90268	3.01576	3.18273	2.16114	3.33849	1.50945	2.32369	2.84451	3.07962	2.20887	3.04695	3.56005	2.94138	3.7113	3.13715	1.8922	2.41294	1.97071	1.68797	1.50048	1.12642
CD8+ T cells_CD49d	0.639678	CD8+ T cells	CD49d	0.758069	0.422516	0.828215	1.6655	1.49588	1.44783	1.75753	1.56544	1.48529	1.19742	1.58123	1.81518	1.71495	1.50877	1.19941	1.49464	1.46472	1.88531	1.46297	1.95262	1.46297	1.33882	1.58383	1.8086	1.30031	1.71089	1.39052	2.20891	1.00375	1.77533
CD8+ T cells_CD54	0.565252	CD8+ T cells	CD54	0.758069	0.0911736	0.254252	0.285698	0.080513	0.243972	0.0337936	0.0528754	0.181502	0.209465	0.309629	0.184944	0.265761	0.28781	0	0.405127	0.199376	0.371309	0.107195	0.815542	0.297588	0.099038	0.116437	0.226264	0	0.578234	0.0938621	0.19614	0.103416	0.514058
CD8+ T cells_CD69	0.206035	CD8+ T cells	CD69	0.758069	3.19102	3.50306	2.68865	2.65504	1.29823	0.421232	3.51484	3.52181	3.38824	3.70966	3.55598	3.22011	3.61404	3.68511	2.47102	2.93147	3.15825	3.56914	4.08443	3.48408	3.53023	4.04957	3.84073	4.0003	3.52331	3.02835	3.17439	3.81004	3.32041
CD8+ T cells_PD1	0.758069	CD8+ T cells	PD1	0.758069	1.52817	1.16363	0.834072	1.72197	0.370374	0.0607626	3.07111	1.22753	2.67649	2.12671	2.63158	2.36085	2.95906	2.22875	1.85227	2.6665	1.83759	2.47687	2.57151	2.1719	2.3571	2.80443	2.23873	1.79089	1.81191	2.3115	1.77658	1.91312	0.778838
CD8+ T cells_Tbet	0.752319	CD8+ T cells	Tbet	0.758069	0.949674	0.796777	2.26858	0.70272	1.67158	1.45015	1.18261	1.73213	1.32481	1.43204	1.31378	1.23571	0.821007	0.593109	1.06558	1.52776	1.14903	1.36367	1.99583	1.38101	0.787909	1.18395	2.07324	0.653486	1.32996	1.29727	1.39529	0.770475	1.48438
Granulocytes_CD31/PECAM_1	0.15425	Granulocytes	CD31/PECAM_1	0.617	0.51714	0.490049	0.842379	0.72782	0.570025	0.471172	0.806487	1.36261	0.858995	1.02096	0.710971	1.22932	1.05935	0.735945	1.30901	0.57977	1.49929	0.921522	1.54572	1.27036	0.838159	0.927486	1.46534	0.610721	0.971305	1.1256	1.05432	1.07479	0.816429
Granulocytes_CD49d	0.647434	Granulocytes	CD49d	0.871474	0.605513	1.08653	1.29788	1.12378	1.16784	2.81241	2.57414	1.04797	0.741079	1.99193	0.982385	1.46871	1.10344	1.27716	1.28263	1.65138	1.46626	1.2588	1.36554	0.98061	0.908476	0.952766	1.16659	0.812727	1.02198	1.24309	1.20745	1.15644	1.49554
Granulocytes_CD54	0.786286	Granulocytes	CD54	0.871474	0.203297	1.40186	0.669137	1.13186	0.56092	0.508942	0.36035	1.03894	0.573792	0.866589	0.43933	1.14476	0.743873	0.405219	0.930971	0.397823	1.28751	0.390221	1.16162	0.587853	0.587598	0.404757	0.6319	0.533962	1.24335	0.910485	0.841943	0.663447	0.736724
Granulocytes_CD86	0.871474	Granulocytes	CD86	0.871474	0.33462	0.312871	0.135188	0.452227	0.753074	0.559714	0.269235	0.614575	0.495121	0.567624	0.620591	0.796777	0.545535	0.414342	1.19853	0.259478	1.19554	0.446968	0.818055	0.354338	0.386877	0.190054	0.633888	0.267402	1.33853	0.626919	0.752534	0.696344	0.618254
Monocytes_CD25 (IL_2R)	0.652612	Monocytes	CD25 (IL_2R)	0.761381	1.40993	0.562469	2.65463	2.42358	1.21903	0.080812	2.69585	2.44546	0.706533	1.48326	2.16275	0.980075	0.674969	1.49169	2.31667	1.12331	1.5962	0.872578	2.90496	3.68312	2.79923	1.69353	3.04975	0.737502	0.0847983	0.425174	2.07883	0.786401	1.69375
Monocytes_CD31/PECAM_1	0.548158	Monocytes	CD31/PECAM_1	0.761381	1.09949	1.03226	0.908454	0.991156	1.79316	0.849844	1.09396	0.908684	2.4709	1.52202	2.18578	2.41338	1.91552	1.60087	1.05618	1.44547	2.00017	2.64497	0.507086	0.351516	0.381107	2.02959	0.487018	2.18196	1.8854	2.44996	1.36932	2.57243	2.44797
Monocytes_CD36	0.573363	Monocytes	CD36	0.761381	2.86814	2.72042	1.39194	1.20405	3.54283	3.1893	1.87923	0.371028	3.75456	2.9826	3.25379	3.45764	2.53194	0.304856	1.07991	2.39302	3.5089	3.63378	0	0	0.121699	3.08258	0	3.05776	3.42782	3.82563	2.46445	3.56647	3.06746
Monocytes_CD45RA	0.0114084	Monocytes	CD45RA	0.0798585	1.13116	0.676747	2.09927	2.00359	1.34176	0.630158	2.20356	1.90869	1.50709	1.49647	1.96786	1.77638	1.76773	1.49023	1.98343	1.20537	1.6074	1.37332	2.11172	2.86813	2.01272	1.79536	2.27085	1.10822	0.771466	0.83845	1.6663	3.31837	2.28557
Monocytes_CD49d	0.588367	Monocytes	CD49d	0.761381	3.12033	2.70565	3.60196	3.84931	2.52216	1.60149	3.42894	3.52435	2.01902	2.69664	3.60895	2.80055	2.26864	3.29774	3.30405	2.58184	2.9336	2.63042	3.40308	4.32908	3.64752	3.37167	3.66992	2.92792	2.3048	2.29705	3.19143	2.59589	3.22471
Monocytes_CD54	0.820139	Monocytes	CD54	0.820139	1.03863	3.44073	0.871901	1.09697	1.82701	0.902429	0.497253	0.804102	2.32468	0.912423	1.50048	1.8119	2.14401	0.652667	1.00065	1.03542	1.82642	1.41257	0.195649	0.174316	0.339255	0.960399	0.191134	1.48851	2.59653	1.57696	0.647744	1.85346	1.44023
Monocytes_CD86	0.127485	Monocytes	CD86	0.446197	0.121501	0.383714	0.36869	0.199867	0.403187	0.383063	0.0543732	0.335472	1.13682	0.353022	0.53684	0.839397	0.166036	0.464514	0.417376	0.152903	0.535794	0.798948	0	0	0.0493799	0.781262	0	0.794527	0.843469	1.31453	0.299694	0.45874	0.368035
Myeloid_CD25 (IL_2R)	0.899761	Myeloid	CD25 (IL_2R)	0.899761	1.55873	2.11024	2.57282	1.78111	2.51856	0.737502	1.71815	2.56914	2.02794	2.97044	2.86896	1.87616	2.09888	1.14725	3.52511	2.8868	2.77724	3.0173	3.25558	3.66048	3.3145	2.66896	3.52181	1.38526	0.554884	1.19026	3.13829	1.8606	1.61412
Myeloid_CD31/PECAM_1	0.248289	Myeloid	CD31/PECAM_1	0.886946	0.525305	1.25638	1.69126	1.23914	1.55405	0.82513	1.27041	2.41009	1.81971	1.55365	1.94188	1.90776	1.49306	1.71453	1.81895	0.915601	1.98291	2.14627	2.63791	2.06049	1.18283	1.96126	2.52805	1.38968	1.65982	1.63024	2.02397	1.80258	1.67697
Myeloid_CD36	0.648278	Myeloid	CD36	0.899761	0	0	0.124081	0.0790177	0.343222	0.178058	0.0595648	0.114351	0.246302	0.136377	0.138358	0.261993	0.180616	0.0018	0.624757	0.0469827	0.485055	0.308102	0.349445	0.238726	0.0419877	0.121501	0.251248	0.0133996	0.734541	0.0958532	0.348503	0.246884	0.285121
Myeloid_CD49d	0.877343	Myeloid	CD49d	0.899761	3.74161	3.85151	3.88252	3.92181	4.15993	2.74069	3.2402	4.34024	3.67462	4.5684	3.93069	3.58823	3.64267	2.79788	4.64521	4.13765	4.11005	4.28759	4.79437	4.62531	4.48323	4.23399	4.51008	3.75452	3.0993	3.66674	4.49172	3.8812	3.8095
Myeloid_CD54	0.729016	Myeloid	CD54	0.899761	1.14326	1.93474	1.9865	1.68274	2.03235	1.308	1.87915	1.69638	2.44553	1.32222	1.86841	2.01738	2.45785	0.610889	2.59316	2.21017	2.49568	1.957	2.69065	1.93553	1.54601	1.28345	2.2129	1.2937	3.53737	1.40464	1.91385	2.63691	2.41415
Myeloid_CD69	0.122894	Myeloid	CD69	0.886946	0.0494798	0.848108	0.324476	0.718393	0.253477	0.0659522	0.162484	1.7475	0.906741	1.32946	0.724056	0.956254	0.512384	1.26572	0.272418	0.196336	0.448783	0.74821	1.93273	0.632894	0.3402	0.927828	0.824395	1.42597	0.470812	0.851433	0.955383	1.01482	1.32391
Myeloid_CD86	0.452456	Myeloid	CD86	0.899761	0.113556	0.414986	0.582156	0.380828	0.582922	0.285505	0.588447	0.782322	1.06293	0.741079	0.618421	0.93832	0.748364	0.405773	1.12313	0.761454	0.970112	0.883352	1.05817	0.581474	0.382504	0.684806	0.712474	0.44106	1.69036	0.850783	0.545709	0.571909	0.531954
Myeloid_PDL1	0.332605	Myeloid	PDL1	0.886946	0	0.137368	0.114351	0.0828053	0.164458	0.0902773	0.129042	0.14608	0.203982	0.143111	0.121699	0.27049	0.152409	0.0327941	0.484251	0.175695	0.24339	0.162681	0.339255	0.117529	0.0670498	0.107791	0.118324	0.0165992	0.797077	0.188286	0.166431	0.173725	0.163668
NK cells_CD25 (IL_2R)	0.948723	NK cells	CD25 (IL_2R)	0.948723	0.217872	0	0	0.196532	0	0	0.683825	1.02706	0.108487	0.0959527	0.0771235	0.0689454	0	0.515907	1.32833	0	0.217482	0.0635572	0.444425	0.0771235	0.188089	0.0441856	0.0275965	0.629826	0	0.154781	0.0246975	0	0.0451846
NK cells_CD31/PECAM_1	0.41525	NK cells	CD31/PECAM_1	0.79853	0.00459998	0.00869989	0.0740323	0.152014	0.0689454	0.0737332	0.173724	0.435776	0.157251	0.211324	0.119912	0.28243	0.205941	0.0748301	0.435138	0.0809117	0.229773	0.120905	0.5337	0.173922	0.0323943	0.180813	0.249697	0.0476819	0.269332	0.30218	0.222461	0.20692	0.227532
NK cells_CD45RA	0.356096	NK cells	CD45RA	0.79853	1.10535	2.50658	2.69271	2.10538	3.45921	2.921	1.4656	1.64221	3.18286	2.82913	3.11247	2.53182	2.1977	1.86336	2.23829	2.5518	2.33968	2.62397	2.16585	2.76002	2.22425	2.53112	3.02183	2.23372	2.96929	1.6319	2.6841	3.29443	3.51305
NK cells_CD45RO	0.443628	NK cells	CD45RO	0.79853	0	0.0189989	0.131025	0.0771235	0.0553717	0.0579675	0.21367	0.435776	0.221094	0.251345	0.17274	0.379057	0.310583	0.167417	0.611559	0.12299	0.367099	0.252024	0.491741	0.152805	0.0807123	0.165444	0.212986	0.135881	0.322196	0.414986	0.129637	0.150135	0.24407
NK cells_CD49d	0.414634	NK cells	CD49d	0.79853	1.43113	0.888216	1.5698	1.52933	1.27897	1.04822	2.0869	2.28975	1.71794	2.03598	1.91003	1.94597	1.74519	1.78807	2.72222	1.68793	2.06149	1.7603	1.86297	1.54438	1.68546	1.87992	1.88457	2.14142	1.91413	1.48378	1.81731	1.43767	1.91909
NK cells_CD54	0.123292	NK cells	CD54	0.79853	0.229383	0.998702	0.451865	0.805742	0.278294	0.215527	0.331685	0.823438	0.480854	0.379337	0.606019	0.786401	1.07222	0.361383	1.20487	0.534486	1.06731	0.630158	1.20046	0.676747	0.830268	0.463432	0.679975	0.540844	0.623924	0.388735	0.517931	0.664017	0.67933
NK cells_CD69	0.865333	NK cells	CD69	0.948723	0.186124	3.52942	0.848325	2.90746	0.380828	0.380362	0.0712387	0.0833036	2.51248	0.632314	0.70065	1.64232	3.27344	3.24352	0.28368	2.84913	2.60134	3.01465	3.12765	0.975272	1.90282	2.24583	1.80933	3.31495	2.62675	2.08663	0.882151	3.27604	0.439148
NK cells_PDL1	0.780651	NK cells	PDL1	0.948723	0	0.057668	0.0488805	0.003	0.136179	0.00339999	0.120806	0.281661	0.258221	0.190839	0.0844994	0.235614	0.0785193	0.135881	0.677797	0.0401892	0.0920699	0.141725	0.247272	0.0481814	0.0271966	0.0817091	0.100033	0.214159	0.580622	0.0769241	0.0893809	0.0647547	0.137962
NK cells_Tbet	0.935549	NK cells	Tbet	0.948723	0.183764	1.50133	2.87295	1.03617	2.90906	1.42551	0.230161	0.205256	3.03926	2.62712	2.76472	1.56636	1.15289	0.475749	0.423341	1.60732	1.39221	1.37864	1.94771	2.12171	1.05183	2.10225	3.16928	0.487374	2.34171	1.32669	2.26248	1.46125	2.06987
Undefined_CD25 (IL_2R)	0.0260152	Undefined	CD25 (IL_2R)	0.0880795	5.41866	3.64721	0.763906	3.8857	3.82419	4.22298	4.16941	1.24066	3.58149	3.93073	3.82153	3.69218	3.81929	3.59199	3.60402	3.65144	3.60733	3.97222	3.74055	3.53196	0.356782	3.86554	3.71091	4.0827	1.73682	3.66778	3.49994	4.14213	3.75988
Undefined_CD28	0.0490765	Undefined	CD28	0.0956483	0	0	0.832171	0.0673057	0	0	0	1.417	0.623327	0.0101998	0.141131	0.136773	0	0	0.00579997	0	0.0384644	0	0.0365918	0.707562	1.69382	0	0.195748	0.261412	2.3324	0.0763259	0	0.0422848	0.130232
Undefined_CD31/PECAM_1	0.385326	Undefined	CD31/PECAM_1	0.462391	0	0.00519998	0.366163	0.193972	0.126937	0.00519997	0.190053	1.39291	0.742216	0.600538	0.578234	0.350951	0.280699	0	0.564705	0.318583	0.760833	0.132809	0.701128	0.490346	0.512472	0.463973	0.889974	0	2.17278	0.205158	0.41123	0.412798	0.339822
Undefined_CD36	0.621855	Undefined	CD36	0.678388	0	0	0	0.0763283	0.0130994	0.0678455	0	0.0692781	0.224408	0.378181	0.0559708	0.463432	0	0.690265	0.396342	0	0.0004	0.0609622	0	0	0	0.383521	0	0	0.317251	0	0.352782	0.207887	0.101625
Undefined_CD45RA	0.0052899	Undefined	CD45RA	0.0384722	5.00502	2.95682	0.67707	3.09201	2.8308	3.42983	3.42012	1.35602	2.22174	3.13625	3.3058	3.07577	3.14406	2.50983	2.62724	2.46732	2.98408	3.0797	2.98877	2.67161	0.159523	2.83174	3.16267	3.26104	0.810353	2.72065	2.98001	3.40811	3.14289
Undefined_CD45RO	0.0293598	Undefined	CD45RO	0.0880795	1.326	1.03592	2.97975	1.42582	1.62422	0.587145	1.00504	3.26014	2.4088	1.1892	1.37684	1.21293	1.13996	0.545535	1.6743	2.26318	1.03815	1.31142	1.41977	1.85624	3.30364	1.04757	1.63453	1.36463	3.95773	1.28253	1.04945	1.0836	1.32112
Undefined_CD49d	0.00641204	Undefined	CD49d	0.0384722	6.30423	4.28894	1.11451	4.21214	3.87476	4.56772	4.58848	1.67986	3.55115	4.37903	3.90468	4.17065	4.26643	3.87049	3.9419	3.08295	4.11135	3.77412	4.17416	4.22855	0.699535	4.05881	4.39645	4.43464	1.56396	3.99931	4.185	4.4702	4.16808
Undefined_CD54	0.0962081	Undefined	CD54	0.144312	0.997794	0	0.618087	0.230051	0.141912	0	0	1.01559	0.606376	0	0.240087	0.115543	0	0	0.204374	0.144497	0.381486	0	0.186124	0.296715	0.63984	0.0519283	0.484072	0.0131996	1.25311	0.0453844	0.166317	0	0.070342
Undefined_CD86	0.0557948	Undefined	CD86	0.0956483	0	0	0.0946586	0.392693	0.0774207	0	0	2.44089	0.102579	0.0950564	0.442425	0	0.0579675	0	0.331306	0.311917	0	0	0.365788	0.41271	2.26326	0	0.288386	0	3.16471	0.121104	0.0930457	0	0.0617607
Undefined_FoxP3	0.808435	Undefined	FoxP3	0.808435	0.698419	0	0.0445852	0.0257902	0	0	0.0992368	0.536608	0.0177962	0	0.308102	0	0.0157993	0	0	0	0	0	0	0.0268963	0.122096	0	0.130628	0	0.18219	0	0	0	0
Undefined_Gata3	0.257312	Undefined	Gata3	0.343083	0.165247	0	0.112562	0	0	0	0	0.278793	0.0910568	0	0	0	0.0481814	0	0	0	0	0	0.494232	0.0290957	0.114748	0	0.136377	0	0.468115	0	0.13521	0	0
Undefined_PDL1	0.0374102	Undefined	PDL1	0.0897846	0.93138	0.0623596	2.30155	0.00689978	0	0	0	3.38458	0.145287	0	0.0493799	0	0	0	0.144101	0	0	0	0	0.294494	3.29561	0	0.139547	0	4.15124	0	0.0117997	0.0438823	0.00479998
CP general populations; ADvsMS	p_val	cluster_id	marker_id	p_adj	ad07	ms07	control09	ms03	ms01	control10	ms02	ms11	control04	ad03	ms09	ad01	ad05	ad06	ms06	control03	ms08	control07	ms10	ms05	control05	control02	ad02	ms04	control08	control01	control06	ad08	ad04
B cell lineage_CD25 (IL_2R)	0.72893	B cell lineage	CD25 (IL_2R)	0.866344	3.42918	0.343033	0.294619	0.615997	0.157152	0.0689454	0.511322	0.0514772	0.913391	0.592487	0.297014	0.169586	0.394118	0.590213	0.288194	0.296822	0.250762	0.436779	0.409186	0.328272	0.279449	0.344731	0.182781	0.526294	0.165244	0.137566	0.320486	0.293565	0.356406
B cell lineage_CD31/PECAM_1	0.143236	B cell lineage	CD31/PECAM_1	0.477454	0.283223	0.141527	0.139448	0.16574	0.212399	0.0647547	0.308881	0.287408	0.280507	0.22168	0.389664	0.363914	0.256188	0.195257	0.861866	0.194177	0.407894	0.224899	0.571652	0.457294	0.210345	0.176679	0.3332	0.119116	0.24067	0.402448	0.371776	0.382597	0.546576
B cell lineage_CD45RA	0.816343	B cell lineage	CD45RA	0.866344	3.29312	4.10499	3.52871	4.02397	4.04953	3.99947	3.65393	4.27494	3.03726	4.06349	3.88326	3.86987	3.77658	3.78452	3.58487	3.93714	3.96131	3.96132	4.64353	4.02378	4.18054	3.78353	4.50604	3.92031	4.13225	4.03557	3.97467	4.49569	3.97894
B cell lineage_CD45RO	0.132809	B cell lineage	CD45RO	0.477454	0.0306807	0.0083999	0.113854	0.0593651	0.0874884	0	0.0158988	0.146179	0.211421	0.0725364	0.240476	0.368222	0.195748	0.0208985	0.694587	0.0970476	0.306002	0.262186	0.296535	0.15656	0.0425871	0.109581	0.0271966	0	0.322058	0.0771235	0.180223	0.0263969	0.186517
B cell lineage_CD49d	0.283595	B cell lineage	CD49d	0.542657	4.60122	2.0056	2.17548	2.40571	1.56676	1.81121	2.25649	2.27471	2.41106	2.22427	2.19814	2.25827	2.15395	2.02324	2.90898	1.77704	2.33434	2.64911	2.49831	2.72693	1.78582	2.14736	2.54765	2.05821	2.17679	1.63693	2.53409	1.83027	2.15797
B cell lineage_CD54	0.00891588	B cell lineage	CD54	0.0891588	0.377908	0.567452	0.448964	0.375532	0.655123	0.390035	0.577954	0.595693	0.345486	0.483622	0.626254	0.499028	0.473686	0.075229	1.30386	0.662958	0.92001	0.834072	0.727233	1.03264	0.363539	0.455848	0.482285	0.253943	1.25911	0.586579	0.424716	0.3839	0.676909
B cell lineage_CD69	0.315946	B cell lineage	CD69	0.542657	0	0.27049	0.0891817	0.0505782	0.15972	0	0	0.134186	0.127851	0	0.247466	0.308866	0.227044	0.434862	0.228214	0.565564	0.0555714	0	0.564615	0.523376	0.322862	0.236392	0.254252	0	0.15231	0.204766	0.176876	0.0209985	0.032994
B cell lineage_CD86	0.325594	B cell lineage	CD86	0.542657	0.00999933	0	0	0	0	0	0.0301952	0	0	0	0	0.100431	0	0	0.410015	0	0	0.0501789	0.0293957	0.0397895	0	0	0.0022	0	0.366895	0	0	0	0
B cell lineage_FoxP3	0.866344	B cell lineage	FoxP3	0.866344	0.357492	0.421049	1.82185	0.954492	1.76686	0.839179	2.43889	1.42817	2.1477	1.2682	1.69595	1.82939	1.4849	2.16264	2.28835	1.87861	1.39281	1.83557	1.08003	1.6874	1.25427	2.34864	1.5597	1.56221	2.22966	1.51155	1.15162	1.40681	1.21468
B cell lineage_Tbet	0.465805	B cell lineage	Tbet	0.665436	0	0.100033	0.315252	0	0.281276	0.487464	0.144694	0.0887833	0.308675	0.200739	0.461448	0.189464	0.0409885	0.0593651	0.294715	0.41112	0.197611	0.28416	0.494054	0.426547	0.335756	0.841216	0.725625	0.0277963	0.701683	0.001	0.37215	0.00439999	0.0930656
CD4+ T cells_CD25 (IL_2R)	0.345354	CD4+ T cells	CD25 (IL_2R)	0.766101	0	0	0	0.073434	0	0	0.507882	0.0921694	0.0853962	0.299311	0.244555	0.433221	0.00879989	0.409831	0.221192	0.0908749	0.155967	0.12805	0.413882	0.393376	0.422699	0.355749	0.0773229	0.502131	0	0.0569692	0.0625592	0.189563	0.0785193
CD4+ T cells_CD28	0.705903	CD4+ T cells	CD28	0.930448	0.317251	1.01148	0.764212	1.64109	0.617084	1.18653	0.754152	1.55008	1.09089	1.51164	1.46665	1.74312	1.5251	1.35838	1.76314	1.19099	1.77819	1.07906	1.79859	1.66349	1.78114	1.73928	1.58454	1.39427	0.844122	1.71905	1.4448	1.59015	1.06139
CD4+ T cells_CD31/PECAM_1	0.378732	CD4+ T cells	CD31/PECAM_1	0.766101	0	0.064156	0.0617607	0.0862929	0.0317946	0.0737332	0.103714	0.202905	0.160806	0.178451	0.0854958	0.208584	0.27839	0.101028	0.298163	0.0673491	0.274635	0.0821077	0.363352	0.033094	0.0467829	0.0840012	0.139547	0.0579675	0.284353	0.231915	0.236198	0.346523	0.34624
CD4+ T cells_CD45RA	0.217548	CD4+ T cells	CD45RA	0.766101	0	0.202219	0.817908	0.276465	0.50346	0.377192	1.21052	0.298737	0.41563	0.47781	0.453676	0.433312	0.420865	0.323527	0.561092	0.345297	0.52767	0.483357	0.47548	0.250667	0.256769	0.34492	0.408725	0.206626	0.484965	0.337364	0.368971	3.31802	0.551427
CD4+ T cells_CD45RO	0.789636	CD4+ T cells	CD45RO	0.930448	2.89976	3.07664	2.08212	3.46547	2.84834	2.91691	2.05439	3.56169	3.26393	3.53942	3.40221	3.20681	3.48607	2.99715	3.21854	3.57254	3.24514	3.17411	3.7883	3.45846	3.16657	3.55875	3.5975	2.9867	3.65805	3.17208	3.119	2.43554	3.2414
CD4+ T cells_CD49d	0.563037	CD4+ T cells	CD49d	0.930448	0.370092	0.79047	1.9467	1.69282	1.82028	1.36616	1.85465	1.78556	1.12225	1.8448	2.00444	2.07653	1.56244	1.59121	1.54487	1.3829	2.13752	1.84246	2.35183	1.78699	1.67183	1.7103	2.05963	1.51918	1.72756	1.33509	2.23586	1.23994	1.76354
CD4+ T cells_CD54	0.38305	CD4+ T cells	CD54	0.766101	0.00539997	0.210052	0.171163	0.0633576	0.113158	0.003	0.018299	0.0550722	0.144497	0.111171	0.0948577	0.121997	0.192214	0	0.321246	0.131223	0.275405	0.0862929	0.283392	0.0428868	0.0719379	0.047582	0.0833036	0	0.514235	0.00759993	0.118125	0.045784	0.221973
CD4+ T cells_CD69	0.211046	CD4+ T cells	CD69	0.766101	3.04327	3.38906	2.26958	2.4656	0.848614	0.43459	3.19888	2.06202	3.22523	1.83856	1.10929	1.92118	3.15237	3.15348	2.11517	2.40988	2.51741	2.52528	2.03356	0.889904	2.77278	2.77839	1.80226	2.08371	3.19928	2.22125	2.30717	2.1183	2.36956
CD4+ T cells_FoxP3	0.930448	CD4+ T cells	FoxP3	0.930448	0.113754	0.00379999	0.729385	0.246399	0.476556	0.259865	0.481301	0.509119	0.348785	0.684485	0.793026	0.767957	0.417927	0.758076	1.09829	0.825571	0.361664	0.436961	0.384273	0.731653	0.435046	1.4548	0.810501	0.431851	0.737347	0.522499	0.474942	0.355843	0.231331
CD4+ T cells_Gata3	0.878748	CD4+ T cells	Gata3	0.930448	0	0.108586	0.537014	0.158634	0.258318	0.00759993	0.086791	0.643385	0.668325	0.509472	0.460365	0.576954	0.374019	0.518459	0.234446	0.395786	0.573878	0.382225	1.0221	0.660758	0.327608	0.814653	0.889552	0.320295	0.1062	0.419764	0.561092	0.226264	0.262379
CD4+ T cells_PD1	0.17146	CD4+ T cells	PD1	0.766101	1.33163	1.12348	1.02745	1.73901	0.264891	0.327703	2.06762	1.39781	2.51605	1.52294	1.08575	1.5896	2.87683	1.41831	1.65101	2.56349	1.79452	2.23577	1.35751	0.923445	2.10406	1.6636	1.40866	1.01168	2.5923	0.723427	1.51407	0.854679	1.88652
CD4+ T cells_Tbet	0.703235	CD4+ T cells	Tbet	0.930448	0.57832	0.76513	2.00243	0.520392	1.46989	0.281469	1.29536	1.07821	1.14285	0.906602	0.844993	0.645031	0.634716	0.398193	0.901035	1.15747	1.03283	1.33105	1.21238	0.54154	0.253671	1.01847	1.5434	0.379709	1.32302	0.706692	0.942115	0.369345	1.09769
CD8+ T cells_CD28	0.909497	CD8+ T cells	CD28	0.909497	0.142121	0.35791	0.216016	0.361852	0.1062	0	0.586239	0.233668	0.481212	0.378871	0.666375	0.3596	1.26713	0.535358	1.05668	0.337837	1.30512	0.460726	0.450596	0.231331	0.968653	0.727584	0.661003	0.598942	0.454219	0.320105	0.699216	0.792876	0.111767
CD8+ T cells_CD31/PECAM_1	0.513016	CD8+ T cells	CD31/PECAM_1	0.830663	0.0902773	0.165444	0.318108	0.272225	0.430481	0.103217	0.23396	0.624341	0.55592	0.394303	0.692667	0.606691	0.683037	0.513442	0.655368	0.139844	0.828655	0.530556	0.976197	0.65684	0.500802	0.70272	0.725782	0.393376	0.50523	0.402448	0.660187	0.771542	0.354903
CD8+ T cells_CD45RA	0.212093	CD8+ T cells	CD45RA	0.755787	0.0158993	0.305429	2.15525	0.442243	1.61905	2.33796	0.675615	0.470363	0.454219	0.526006	0.552378	0.755615	0.451865	0.574818	0.763675	0.407065	0.649879	0.673189	0.746662	0.324856	0.381107	0.302658	0.462531	0.630241	0.905629	0.535271	0.617753	3.6208	1.78634
CD8+ T cells_CD45RO	0.335905	CD8+ T cells	CD45RO	0.755787	1.94032	2.28919	0.526444	2.77043	1.08738	0.29414	2.24086	2.76495	2.90268	3.01576	3.18273	2.16114	3.33849	1.50945	2.32369	2.84451	3.07962	2.20887	3.04695	3.56005	2.94138	3.7113	3.13715	1.8922	2.41294	1.97071	1.68797	1.50048	1.12642
CD8+ T cells_CD49d	0.717365	CD8+ T cells	CD49d	0.830663	0.422516	0.828215	1.6655	1.49588	1.44783	1.75753	1.56544	1.48529	1.19742	1.58123	1.81518	1.71495	1.50877	1.19941	1.49464	1.46472	1.88531	1.46297	1.95262	1.46297	1.33882	1.58383	1.8086	1.30031	1.71089	1.39052	2.20891	1.00375	1.77533
CD8+ T cells_CD54	0.296714	CD8+ T cells	CD54	0.755787	0.0911736	0.254252	0.285698	0.080513	0.243972	0.0337936	0.0528754	0.181502	0.209465	0.309629	0.184944	0.265761	0.28781	0	0.405127	0.199376	0.371309	0.107195	0.815542	0.297588	0.099038	0.116437	0.226264	0	0.578234	0.0938621	0.19614	0.103416	0.514058
CD8+ T cells_CD69	0.297727	CD8+ T cells	CD69	0.755787	3.19102	3.50306	2.68865	2.65504	1.29823	0.421232	3.51484	3.52181	3.38824	3.70966	3.55598	3.22011	3.61404	3.68511	2.47102	2.93147	3.15825	3.56914	4.08443	3.48408	3.53023	4.04957	3.84073	4.0003	3.52331	3.02835	3.17439	3.81004	3.32041
CD8+ T cells_PD1	0.591898	CD8+ T cells	PD1	0.830663	1.52817	1.16363	0.834072	1.72197	0.370374	0.0607626	3.07111	1.22753	2.67649	2.12671	2.63158	2.36085	2.95906	2.22875	1.85227	2.6665	1.83759	2.47687	2.57151	2.1719	2.3571	2.80443	2.23873	1.79089	1.81191	2.3115	1.77658	1.91312	0.778838
CD8+ T cells_Tbet	0.738367	CD8+ T cells	Tbet	0.830663	0.949674	0.796777	2.26858	0.70272	1.67158	1.45015	1.18261	1.73213	1.32481	1.43204	1.31378	1.23571	0.821007	0.593109	1.06558	1.52776	1.14903	1.36367	1.99583	1.38101	0.787909	1.18395	2.07324	0.653486	1.32996	1.29727	1.39529	0.770475	1.48438
Granulocytes_CD31/PECAM_1	0.633417	Granulocytes	CD31/PECAM_1	0.640853	0.51714	0.490049	0.842379	0.72782	0.570025	0.471172	0.806487	1.36261	0.858995	1.02096	0.710971	1.22932	1.05935	0.735945	1.30901	0.57977	1.49929	0.921522	1.54572	1.27036	0.838159	0.927486	1.46534	0.610721	0.971305	1.1256	1.05432	1.07479	0.816429
Granulocytes_CD49d	0.640853	Granulocytes	CD49d	0.640853	0.605513	1.08653	1.29788	1.12378	1.16784	2.81241	2.57414	1.04797	0.741079	1.99193	0.982385	1.46871	1.10344	1.27716	1.28263	1.65138	1.46626	1.2588	1.36554	0.98061	0.908476	0.952766	1.16659	0.812727	1.02198	1.24309	1.20745	1.15644	1.49554
Granulocytes_CD54	0.338366	Granulocytes	CD54	0.640853	0.203297	1.40186	0.669137	1.13186	0.56092	0.508942	0.36035	1.03894	0.573792	0.866589	0.43933	1.14476	0.743873	0.405219	0.930971	0.397823	1.28751	0.390221	1.16162	0.587853	0.587598	0.404757	0.6319	0.533962	1.24335	0.910485	0.841943	0.663447	0.736724
Granulocytes_CD86	0.414317	Granulocytes	CD86	0.640853	0.33462	0.312871	0.135188	0.452227	0.753074	0.559714	0.269235	0.614575	0.495121	0.567624	0.620591	0.796777	0.545535	0.414342	1.19853	0.259478	1.19554	0.446968	0.818055	0.354338	0.386877	0.190054	0.633888	0.267402	1.33853	0.626919	0.752534	0.696344	0.618254
Monocytes_CD25 (IL_2R)	0.0873725	Monocytes	CD25 (IL_2R)	0.26761	1.40993	0.562469	2.65463	2.42358	1.21903	0.080812	2.69585	2.44546	0.706533	1.48326	2.16275	0.980075	0.674969	1.49169	2.31667	1.12331	1.5962	0.872578	2.90496	3.68312	2.79923	1.69353	3.04975	0.737502	0.0847983	0.425174	2.07883	0.786401	1.69375
Monocytes_CD31/PECAM_1	0.0825462	Monocytes	CD31/PECAM_1	0.26761	1.09949	1.03226	0.908454	0.991156	1.79316	0.849844	1.09396	0.908684	2.4709	1.52202	2.18578	2.41338	1.91552	1.60087	1.05618	1.44547	2.00017	2.64497	0.507086	0.351516	0.381107	2.02959	0.487018	2.18196	1.8854	2.44996	1.36932	2.57243	2.44797
Monocytes_CD36	0.333021	Monocytes	CD36	0.582787	2.86814	2.72042	1.39194	1.20405	3.54283	3.1893	1.87923	0.371028	3.75456	2.9826	3.25379	3.45764	2.53194	0.304856	1.07991	2.39302	3.5089	3.63378	0	0	0.121699	3.08258	0	3.05776	3.42782	3.82563	2.46445	3.56647	3.06746
Monocytes_CD45RA	0.609664	Monocytes	CD45RA	0.711275	1.13116	0.676747	2.09927	2.00359	1.34176	0.630158	2.20356	1.90869	1.50709	1.49647	1.96786	1.77638	1.76773	1.49023	1.98343	1.20537	1.6074	1.37332	2.11172	2.86813	2.01272	1.79536	2.27085	1.10822	0.771466	0.83845	1.6663	3.31837	2.28557
Monocytes_CD49d	0.11469	Monocytes	CD49d	0.26761	3.12033	2.70565	3.60196	3.84931	2.52216	1.60149	3.42894	3.52435	2.01902	2.69664	3.60895	2.80055	2.26864	3.29774	3.30405	2.58184	2.9336	2.63042	3.40308	4.32908	3.64752	3.37167	3.66992	2.92792	2.3048	2.29705	3.19143	2.59589	3.22471
Monocytes_CD54	0.494229	Monocytes	CD54	0.69192	1.03863	3.44073	0.871901	1.09697	1.82701	0.902429	0.497253	0.804102	2.32468	0.912423	1.50048	1.8119	2.14401	0.652667	1.00065	1.03542	1.82642	1.41257	0.195649	0.174316	0.339255	0.960399	0.191134	1.48851	2.59653	1.57696	0.647744	1.85346	1.44023
Monocytes_CD86	0.739341	Monocytes	CD86	0.739341	0.121501	0.383714	0.36869	0.199867	0.403187	0.383063	0.0543732	0.335472	1.13682	0.353022	0.53684	0.839397	0.166036	0.464514	0.417376	0.152903	0.535794	0.798948	0	0	0.0493799	0.781262	0	0.794527	0.843469	1.31453	0.299694	0.45874	0.368035
Myeloid_CD25 (IL_2R)	0.104028	Myeloid	CD25 (IL_2R)	0.416112	1.55873	2.11024	2.57282	1.78111	2.51856	0.737502	1.71815	2.56914	2.02794	2.97044	2.86896	1.87616	2.09888	1.14725	3.52511	2.8868	2.77724	3.0173	3.25558	3.66048	3.3145	2.66896	3.52181	1.38526	0.554884	1.19026	3.13829	1.8606	1.61412
Myeloid_CD31/PECAM_1	0.589948	Myeloid	CD31/PECAM_1	0.674226	0.525305	1.25638	1.69126	1.23914	1.55405	0.82513	1.27041	2.41009	1.81971	1.55365	1.94188	1.90776	1.49306	1.71453	1.81895	0.915601	1.98291	2.14627	2.63791	2.06049	1.18283	1.96126	2.52805	1.38968	1.65982	1.63024	2.02397	1.80258	1.67697
Myeloid_CD36	0.269852	Myeloid	CD36	0.674226	0	0	0.124081	0.0790177	0.343222	0.178058	0.0595648	0.114351	0.246302	0.136377	0.138358	0.261993	0.180616	0.0018	0.624757	0.0469827	0.485055	0.308102	0.349445	0.238726	0.0419877	0.121501	0.251248	0.0133996	0.734541	0.0958532	0.348503	0.246884	0.285121
Myeloid_CD49d	0.0695265	Myeloid	CD49d	0.416112	3.74161	3.85151	3.88252	3.92181	4.15993	2.74069	3.2402	4.34024	3.67462	4.5684	3.93069	3.58823	3.64267	2.79788	4.64521	4.13765	4.11005	4.28759	4.79437	4.62531	4.48323	4.23399	4.51008	3.75452	3.0993	3.66674	4.49172	3.8812	3.8095
Myeloid_CD54	0.733897	Myeloid	CD54	0.733897	1.14326	1.93474	1.9865	1.68274	2.03235	1.308	1.87915	1.69638	2.44553	1.32222	1.86841	2.01738	2.45785	0.610889	2.59316	2.21017	2.49568	1.957	2.69065	1.93553	1.54601	1.28345	2.2129	1.2937	3.53737	1.40464	1.91385	2.63691	2.41415
Myeloid_CD69	0.566045	Myeloid	CD69	0.674226	0.0494798	0.848108	0.324476	0.718393	0.253477	0.0659522	0.162484	1.7475	0.906741	1.32946	0.724056	0.956254	0.512384	1.26572	0.272418	0.196336	0.448783	0.74821	1.93273	0.632894	0.3402	0.927828	0.824395	1.42597	0.470812	0.851433	0.955383	1.01482	1.32391
Myeloid_CD86	0.487429	Myeloid	CD86	0.674226	0.113556	0.414986	0.582156	0.380828	0.582922	0.285505	0.588447	0.782322	1.06293	0.741079	0.618421	0.93832	0.748364	0.405773	1.12313	0.761454	0.970112	0.883352	1.05817	0.581474	0.382504	0.684806	0.712474	0.44106	1.69036	0.850783	0.545709	0.571909	0.531954
Myeloid_PDL1	0.401708	Myeloid	PDL1	0.674226	0	0.137368	0.114351	0.0828053	0.164458	0.0902773	0.129042	0.14608	0.203982	0.143111	0.121699	0.27049	0.152409	0.0327941	0.484251	0.175695	0.24339	0.162681	0.339255	0.117529	0.0670498	0.107791	0.118324	0.0165992	0.797077	0.188286	0.166431	0.173725	0.163668
NK cells_CD25 (IL_2R)	0.0123349	NK cells	CD25 (IL_2R)	0.111014	0.217872	0	0	0.196532	0	0	0.683825	1.02706	0.108487	0.0959527	0.0771235	0.0689454	0	0.515907	1.32833	0	0.217482	0.0635572	0.444425	0.0771235	0.188089	0.0441856	0.0275965	0.629826	0	0.154781	0.0246975	0	0.0451846
NK cells_CD31/PECAM_1	0.419753	NK cells	CD31/PECAM_1	0.501146	0.00459998	0.00869989	0.0740323	0.152014	0.0689454	0.0737332	0.173724	0.435776	0.157251	0.211324	0.119912	0.28243	0.205941	0.0748301	0.435138	0.0809117	0.229773	0.120905	0.5337	0.173922	0.0323943	0.180813	0.249697	0.0476819	0.269332	0.30218	0.222461	0.20692	0.227532
NK cells_CD45RA	0.179595	NK cells	CD45RA	0.501146	1.10535	2.50658	2.69271	2.10538	3.45921	2.921	1.4656	1.64221	3.18286	2.82913	3.11247	2.53182	2.1977	1.86336	2.23829	2.5518	2.33968	2.62397	2.16585	2.76002	2.22425	2.53112	3.02183	2.23372	2.96929	1.6319	2.6841	3.29443	3.51305
NK cells_CD45RO	0.407414	NK cells	CD45RO	0.501146	0	0.0189989	0.131025	0.0771235	0.0553717	0.0579675	0.21367	0.435776	0.221094	0.251345	0.17274	0.379057	0.310583	0.167417	0.611559	0.12299	0.367099	0.252024	0.491741	0.152805	0.0807123	0.165444	0.212986	0.135881	0.322196	0.414986	0.129637	0.150135	0.24407
NK cells_CD49d	0.501146	NK cells	CD49d	0.501146	1.43113	0.888216	1.5698	1.52933	1.27897	1.04822	2.0869	2.28975	1.71794	2.03598	1.91003	1.94597	1.74519	1.78807	2.72222	1.68793	2.06149	1.7603	1.86297	1.54438	1.68546	1.87992	1.88457	2.14142	1.91413	1.48378	1.81731	1.43767	1.91909
NK cells_CD54	0.171848	NK cells	CD54	0.501146	0.229383	0.998702	0.451865	0.805742	0.278294	0.215527	0.331685	0.823438	0.480854	0.379337	0.606019	0.786401	1.07222	0.361383	1.20487	0.534486	1.06731	0.630158	1.20046	0.676747	0.830268	0.463432	0.679975	0.540844	0.623924	0.388735	0.517931	0.664017	0.67933
NK cells_CD69	0.468697	NK cells	CD69	0.501146	0.186124	3.52942	0.848325	2.90746	0.380828	0.380362	0.0712387	0.0833036	2.51248	0.632314	0.70065	1.64232	3.27344	3.24352	0.28368	2.84913	2.60134	3.01465	3.12765	0.975272	1.90282	2.24583	1.80933	3.31495	2.62675	2.08663	0.882151	3.27604	0.439148
NK cells_PDL1	0.320701	NK cells	PDL1	0.501146	0	0.057668	0.0488805	0.003	0.136179	0.00339999	0.120806	0.281661	0.258221	0.190839	0.0844994	0.235614	0.0785193	0.135881	0.677797	0.0401892	0.0920699	0.141725	0.247272	0.0481814	0.0271966	0.0817091	0.100033	0.214159	0.580622	0.0769241	0.0893809	0.0647547	0.137962
NK cells_Tbet	0.3721	NK cells	Tbet	0.501146	0.183764	1.50133	2.87295	1.03617	2.90906	1.42551	0.230161	0.205256	3.03926	2.62712	2.76472	1.56636	1.15289	0.475749	0.423341	1.60732	1.39221	1.37864	1.94771	2.12171	1.05183	2.10225	3.16928	0.487374	2.34171	1.32669	2.26248	1.46125	2.06987
Undefined_CD25 (IL_2R)	0.603374	Undefined	CD25 (IL_2R)	0.718067	5.41866	3.64721	0.763906	3.8857	3.82419	4.22298	4.16941	1.24066	3.58149	3.93073	3.82153	3.69218	3.81929	3.59199	3.60402	3.65144	3.60733	3.97222	3.74055	3.53196	0.356782	3.86554	3.71091	4.0827	1.73682	3.66778	3.49994	4.14213	3.75988
Undefined_CD28	0.647847	Undefined	CD28	0.718067	0	0	0.832171	0.0673057	0	0	0	1.417	0.623327	0.0101998	0.141131	0.136773	0	0	0.00579997	0	0.0384644	0	0.0365918	0.707562	1.69382	0	0.195748	0.261412	2.3324	0.0763259	0	0.0422848	0.130232
Undefined_CD31/PECAM_1	0.662974	Undefined	CD31/PECAM_1	0.718067	0	0.00519998	0.366163	0.193972	0.126937	0.00519997	0.190053	1.39291	0.742216	0.600538	0.578234	0.350951	0.280699	0	0.564705	0.318583	0.760833	0.132809	0.701128	0.490346	0.512472	0.463973	0.889974	0	2.17278	0.205158	0.41123	0.412798	0.339822
Undefined_CD36	0.141435	Undefined	CD36	0.718067	0	0	0	0.0763283	0.0130994	0.0678455	0	0.0692781	0.224408	0.378181	0.0559708	0.463432	0	0.690265	0.396342	0	0.0004	0.0609622	0	0	0	0.383521	0	0	0.317251	0	0.352782	0.207887	0.101625
Undefined_CD45RA	0.425287	Undefined	CD45RA	0.718067	5.00502	2.95682	0.67707	3.09201	2.8308	3.42983	3.42012	1.35602	2.22174	3.13625	3.3058	3.07577	3.14406	2.50983	2.62724	2.46732	2.98408	3.0797	2.98877	2.67161	0.159523	2.83174	3.16267	3.26104	0.810353	2.72065	2.98001	3.40811	3.14289
Undefined_CD45RO	0.428504	Undefined	CD45RO	0.718067	1.326	1.03592	2.97975	1.42582	1.62422	0.587145	1.00504	3.26014	2.4088	1.1892	1.37684	1.21293	1.13996	0.545535	1.6743	2.26318	1.03815	1.31142	1.41977	1.85624	3.30364	1.04757	1.63453	1.36463	3.95773	1.28253	1.04945	1.0836	1.32112
Undefined_CD49d	0.535139	Undefined	CD49d	0.718067	6.30423	4.28894	1.11451	4.21214	3.87476	4.56772	4.58848	1.67986	3.55115	4.37903	3.90468	4.17065	4.26643	3.87049	3.9419	3.08295	4.11135	3.77412	4.17416	4.22855	0.699535	4.05881	4.39645	4.43464	1.56396	3.99931	4.185	4.4702	4.16808
Undefined_CD54	0.431844	Undefined	CD54	0.718067	0.997794	0	0.618087	0.230051	0.141912	0	0	1.01559	0.606376	0	0.240087	0.115543	0	0	0.204374	0.144497	0.381486	0	0.186124	0.296715	0.63984	0.0519283	0.484072	0.0131996	1.25311	0.0453844	0.166317	0	0.070342
Undefined_CD86	0.503968	Undefined	CD86	0.718067	0	0	0.0946586	0.392693	0.0774207	0	0	2.44089	0.102579	0.0950564	0.442425	0	0.0579675	0	0.331306	0.311917	0	0	0.365788	0.41271	2.26326	0	0.288386	0	3.16471	0.121104	0.0930457	0	0.0617607
Undefined_FoxP3	0.650333	Undefined	FoxP3	0.718067	0.698419	0	0.0445852	0.0257902	0	0	0.0992368	0.536608	0.0177962	0	0.308102	0	0.0157993	0	0	0	0	0	0	0.0268963	0.122096	0	0.130628	0	0.18219	0	0	0	0
Undefined_Gata3	0.415444	Undefined	Gata3	0.718067	0.165247	0	0.112562	0	0	0	0	0.278793	0.0910568	0	0	0	0.0481814	0	0	0	0	0	0.494232	0.0290957	0.114748	0	0.136377	0	0.468115	0	0.13521	0	0
Undefined_PDL1	0.718067	Undefined	PDL1	0.718067	0.93138	0.0623596	2.30155	0.00689978	0	0	0	3.38458	0.145287	0	0.0493799	0	0	0	0.144101	0	0	0	0	0.294494	3.29561	0	0.139547	0	4.15124	0	0.0117997	0.0438823	0.00479998
