# Supplementary material for: Single-cell profiling reveals periventricular CD56bright NK cell accumulation in multiple sclerosis
Source: eLife. 2022 May 10;11:e73849. doi: 10.7554/eLife.73849 (PMC9135404; doi:10.7554/eLife.73849)
Supplement: Source data 3. — Median scaled intensities of the “state” (phenotype) markers for each cell population. [file elife-73849-data3.xlsx]

## Sheet: Proportions
Proportions
Blood general ADvsCon	p_val	p_adj	props_ad01	props_ad02	props_ad03	props_ad04	props_ad05	props_ad06	props_ad07	props_ad08	props_control01	props_control02	props_control03	props_control05	props_control06	props_control07	props_control08	props_control09	props_control10	props_control11	props_ms01	props_ms02	props_ms03	props_ms04	props_ms05	props_ms06	props_ms07	props_ms08	props_ms09	props_ms10	props_ms11	props_ms12
CD8+ T cells	0.3424	0.936	0.7	21.8	2.5	1.6	1.6	0.3	2.3	0.2	1.3	1.7	6.5	3.4	1	9.4	0.3	5.8	17.7	0.6	8.1	1.1	0.9	0.9	3.9	1	5.1	1.4	0.9	4.3	28.3	8.5
DCs	0.1093	0.936	0	2.4	0.6	0.1	0	0.4	1.6	0	0.7	1.8	0.3	0.9	0.6	0.8	0.1	0.2	4.3	0.1	1.8	0.1	1	0.1	2.3	0.3	1.1	0.2	1	5.7	3	4
gd T cells	0.416	0.936	0	1.6	2.1	0.2	0	0	0.2	0	0	0.1	0.6	0.1	0.3	0.5	0.4	1.2	5.4	0	1.4	0.8	0	0.1	0.5	0.6	0.1	0.1	0.2	0.2	5	0.9
NK T cells	0.3715	0.936	0	2.1	0.1	0	0	0	0.1	0	0.1	0.1	1.1	0	0.1	0.1	0.1	0.2	0.1	0	0.5	0	0	0	0	0	0.4	0.1	0.1	0	0	3.2
Granulocytes	0.6769	0.9517	95.7	21	80.3	94.5	92.3	86	77.6	95.5	91.6	66.6	75.2	79.4	86.8	65.3	95.2	85.9	35.1	97.1	58.7	95.3	81.3	82.4	44.1	93.7	59.7	92.3	84.2	26.9	41.4	35.9
Monocytes	0.6191	0.9517	1.5	2.3	5.6	2	3.3	4.9	5.9	2.2	2.6	3.1	5.9	5.9	6.2	10.9	2.4	1	6.2	1.3	13.1	1.7	6.1	6.7	1.6	1.1	14.5	2.6	5.3	4.2	4.4	3
NK cells	0.7659	0.9517	1.8	37.8	6.2	1	1.4	6.1	9.7	1.4	1.7	18.1	9.3	9.3	3.1	9.2	1.1	4.8	22.5	0.6	10.5	0.2	8.1	7.1	30.8	2	17.5	1.9	5.4	42.9	1.8	26.1
CD4+ T cells	0.9305	0.9517	0.2	9.1	2.4	0.4	1.1	1.9	2.3	0.6	1.8	6.9	0.8	0.8	0.9	3.4	0.3	0.7	8.3	0.1	5.2	0.6	2.2	1.7	11.8	1	1.2	0.9	2.2	13.1	14.5	15.9
B cell lineage	0.9517	0.9517	0.1	2	0.2	0.2	0.2	0.3	0.5	0.1	0.1	1.7	0.3	0.1	1	0.4	0.1	0.1	0.5	0.2	0.8	0.2	0.3	1	5.1	0.3	0.5	0.5	0.7	2.8	1.7	2.6
Blood general ADvsMS	p_val	p_adj	props_ad01	props_ad02	props_ad03	props_ad04	props_ad05	props_ad06	props_ad07	props_ad08	props_control01	props_control02	props_control03	props_control05	props_control06	props_control07	props_control08	props_control09	props_control10	props_control11	props_ms01	props_ms02	props_ms03	props_ms04	props_ms05	props_ms06	props_ms07	props_ms08	props_ms09	props_ms10	props_ms11	props_ms12
B cell lineage	0.006684	0.06016	0.1	2	0.2	0.2	0.2	0.3	0.5	0.1	0.1	1.7	0.3	0.1	1	0.4	0.1	0.1	0.5	0.2	0.8	0.2	0.3	1	5.1	0.3	0.5	0.5	0.7	2.8	1.7	2.6
DCs	0.02399	0.108	0	2.4	0.6	0.1	0	0.4	1.6	0	0.7	1.8	0.3	0.9	0.6	0.8	0.1	0.2	4.3	0.1	1.8	0.1	1	0.1	2.3	0.3	1.1	0.2	1	5.7	3	4
CD4+ T cells	0.07956	0.2387	0.2	9.1	2.4	0.4	1.1	1.9	2.3	0.6	1.8	6.9	0.8	0.8	0.9	3.4	0.3	0.7	8.3	0.1	5.2	0.6	2.2	1.7	11.8	1	1.2	0.9	2.2	13.1	14.5	15.9
Granulocytes	0.1346	0.2713	95.7	21	80.3	94.5	92.3	86	77.6	95.5	91.6	66.6	75.2	79.4	86.8	65.3	95.2	85.9	35.1	97.1	58.7	95.3	81.3	82.4	44.1	93.7	59.7	92.3	84.2	26.9	41.4	35.9
gd T cells	0.1507	0.2713	0	1.6	2.1	0.2	0	0	0.2	0	0	0.1	0.6	0.1	0.3	0.5	0.4	1.2	5.4	0	1.4	0.8	0	0.1	0.5	0.6	0.1	0.1	0.2	0.2	5	0.9
CD8+ T cells	0.2426	0.3639	0.7	21.8	2.5	1.6	1.6	0.3	2.3	0.2	1.3	1.7	6.5	3.4	1	9.4	0.3	5.8	17.7	0.6	8.1	1.1	0.9	0.9	3.9	1	5.1	1.4	0.9	4.3	28.3	8.5
Monocytes	0.3826	0.4144	1.5	2.3	5.6	2	3.3	4.9	5.9	2.2	2.6	3.1	5.9	5.9	6.2	10.9	2.4	1	6.2	1.3	13.1	1.7	6.1	6.7	1.6	1.1	14.5	2.6	5.3	4.2	4.4	3
NK cells	0.4144	0.4144	1.8	37.8	6.2	1	1.4	6.1	9.7	1.4	1.7	18.1	9.3	9.3	3.1	9.2	1.1	4.8	22.5	0.6	10.5	0.2	8.1	7.1	30.8	2	17.5	1.9	5.4	42.9	1.8	26.1
NK T cells	0.3435	0.4144	0	2.1	0.1	0	0	0	0.1	0	0.1	0.1	1.1	0	0.1	0.1	0.1	0.2	0.1	0	0.5	0	0	0	0	0	0.4	0.1	0.1	0	0	3.2
Blood general MSvsCon	p_val	p_adj	props_ad01	props_ad02	props_ad03	props_ad04	props_ad05	props_ad06	props_ad07	props_ad08	props_control01	props_control02	props_control03	props_control05	props_control06	props_control07	props_control08	props_control09	props_control10	props_control11	props_ms01	props_ms02	props_ms03	props_ms04	props_ms05	props_ms06	props_ms07	props_ms08	props_ms09	props_ms10	props_ms11	props_ms12
B cell lineage	0.004731	0.04258	0.1	2	0.2	0.2	0.2	0.3	0.5	0.1	0.1	1.7	0.3	0.1	1	0.4	0.1	0.1	0.5	0.2	0.8	0.2	0.3	1	5.1	0.3	0.5	0.5	0.7	2.8	1.7	2.6
CD4+ T cells	0.04934	0.222	0.2	9.1	2.4	0.4	1.1	1.9	2.3	0.6	1.8	6.9	0.8	0.8	0.9	3.4	0.3	0.7	8.3	0.1	5.2	0.6	2.2	1.7	11.8	1	1.2	0.9	2.2	13.1	14.5	15.9
Granulocytes	0.257	0.7711	95.7	21	80.3	94.5	92.3	86	77.6	95.5	91.6	66.6	75.2	79.4	86.8	65.3	95.2	85.9	35.1	97.1	58.7	95.3	81.3	82.4	44.1	93.7	59.7	92.3	84.2	26.9	41.4	35.9
NK cells	0.589	0.8835	1.8	37.8	6.2	1	1.4	6.1	9.7	1.4	1.7	18.1	9.3	9.3	3.1	9.2	1.1	4.8	22.5	0.6	10.5	0.2	8.1	7.1	30.8	2	17.5	1.9	5.4	42.9	1.8	26.1
DCs	0.5267	0.8835	0	2.4	0.6	0.1	0	0.4	1.6	0	0.7	1.8	0.3	0.9	0.6	0.8	0.1	0.2	4.3	0.1	1.8	0.1	1	0.1	2.3	0.3	1.1	0.2	1	5.7	3	4
gd T cells	0.5283	0.8835	0	1.6	2.1	0.2	0	0	0.2	0	0	0.1	0.6	0.1	0.3	0.5	0.4	1.2	5.4	0	1.4	0.8	0	0.1	0.5	0.6	0.1	0.1	0.2	0.2	5	0.9
Monocytes	0.704	0.9051	1.5	2.3	5.6	2	3.3	4.9	5.9	2.2	2.6	3.1	5.9	5.9	6.2	10.9	2.4	1	6.2	1.3	13.1	1.7	6.1	6.7	1.6	1.1	14.5	2.6	5.3	4.2	4.4	3
CD8+ T cells	0.8463	0.9521	0.7	21.8	2.5	1.6	1.6	0.3	2.3	0.2	1.3	1.7	6.5	3.4	1	9.4	0.3	5.8	17.7	0.6	8.1	1.1	0.9	0.9	3.9	1	5.1	1.4	0.9	4.3	28.3	8.5
NK T cells	0.9841	0.9841	0	2.1	0.1	0	0	0	0.1	0	0.1	0.1	1.1	0	0.1	0.1	0.1	0.2	0.1	0	0.5	0	0	0	0	0	0.4	0.1	0.1	0	0	3.2

## Sheet: Expression
Expression
unique
Blood general populations; MSvsCon	p_val	cluster_id	marker_id	p_adj	control01	ms06	ad08	ms07	ms12	ad06	ms05	control05	ms01	control03	ms02	ms11	ad05	control10	ad07	control08	control02	control06	ad04	ad01	control07	ad02	ms04	ms10	control09	ad03	ms08	ms09	ms03	control11
B cell lineage_CD31/PECAM_1	0.143422	B cell lineage	CD31/PECAM_1	0.573689	0.726252	0.580622	0.49876	0.621758	0.650207	0.668	0.995455	0.341333	0.355655	0.624673	0.439695	0.315538	0.389664	0.793627	0.44969	0.225581	0.0657526	0.364664	0.415354	0.382411	0.267498	0.375699	0.302371	0.676909	0.212693	0.263152	0.360726	0.453133	0.371309	0.293182
B cell lineage_CD45RA	0.852433	B cell lineage	CD45RA	0.852433	3.96442	3.22335	4.75373	3.9384	4.96229	4.09549	4.34132	3.92438	4.52882	3.90798	4.48296	4.49581	3.54008	4.44864	2.41401	2.38943	3.12247	3.98551	3.56668	3.21995	2.54695	4.21728	3.74974	4.50484	3.18783	3.79906	0.921934	2.1397	3.58454	3.05496
B cell lineage_CD45RO	0.497701	B cell lineage	CD45RO	0.828993	0.855759	0.973158	0.45113	0.759612	0.574476	0.703515	0.56565	0.727193	0.562297	0.645031	0.623924	0.570196	0.715712	0.745501	0.798425	0.641571	0.27685	0.462982	0.45431	0.544841	0.530206	0.222753	0.355279	0.283392	0.680539	0.385482	0.798574	0.831732	0.685121	0.530556
B cell lineage_CD49d	0.636815	B cell lineage	CD49d	0.849087	2.36884	2.91516	2.04743	2.72669	2.90214	2.17547	2.5458	2.94197	2.43216	1.99724	2.18826	2.71355	2.31318	2.79842	2.56008	2.51338	2.11465	2.83991	2.29687	2.53522	2.36118	2.57039	1.84585	2.41138	2.91804	2.45773	2.57042	2.91594	2.43769	2.20339
B cell lineage_CD54	0.473889	B cell lineage	CD54	0.828993	0.900686	1.28417	0.747042	1.634	0.839761	0.812134	0.737269	1.50539	0.784287	0.648152	0.636866	0.806189	0.652011	1.3303	1.22088	1.27238	0.173134	1.46191	0.781565	0.562297	0.955651	0.672379	0.337364	0.959063	1.55014	0.786853	0.797826	1.0625	2.05576	0.803804
B cell lineage_CD86	0.518121	B cell lineage	CD86	0.828993	1.24009	1.81293	0.898045	1.24606	0.716028	1.3088	0.735789	1.6145	1.02783	1.0713	1.15839	0.720047	1.45396	0.90215	1.5456	0.988674	0.423433	0.727741	0.711999	0.957726	0.989197	0.211421	0.620257	0.260446	1.19459	0.686092	1.43438	1.40422	0.977647	0.728759
B cell lineage_FoxP3	0.755383	B cell lineage	FoxP3	0.852433	2.48771	2.95881	2.29011	2.31075	1.68726	2.44371	1.55522	2.10921	2.09602	1.74512	1.64671	1.67943	2.31028	2.87414	1.75235	2.16942	2.17336	0.999351	1.89464	0.736879	2.06454	1.07111	0.403926	0.954645	1.59105	2.21303	1.80898	2.28016	2.52194	1.86424
B cell lineage_Tbet	0.133788	B cell lineage	Tbet	0.573689	0.0399893	0.113158	0	0.132809	0.0024	0	0	0.215723	0.505053	0	0	0.175596	0.0127996	0.0175991	0.344731	0	0.041588	0.126859	0.0707407	0	0.26663	0	0	0	1.28453	0.0586663	0	0.260059	0	0
CD4+ T cells_CD25 (IL_2R)	0.5595	CD4+ T cells	CD25 (IL_2R)	0.661228	0	0.0917711	0.16426	0.080214	0	0.544754	0.0690451	0.15063	0	0.106399	0.407434	0	0.133404	0	0.262959	0	0.551426	0.156362	0	0.0322944	0	0	0.322196	0.0451846	0	0	0	0	0.145387	0
CD4+ T cells_CD28	0.404378	CD4+ T cells	CD28	0.584102	2.80501	2.68059	1.97828	2.78934	1.10225	2.69298	2.4159	2.6955	0.101625	2.55434	2.71405	2.21493	2.63253	1.90707	2.52213	2.26108	2.60631	2.91652	1.09131	2.70673	2.32478	2.13863	3.05502	2.62294	0.136773	2.37179	2.85148	1.89802	2.91538	2.54404
CD4+ T cells_CD31/PECAM_1	0.248037	CD4+ T cells	CD31/PECAM_1	0.584102	0.382039	0.383621	0.193785	0.329789	0.366912	0.363164	0.490316	0.218946	0.181994	0.288578	0.272225	0.371589	0.28685	0.473148	0.27049	0.179534	0.158733	0.184157	0.167614	0.155769	0.183567	0.285313	0.117331	0.380548	0.102122	0.116139	0.149146	0.197906	0.275791	0.187303
CD4+ T cells_CD45RA	0.456144	CD4+ T cells	CD45RA	0.592987	1.35654	1.1744	4.57167	0.877337	1.1549	1.70767	2.35285	0.364476	0.753459	0.755846	3.29641	0.829681	0.925159	2.4331	0.840925	0.394209	1.14823	0.671569	0.584028	1.26059	0.23999	0.801714	0.224899	1.56532	0.289538	0.641819	0.339349	0.491563	1.39338	0.845573
CD4+ T cells_CD45RO	0.749368	CD4+ T cells	CD45RO	0.749368	1.70176	2.60757	0.671731	3.23512	2.39814	1.51897	1.27845	3.38604	2.59542	3.22602	1.16147	2.91425	2.79864	1.28407	2.14461	3.01475	1.58768	1.6924	2.29043	1.27581	2.50287	1.73313	2.71458	1.29615	3.55373	2.69188	2.00298	2.81605	1.48692	2.04793
CD4+ T cells_CD49d	0.141537	CD4+ T cells	CD49d	0.584102	1.5384	2.31169	1.27716	1.29293	2.96111	2.17433	0.814801	1.64753	2.98746	0.783456	0.835387	2.01125	1.57557	2.91861	1.05283	2.78211	1.70002	2.37739	2.92227	1.4963	2.5651	1.99107	2.14991	1.09348	2.87154	2.43873	1.63468	2.91061	1.1203	2.00014
CD4+ T cells_CD54	0.317519	CD4+ T cells	CD54	0.584102	0.0129996	0.315062	0	0.593617	0.103416	0.0263969	0	0.171065	0.0609622	0.0675486	0.128248	0	0.206529	0.188482	0.109978	0.18858	0	0.0259971	0.0319945	0	0.0529752	0	0	0	0.278486	0.12031	0.0704417	0.194374	0.24863	0.0101998
CD4+ T cells_CD69	0.247608	CD4+ T cells	CD69	0.584102	0.566594	0.431669	0.228019	0.874782	0.239504	0.329789	0.320295	0.375512	0.210639	0.546489	0.500448	0.284737	0.489069	0.500625	0.175498	0.362039	0.183174	0.196532	0.183764	0.0574683	0.0239977	0.0433864	0.0207985	0.00819991	0.949607	0.172543	0	0	0.0733343	0.126264
CD4+ T cells_CD86	0.256302	CD4+ T cells	CD86	0.584102	1.06989	1.81572	0.854967	1.24686	0.631402	0.974612	0.63364	1.16136	0.898243	1.06976	1.11036	0.547616	1.42437	0.688822	1.35005	0.723899	0.250764	0.604505	0.598267	0.752302	0.77603	0.113158	0.588107	0.138952	0.9642	0.57994	1.30366	1.20998	0.642808	0.6667
CD4+ T cells_FoxP3	0.297055	CD4+ T cells	FoxP3	0.584102	2.00433	2.24321	1.31001	2.11622	0.94927	1.84069	1.46481	1.80898	0.510355	0.962468	1.75726	1.17609	1.9577	1.80495	1.17361	1.04484	1.90861	0.63306	0.794678	1.40172	0.72915	0.496543	0.525831	0.841071	0.271936	1.16773	0.8801	1.47746	1.54442	1.45547
CD4+ T cells_Gata3	0.71638	CD4+ T cells	Gata3	0.749368	0.0837022	0.00699994	0	0.0695439	0.0477818	0	0.0406888	0.11743	0	0.0200986	0	0.0169992	0.0367917	0	0	0	0	0	0	0	0	0	0	0	0	0	0	0	0	0
CD4+ T cells_PD1	0.00659034	CD4+ T cells	PD1	0.0856745	0.242613	0.478437	0.00759993	0.622758	0.572252	0.158535	0.259575	1.00166	0.196532	0.525217	0.230162	0.574134	0.859857	0.535096	0.16998	1.75749	0.143111	0.965198	1.51542	0.062659	1.5664	0.460546	0.146278	0.189857	2.58313	1.61282	0.160214	0.760533	0.190741	0.306384
CD4+ T cells_Tbet	0.400207	CD4+ T cells	Tbet	0.584102	0.0427869	0.104311	0	0.245429	1.3309	0	0	0.12676	1.48456	0.0981424	0	0.245332	0.138061	0.673189	0	0.0781205	0	0	0.356031	0	0.441788	0.245137	0	0	1.36199	0.369719	0	0	0	0
CD8+ T cells_CD28	0.588753	CD8+ T cells	CD28	0.841076	1.74017	0.940761	0.577552	0.292223	0.3596	1.55437	1.76902	0.523727	0.0223981	0.175301	0.939812	0.125272	2.75095	0.178255	1.93233	0.715869	1.8743	2.24587	0	0.145288	0.581985	0	0.500713	0.941167	0	0.267981	2.00809	0.483804	1.82927	0.136377
CD8+ T cells_CD31/PECAM_1	0.269059	CD8+ T cells	CD31/PECAM_1	0.583918	1.04359	0.824689	0.636701	0.354903	0.413146	0.800967	1.22667	0.641489	0.83261	0.136575	0.469464	0.715712	0.682715	0.657085	0.515291	0.31449	0.600461	0.586579	0.0519766	1.07399	0.54883	0.539974	0.375512	1.04897	0.54154	0.330927	0.443334	0.774738	0.725782	0.107095
CD8+ T cells_CD45RA	0.87126	CD8+ T cells	CD45RA	0.882055	0.707485	1.47972	4.58492	3.07794	1.46507	1.97882	3.73898	0.790094	4.51288	1.12125	1.28082	2.2865	0.795878	4.08051	0.772761	0.730871	0.291648	0.742011	2.9295	3.03961	0.602821	2.32843	1.58647	3.54704	3.55205	1.09877	0.269718	0.828215	1.37632	1.69129
CD8+ T cells_CD45RO	0.882055	CD8+ T cells	CD45RO	0.882055	3.24257	1.66834	0.622425	1.03226	1.93018	1.23212	1.0439	2.57664	0.690425	1.82871	1.83164	1.28551	2.98226	0.650535	2.26001	1.57271	2.92193	1.81807	0.598436	0.584113	1.5694	0.756231	1.08847	0.804773	0.830487	2.06019	2.13196	1.60543	2.53634	0.732434
CD8+ T cells_CD49d	0.834375	CD8+ T cells	CD49d	0.882055	2.13304	2.76485	1.48024	2.16615	3.09946	2.53812	1.3503	2.7346	2.47887	2.73228	1.84748	3.30072	1.11155	2.61161	1.2103	2.71483	1.96726	1.75793	2.63976	2.21786	2.55454	2.40387	2.35136	2.15573	2.4642	2.66805	1.50285	3.17679	2.598	2.75989
CD8+ T cells_CD54	0.273693	CD8+ T cells	CD54	0.583918	0.227239	0.739992	0.271261	1.35296	0.301606	0.125272	0.0833036	0.370748	0.29529	0.222558	0.38511	0.154584	0.638684	0.515115	0.582496	0.456932	0.0427869	0.234836	0.294907	0.531081	0.272996	0.127058	0.14024	0.298163	0.692507	0.295481	0.289538	0.54701	0.874427	0.285409
CD8+ T cells_CD69	0.22854	CD8+ T cells	CD69	0.583918	1.11024	0.896425	0.687538	1.21773	0.617251	0.745423	0.692987	0.800145	0.591839	0.932471	2.12287	0.648073	2.19356	1.12841	0.233278	0.574476	1.06792	1.49537	0.334904	0.618838	0.159918	0.405957	0.374485	0.479243	2.33524	0.472429	0.248436	0.194472	0.545014	0.3596
CD8+ T cells_CD86	0.205114	CD8+ T cells	CD86	0.583918	1.07234	1.80955	1.02833	1.35219	0.673351	1.08101	0.68368	1.12953	0.905768	1.0936	1.22148	0.638354	1.50107	0.776562	1.37751	0.73828	0.239504	0.636205	0.619423	0.782322	0.782776	0.190447	0.570796	0.214257	0.962268	0.61959	1.20217	1.20866	0.827261	0.664342
CD8+ T cells_PD1	0.291959	CD8+ T cells	PD1	0.583918	2.8439	0.463072	0.0177991	0.00439999	0.195159	0.941032	0.0495797	1.79704	0.00759993	0.930152	1.25152	0	2.06718	0	1.7347	0.600714	0.451865	0.854391	0	0.367848	0.854607	0	0.226557	0.141032	0.608035	0.482464	0.690906	0.524429	2.00634	0.111071
CD8+ T cells_Tbet	0.58241	CD8+ T cells	Tbet	0.841076	0.56831	0.48157	0.276465	1.93613	1.7868	0.329979	0.225484	0.894885	1.20712	1.10976	0.873005	1.60071	0.469374	1.28971	0.17727	0.0186989	0.0533747	0.299502	0.838742	0.155473	0.631071	1.56227	0.316966	0.864587	1.34083	0.779293	0.306384	0	0.629909	0
DCs_CD25 (IL_2R)	0.768378	DCs	CD25 (IL_2R)	0.896441	0.0233979	0.0775223	0	0.002	0.292607	0.722642	0.0273966	0	0	0	0.00679995	0.207116	0	0.0215983	0.0231979	0	0	0.323242	0	0	0	0	0	0	0.101227	0	0.0327941	0	0	0.187892
DCs_CD31/PECAM_1	0.67922	DCs	CD31/PECAM_1	0.896441	4.21201	3.81482	3.98709	2.71247	2.99096	1.31643	3.44648	4.0559	4.04996	4.08046	4.13889	2.06234	4.0597	3.66288	3.45221	3.62493	3.7579	1.83146	3.78645	3.46929	2.54269	3.58027	2.48915	3.78948	3.72465	3.64933	3.04416	3.39358	3.7024	1.35857
DCs_CD36	0.902344	DCs	CD36	0.902344	1.94092	1.38158	0.758845	1.20559	0.703515	0.365413	2.38615	1.8553	2.35924	1.18586	0.678039	1.41142	1.37893	2.28352	2.91808	2.23019	1.64329	0.376912	1.53082	1.80713	2.7084	1.2587	1.6564	1.80425	1.04459	0.862725	2.44364	2.7791	0.747823	0.304391
DCs_CD49d	0.108536	DCs	CD49d	0.643319	3.76356	3.76482	3.05843	3.10722	3.26993	2.61476	3.88841	3.55635	3.63615	2.72507	3.47974	3.28455	3.73579	3.70051	4.11958	3.30472	3.2132	2.76031	3.50075	3.59583	3.55227	3.31087	3.45531	3.61656	3.40467	3.27135	3.7683	3.88104	3.03588	1.98534
DCs_CD54	0.313055	DCs	CD54	0.729903	2.59949	2.60277	2.16189	3.81958	1.6909	0.587428	2.96566	1.95142	2.37389	2.46857	3.65288	1.78026	2.2757	2.51447	2.89946	2.33603	1.06731	1.10494	1.85089	1.59698	2.01027	2.40581	1.87322	2.71278	3.59838	2.00613	1.83289	2.17062	2.66457	0.813596
DCs_CD86	0.417088	DCs	CD86	0.729903	2.87075	2.89577	2.0981	2.52088	1.75896	1.38977	2.22416	2.58513	2.15651	2.73264	2.23425	1.38413	2.56331	1.98607	2.5395	1.93867	1.78334	1.29843	1.69446	1.7185	1.90045	1.55623	1.73327	1.69318	2.24016	1.84705	2.21979	1.99738	1.94177	0.984412
DCs_PDL1	0.183805	DCs	PDL1	0.643319	1.48425	2.18213	1.08865	2.62045	1.056	1.33213	1.15013	1.78448	1.2608	1.54951	1.33971	0.833049	1.9048	1.14505	1.91188	1.13356	0.577637	0.948934	0.976988	1.67154	1.40848	0.487999	1.21162	0.616583	1.56692	1.13978	1.81845	1.67263	1.10189	0.764824
Granulocytes_CD31/PECAM_1	0.230359	Granulocytes	CD31/PECAM_1	0.650847	1.47946	1.97839	0.738125	1.19975	1.76134	1.23769	1.6522	0.979755	0.856839	0.909793	1.30386	1.39725	1.20647	1.65574	1.54878	1.0102	0.905629	1.20305	0.855111	0.91007	1.33134	1.38148	0.900616	1.5206	1.24495	0.841652	1.42169	1.08052	1.06188	1.06398
Granulocytes_CD49d	0.955781	Granulocytes	CD49d	0.955781	0.302754	0.492275	0.126066	0.432947	0.303136	0.509825	0.273767	0.207312	0.139745	0.603326	0.335851	0.221777	0.436232	0.416457	0.368409	0.40448	0.214746	0.162287	0.110972	0.221387	0.284929	0.227824	0.215528	0.170177	0.484965	0.145486	0.468475	0.400044	0.26856	0.231526
Granulocytes_CD54	0.337376	Granulocytes	CD54	0.650847	0.416457	0.54779	0.216505	1.96347	0.48996	0.321816	0.405404	0.394118	0.340578	0.360538	0.43532	0.453676	0.405773	0.713185	0.430206	0.145288	0.03909	0.521797	0.165444	0.234446	0.544667	0.258898	0.449327	0.430572	1.04133	0.208486	0.569854	0.449146	1.40778	0.452952
Granulocytes_CD86	0.488135	Granulocytes	CD86	0.650847	2.23797	2.68831	2.13924	2.19792	1.55785	2.05036	1.81172	2.13084	2.00571	1.97298	1.94412	1.68568	2.01251	1.80162	2.48852	1.55308	0.764518	1.45414	1.29043	1.4583	1.88777	1.16079	1.09817	1.15679	1.76932	1.32252	1.82657	2.13954	1.37247	1.49006
Monocytes_CD31/PECAM_1	0.608344	Monocytes	CD31/PECAM_1	0.608344	3.19238	2.90674	2.61392	2.48875	3.05002	3.37522	3.33818	3.116	3.1556	2.59649	2.62053	3.10936	2.64661	3.29527	3.24573	2.66774	2.33991	2.36557	3.01188	2.97492	2.74471	2.88552	2.87316	2.87733	2.68639	2.45822	2.46445	2.97562	2.72979	2.43192
Monocytes_CD36	0.431016	Monocytes	CD36	0.533848	3.86633	3.22296	3.15345	3.36622	4.4075	4.26798	4.62151	3.9753	3.93627	3.05187	3.15311	4.33869	2.71989	4.24291	4.28661	3.09531	3.28794	3.47602	3.16735	3.30989	3.77826	3.87486	3.60221	3.71617	3.25774	2.86343	3.39777	3.76175	3.21016	2.51531
Monocytes_CD45RA	0.346201	Monocytes	CD45RA	0.533848	0.742787	0.952565	2.91222	0.933425	0.879534	1.01872	0.721699	0.850639	0.631568	0.595901	0.888919	0.566937	1.30497	0.928649	0.709863	0.248727	0.383342	0.419121	0.849338	0.755462	0.482464	0.441151	0.682393	0.61357	0.751531	0.510796	0.47207	0.566938	0.403002	0.333579
Monocytes_CD49d	0.226028	Monocytes	CD49d	0.533848	2.79469	3.31812	0.614073	3.31065	3.16806	2.69471	2.93951	1.21816	1.79245	2.13679	1.11083	3.04081	2.09772	3.16494	3.33196	1.91506	1.82525	2.13098	1.26174	2.16732	2.5456	2.84478	2.5021	2.98543	2.91426	1.12013	2.40617	3.11936	1.5887	1.62926
Monocytes_CD54	0.444873	Monocytes	CD54	0.533848	2.12828	1.68493	1.63084	3.96369	2.32503	1.4179	2.70969	2.35609	2.31124	1.10726	2.04059	2.08919	2.38819	2.88448	2.40088	1.30361	0.728759	1.35982	1.4448	1.49554	1.60951	2.287	1.92821	2.58516	3.12019	0.922552	0.967458	1.96753	2.28614	1.34898
Monocytes_CD86	0.142618	Monocytes	CD86	0.533848	2.1676	2.17541	1.15472	2.12186	2.15704	2.58739	2.36152	2.0774	1.55458	1.74374	1.61981	1.8996	1.98099	2.168	2.37879	1.16386	1.17158	1.58611	1.33332	1.7596	1.8384	1.38907	1.63547	1.60133	1.56187	1.23684	1.79388	1.95971	1.44453	0.947923
NK T cells_CD28	0.536868	NK T cells	CD28	0.805302	0.0599641	0.866732	0.584369	0.370467	0.116933	0.484429	1.82544	0.31343	0.0249974	0.169192	0.354992	0.256161	2.86788	0.111767	1.84702	0.00919987	0.731887	2.724	0.0575682	0.55122	0.44388	0	0.310677	0.351609	0	0	1.75856	0.313442	2.51476	0.71096
NK T cells_CD31/PECAM_1	0.953076	NK T cells	CD31/PECAM_1	0.953076	0.245137	0.439695	0.257156	0.161102	0.0751293	0.343788	0.756539	0.794602	0.109183	0.198298	0.179632	1.04564	0.739059	0.649222	0.672055	0.0467829	0.379803	0.548483	0.0241976	0.663797	0.331306	0	0.38455	0.765347	0.145981	0	0.282622	0.16357	0.542842	0.436574
NK T cells_CD45RA	0.941988	NK T cells	CD45RA	0.953076	2.83659	1.60713	3.9397	3.33001	3.52513	2.61196	1.51046	1.97648	3.49746	2.98822	3.25569	5.08359	0.916291	4.10535	1.14459	1.48369	2.3713	0.61792	3.42845	3.18484	1.04759	3.27759	2.46777	2.26374	3.61171	2.87436	0.335851	0.985529	0.671357	0.529198
NK T cells_CD45RO	0.893	NK T cells	CD45RO	0.953076	0.76727	1.3893	0.445333	1.10404	0.606355	0.45114	1.78673	1.25896	0.41241	0.616415	1.07942	0.999149	3.0119	0.83845	1.8114	0.495121	0.852949	2.16769	0.564189	0.933965	1.0193	0.223534	0.780685	1.21297	0.62034	0.450596	1.81743	0.778686	2.71373	3.12263
NK T cells_CD49d	0.901163	NK T cells	CD49d	0.953076	2.28327	2.52455	1.25638	1.88498	2.25209	1.92533	1.52194	2.15034	1.7636	2.34132	2.51362	2.16558	1.16591	2.06269	0.926871	2.67001	1.63596	1.26122	1.99262	1.93993	1.90019	2.08931	1.22466	1.97239	2.32696	2.32611	1.55129	2.59371	1.85028	2.00868
NK T cells_CD54	0.254293	NK T cells	CD54	0.610304	0.423066	0.828068	0.134593	1.24069	0.200847	0.198494	0.341522	0.483176	0.0501789	0.341522	0.389849	0.351382	0.762067	0.516172	0.518635	0.246108	0	0.238532	0.367848	0.40193	0.315347	0.0841008	0.285494	0.272224	0.53623	0.31268	0.228701	0.574902	0.639253	0.362552
NK T cells_CD69	0.0868297	NK T cells	CD69	0.480504	1.04847	0.819532	0.834803	1.37056	0.189268	0.629411	1.03693	1.20878	0.329789	1.53247	1.83791	0.361385	2.10032	1.39043	0.146278	0.31001	0.270875	1.93669	0.159523	0.282621	0.0343932	0.135386	0.105028	0.396042	2.29858	0.398379	0.113456	0.156955	0.550078	0.639104
NK T cells_CD86	0.160168	NK T cells	CD86	0.480504	1.37247	1.7598	0.821007	1.4414	0.983435	1.22229	0.785948	1.24624	1.10069	1.24186	1.44273	0.711675	1.51918	0.945495	1.40718	0.879251	0.430024	0.673351	0.757154	0.847511	0.856407	0.294523	0.44877	0.576351	1.04277	0.789265	1.27374	1.33651	0.82674	0.644929
NK T cells_FoxP3	0.419218	NK T cells	FoxP3	0.805302	0.596239	1.55744	0.732512	1.33823	0.487286	0.912008	0.738436	0.493333	0.274153	0.301033	0.864725	0.712547	1.65662	1.34635	0.810353	0.395044	1.11569	0.240864	0.555575	0.919618	0.413514	0.00599996	0.218532	0.329126	0.161398	0.497786	0.191723	0.937913	1.21107	1.32963
NK T cells_PD1	0.127699	NK T cells	PD1	0.480504	0.0155994	0.0727358	0	0.0357924	0	0	0.930425	1.6076	0	0.0755282	0.0840011	0.0658445	1.66089	0	0.989589	0	0	0.471352	0.314204	0	0.416457	0	0.0436838	0.231721	2.07636	0	0.285217	0.026197	0.639145	0.415215
NK T cells_PDL1	0.128762	NK T cells	PDL1	0.480504	1.40107	1.75134	1.37684	1.54258	1.07503	1.38705	0.814209	1.33331	1.09733	1.24505	1.29995	0.763791	1.53222	0.953572	1.42687	0.963067	0.442789	0.821892	0.796927	0.811586	0.876841	0.406511	0.957433	0.526179	1.18842	0.999092	1.43762	1.39888	0.924953	0.749766
NK T cells_Tbet	0.508061	NK T cells	Tbet	0.805302	2.21368	0.656104	0.682393	2.30239	2.74144	1.731	1.05046	1.37993	2.21868	1.76467	1.19059	1.61701	0.578064	1.47746	0.0910741	0.29912	0.0165992	0.298545	1.19521	0.198002	0.942386	2.1612	1.38031	2.12256	1.73624	1.64135	0.515291	0.13152	0.364245	0.121401
NK cells_CD31/PECAM_1	0.0183212	NK cells	CD31/PECAM_1	0.164891	0.278198	0.469464	0.126264	0.230747	0.208291	0.325046	0.38762	0.128843	0.1613	0.199474	0.263539	0.900337	0.247369	0.237365	0.259092	0.157943	0.0714392	0.150036	0	0.0267968	0.1062	0.125867	0.0671495	0.719653	0	0	0.183076	0.207605	0.211617	0.160016
NK cells_CD31/PECAM_1	0.0183212	NK cells	CD31/PECAM_1	0.164891	0.278198	0.469464	0.126264	0.230747	0.208291	0.325046	0.38762	0.128843	0.1613	0.199474	0.263539	0.900337	0.247369	0.237365	0.259092	0.157943	0.0714392	0.150036	0	0.0267968	0.1062	0.125867	0.0671495	0.719653	0	0	0.183076	0.207605	0.211617	0.160016
NK cells_CD45RA	0.880974	NK cells	CD45RA	0.880974	2.85587	2.69812	3.80615	2.85747	3.57239	2.94586	3.39251	2.90266	3.87301	3.06862	4.02337	4.48582	3.28461	3.40188	1.40172	1.34411	2.59361	2.2869	3.28937	2.68704	1.79724	3.3609	2.8596	2.54272	3.22011	2.82803	0.45268	0.910208	2.69304	1.6924
NK cells_CD45RA	0.880974	NK cells	CD45RA	0.880974	2.85587	2.69812	3.80615	2.85747	3.57239	2.94586	3.39251	2.90266	3.87301	3.06862	4.02337	4.48582	3.28461	3.40188	1.40172	1.34411	2.59361	2.2869	3.28937	2.68704	1.79724	3.3609	2.8596	2.54272	3.22011	2.82803	0.45268	0.910208	2.69304	1.6924
NK cells_CD45RO	0.155885	NK cells	CD45RO	0.467655	0.753151	0.997859	0.351798	0.872578	0.592517	0.614742	0.628581	0.580026	0.440514	0.608791	0.80738	0.600124	0.720912	0.677878	0.805146	0.491029	0.291072	0.50346	0.325426	0.413698	0.497608	0.19349	0.298928	0.31001	0.529857	0.429201	0.688741	0.689383	0.53405	0.510531
NK cells_CD45RO	0.155885	NK cells	CD45RO	0.467655	0.753151	0.997859	0.351798	0.872578	0.592517	0.614742	0.628581	0.580026	0.440514	0.608791	0.80738	0.600124	0.720912	0.677878	0.805146	0.491029	0.291072	0.50346	0.325426	0.413698	0.497608	0.19349	0.298928	0.31001	0.529857	0.429201	0.688741	0.689383	0.53405	0.510531
NK cells_CD49d	0.878676	NK cells	CD49d	0.880974	2.12765	3.08797	1.64418	1.93327	2.10734	1.96016	2.25711	1.80761	1.48473	2.21193	2.03701	2.27968	2.04643	2.35074	2.08168	2.26417	1.95306	2.1812	1.63791	1.81857	2.12718	1.86614	1.64623	1.77375	2.49629	2.14387	1.99037	2.48508	2.10269	1.8694
NK cells_CD49d	0.878676	NK cells	CD49d	0.880974	2.12765	3.08797	1.64418	1.93327	2.10734	1.96016	2.25711	1.80761	1.48473	2.21193	2.03701	2.27968	2.04643	2.35074	2.08168	2.26417	1.95306	2.1812	1.63791	1.81857	2.12718	1.86614	1.64623	1.77375	2.49629	2.14387	1.99037	2.48508	2.10269	1.8694
NK cells_CD54	0.107591	NK cells	CD54	0.467655	0.604168	1.245	0.200063	1.49605	0.313252	0.282046	0.500448	0.343033	0.118224	0.424166	0.874711	1.00621	1.01738	0.309438	0.565392	0.362602	0.041588	0.450778	0.378498	0.256382	0.359975	0.127851	0.187794	0.259865	0.605009	0.341144	0.308007	0.434499	0.679814	0.402818
NK cells_CD54	0.107591	NK cells	CD54	0.467655	0.604168	1.245	0.200063	1.49605	0.313252	0.282046	0.500448	0.343033	0.118224	0.424166	0.874711	1.00621	1.01738	0.309438	0.565392	0.362602	0.041588	0.450778	0.378498	0.256382	0.359975	0.127851	0.187794	0.259865	0.605009	0.341144	0.308007	0.434499	0.679814	0.402818
NK cells_CD69	0.852422	NK cells	CD69	0.880974	1.0368	0.76956	0.383993	2.22528	0.35114	0.550388	0.648401	1.46138	0.347937	1.5009	1.81159	2.40638	0.681829	0.899221	0.290113	0.256576	0.479959	0.495654	0.0201986	0.204766	0	0.160312	0.0790177	0.538408	1.96898	0.460546	0	0	0.307911	0.176679
NK cells_CD69	0.852422	NK cells	CD69	0.880974	1.0368	0.76956	0.383993	2.22528	0.35114	0.550388	0.648401	1.46138	0.347937	1.5009	1.81159	2.40638	0.681829	0.899221	0.290113	0.256576	0.479959	0.495654	0.0201986	0.204766	0	0.160312	0.0790177	0.538408	1.96898	0.460546	0	0	0.307911	0.176679
NK cells_CD86	0.232894	NK cells	CD86	0.524013	1.3653	2.04594	1.08889	1.44099	1.03023	1.41501	1.05792	1.43493	1.14059	1.23796	1.40986	0.729072	1.45706	1.03504	1.82116	0.908822	0.440969	0.951154	0.749755	1.02045	1.03441	0.327324	0.708595	0.47566	1.12042	0.876841	1.38148	1.36463	0.92413	0.763063
NK cells_CD86	0.232894	NK cells	CD86	0.524013	1.3653	2.04594	1.08889	1.44099	1.03023	1.41501	1.05792	1.43493	1.14059	1.23796	1.40986	0.729072	1.45706	1.03504	1.82116	0.908822	0.440969	0.951154	0.749755	1.02045	1.03441	0.327324	0.708595	0.47566	1.12042	0.876841	1.38148	1.36463	0.92413	0.763063
NK cells_PDL1	0.307341	NK cells	PDL1	0.553214	1.41161	2.0162	1.13151	1.49997	1.06027	1.42488	1.06386	1.45485	1.09853	1.25327	1.29482	0.708912	1.43299	1.07381	1.81908	0.988021	0.545188	1.05817	0.846153	1.06126	1.12066	0.442607	0.812431	0.555057	1.29186	1.00414	1.49869	1.46125	1.02172	0.819384
NK cells_PDL1	0.307341	NK cells	PDL1	0.553214	1.41161	2.0162	1.13151	1.49997	1.06027	1.42488	1.06386	1.45485	1.09853	1.25327	1.29482	0.708912	1.43299	1.07381	1.81908	0.988021	0.545188	1.05817	0.846153	1.06126	1.12066	0.442607	0.812431	0.555057	1.29186	1.00414	1.49869	1.46125	1.02172	0.819384
NK cells_Tbet	0.650372	NK cells	Tbet	0.880974	1.76832	0.67933	0.970702	2.98237	2.65613	1.51256	2.38085	1.87945	2.1413	1.40658	0.652503	1.55348	1.13017	2.00603	0.370654	0.140933	0.612565	0.949674	1.24079	0.476556	0.991417	1.9537	1.03061	2.40752	1.92662	1.53733	0.378777	0.0215983	0.42728	0
NK cells_Tbet	0.650372	NK cells	Tbet	0.880974	1.76832	0.67933	0.970702	2.98237	2.65613	1.51256	2.38085	1.87945	2.1413	1.40658	0.652503	1.55348	1.13017	2.00603	0.370654	0.140933	0.612565	0.949674	1.24079	0.476556	0.991417	1.9537	1.03061	2.40752	1.92662	1.53733	0.378777	0.0215983	0.42728	0
gd T cells_CD28	0.775842	gd T cells	CD28	0.877775	1.82305	0.259091	0.0942604	0.690577	0.103018	0.533988	0.326375	0.256188	0	0.070741	0.12428	0.0026	1.93957	0.0741321	1.68482	0.0140995	0.392305	0.0431866	0	0.492483	0.0928665	0	0.060163	0.428926	0	0.017999	0.243487	0.205647	1.00724	0.385203
gd T cells_CD31/PECAM_1	0.929284	gd T cells	CD31/PECAM_1	0.929284	0.481748	1.03239	0.128447	0.288674	0.15893	0.40688	0.496188	0.598098	0.372056	0.136476	0.476377	0.374952	0.9127	1.06324	0.301989	0.430663	0.445584	0.202611	0.484965	0.29249	0.534224	0	0.0241976	0.410015	0.577552	0.246884	0.416824	1.23077	0.537885	0.294523
gd T cells_CD45RA	0.458719	gd T cells	CD45RA	0.694167	1.58493	3.31017	4.38338	2.38018	4.1839	3.12871	1.28756	3.21648	4.61405	2.48533	4.70732	4.54906	1.1569	4.94794	0.707009	2.48406	1.45662	1.26509	4.08832	1.1878	3.15624	2.24296	3.07358	1.69197	4.44298	4.47495	0.589889	1.35214	1.31051	1.6589
gd T cells_CD45RO	0.504849	gd T cells	CD45RO	0.694167	1.94025	0.872222	0.104211	1.37886	0.665562	0.912976	1.50683	0.98985	0.352363	0.719181	0.618337	0.518986	2.5972	0.559714	3.09317	0.427737	1.2063	0.877125	0.235419	1.14187	0.468295	0.345863	0.678503	1.16545	0.489782	0.34624	0.624423	0.663121	2.09974	0.808123
gd T cells_CD49d	0.168563	gd T cells	CD49d	0.694167	2.28457	3.11619	1.83837	2.03268	2.53298	2.12008	2.47367	2.06119	2.20954	2.55155	2.63617	2.96414	2.11693	2.58797	0.688661	2.54712	2.30668	2.33171	2.12783	2.26556	2.35691	2.21158	2.09498	2.18773	1.8054	2.42485	2.33409	3.00138	2.36774	2.2503
gd T cells_CD54	0.35243	gd T cells	CD54	0.694167	0.449871	1.11954	0	1.83601	0.51758	0.251197	0.368222	0.571909	0.149048	0.380921	0.544494	0.694587	0.550388	0.746972	0.596408	0.86165	0.175104	0.133007	0.789265	0.172715	0.549522	0.274346	0.267112	0.392634	1.4904	0.699535	0.637197	0.811392	1.43592	0.202415
gd T cells_CD69	0.797978	gd T cells	CD69	0.877775	1.30335	1.61515	0.438237	2.35582	0.441879	0.76597	0.628083	1.04609	0.631817	0.747127	2.96596	1.13519	1.05171	2.15212	0.0835029	0.599111	0.288768	0.371776	0.201435	0.0426861	0.0589658	0.0601637	0.365038	0.318774	2.80163	0.881798	0.0601636	0.578063	0.544146	0.0317946
gd T cells_CD86	0.328446	gd T cells	CD86	0.694167	1.28335	1.88904	1.04045	1.21784	0.783834	1.07711	0.790169	1.18998	1.05823	1.17784	1.26958	0.693147	1.40469	0.865159	1.35044	0.799996	0.19102	0.772456	0.658146	0.893606	0.808421	0.274249	0.538843	0.229773	0.964	0.722485	1.24069	1.31232	0.744649	0.923445
gd T cells_FoxP3	0.336484	gd T cells	FoxP3	0.694167	0.816133	1.76084	0.319344	1.63253	0.567281	1.18976	0.657902	1.00362	0.395415	0.593955	0.906463	0.710813	1.28787	1.37161	0.770628	0.377938	1.52062	0.281469	0.675616	0.933775	0.607867	0.0534745	0.265172	0.221973	0.410568	0.889412	0.266146	1.08859	1.30416	0.565048
gd T cells_PD1	0.376783	gd T cells	PD1	0.694167	1.25827	1.92756	1.17688	2.15991	1.40829	0.819753	0.0585665	1.81217	0.728758	0.495832	1.86847	0	3.00317	0	0.766048	0.955047	0.272043	0.175498	0.27444	0.306545	0.737658	0	0	0.546923	2.54914	0.128248	0.715542	2.95729	1.1972	1.34966
gd T cells_Tbet	0.494878	gd T cells	Tbet	0.694167	1.06952	0.641654	0.619423	1.568	2.16936	0.579268	1.61074	0.821597	1.86696	1.36223	1.34947	1.42433	0.487642	1.48179	0.223924	0.203884	0.223322	0.92509	0.701765	0.248435	0.889412	1.82444	0.795802	1.58627	0.941032	0.82307	0.210541	0	0.323716	0.0886837
Blood general populations; ADvsMS	p_val	cluster_id	marker_id	p_adj	control01	ms06	ad08	ms07	ms12	ad06	ms05	control05	ms01	control03	ms02	ms11	ad05	control10	ad07	control08	control02	control06	ad04	ad01	control07	ad02	ms04	ms10	control09	ad03	ms08	ms09	ms03	control11
B cell lineage_CD31/PECAM_1	0.211634	B cell lineage	CD31/PECAM_1	0.423267	0.726252	0.580622	0.49876	0.621758	0.650207	0.668	0.995455	0.341333	0.355655	0.624673	0.439695	0.315538	0.389664	0.793627	0.44969	0.225581	0.0657526	0.364664	0.415354	0.382411	0.267498	0.375699	0.302371	0.676909	0.212693	0.263152	0.360726	0.453133	0.371309	0.293182
B cell lineage_CD45RA	0.817308	B cell lineage	CD45RA	0.817308	3.96442	3.22335	4.75373	3.9384	4.96229	4.09549	4.34132	3.92438	4.52882	3.90798	4.48296	4.49581	3.54008	4.44864	2.41401	2.38943	3.12247	3.98551	3.56668	3.21995	2.54695	4.21728	3.74974	4.50484	3.18783	3.79906	0.921934	2.1397	3.58454	3.05496
B cell lineage_CD45RO	0.14748	B cell lineage	CD45RO	0.393279	0.855759	0.973158	0.45113	0.759612	0.574476	0.703515	0.56565	0.727193	0.562297	0.645031	0.623924	0.570196	0.715712	0.745501	0.798425	0.641571	0.27685	0.462982	0.45431	0.544841	0.530206	0.222753	0.355279	0.283392	0.680539	0.385482	0.798574	0.831732	0.685121	0.530556
B cell lineage_CD49d	0.095835	B cell lineage	CD49d	0.393279	2.36884	2.91516	2.04743	2.72669	2.90214	2.17547	2.5458	2.94197	2.43216	1.99724	2.18826	2.71355	2.31318	2.79842	2.56008	2.51338	2.11465	2.83991	2.29687	2.53522	2.36118	2.57039	1.84585	2.41138	2.91804	2.45773	2.57042	2.91594	2.43769	2.20339
B cell lineage_CD54	0.101893	B cell lineage	CD54	0.393279	0.900686	1.28417	0.747042	1.634	0.839761	0.812134	0.737269	1.50539	0.784287	0.648152	0.636866	0.806189	0.652011	1.3303	1.22088	1.27238	0.173134	1.46191	0.781565	0.562297	0.955651	0.672379	0.337364	0.959063	1.55014	0.786853	0.797826	1.0625	2.05576	0.803804
B cell lineage_CD86	0.627303	B cell lineage	CD86	0.817308	1.24009	1.81293	0.898045	1.24606	0.716028	1.3088	0.735789	1.6145	1.02783	1.0713	1.15839	0.720047	1.45396	0.90215	1.5456	0.988674	0.423433	0.727741	0.711999	0.957726	0.989197	0.211421	0.620257	0.260446	1.19459	0.686092	1.43438	1.40422	0.977647	0.728759
B cell lineage_FoxP3	0.787029	B cell lineage	FoxP3	0.817308	2.48771	2.95881	2.29011	2.31075	1.68726	2.44371	1.55522	2.10921	2.09602	1.74512	1.64671	1.67943	2.31028	2.87414	1.75235	2.16942	2.17336	0.999351	1.89464	0.736879	2.06454	1.07111	0.403926	0.954645	1.59105	2.21303	1.80898	2.28016	2.52194	1.86424
B cell lineage_Tbet	0.804836	B cell lineage	Tbet	0.817308	0.0399893	0.113158	0	0.132809	0.0024	0	0	0.215723	0.505053	0	0	0.175596	0.0127996	0.0175991	0.344731	0	0.041588	0.126859	0.0707407	0	0.26663	0	0	0	1.28453	0.0586663	0	0.260059	0	0
CD4+ T cells_CD25 (IL_2R)	0.532084	CD4+ T cells	CD25 (IL_2R)	0.912345	0	0.0917711	0.16426	0.080214	0	0.544754	0.0690451	0.15063	0	0.106399	0.407434	0	0.133404	0	0.262959	0	0.551426	0.156362	0	0.0322944	0	0	0.322196	0.0451846	0	0	0	0	0.145387	0
CD4+ T cells_CD28	0.912288	CD4+ T cells	CD28	0.912345	2.80501	2.68059	1.97828	2.78934	1.10225	2.69298	2.4159	2.6955	0.101625	2.55434	2.71405	2.21493	2.63253	1.90707	2.52213	2.26108	2.60631	2.91652	1.09131	2.70673	2.32478	2.13863	3.05502	2.62294	0.136773	2.37179	2.85148	1.89802	2.91538	2.54404
CD4+ T cells_CD31/PECAM_1	0.226271	CD4+ T cells	CD31/PECAM_1	0.912345	0.382039	0.383621	0.193785	0.329789	0.366912	0.363164	0.490316	0.218946	0.181994	0.288578	0.272225	0.371589	0.28685	0.473148	0.27049	0.179534	0.158733	0.184157	0.167614	0.155769	0.183567	0.285313	0.117331	0.380548	0.102122	0.116139	0.149146	0.197906	0.275791	0.187303
CD4+ T cells_CD45RA	0.902427	CD4+ T cells	CD45RA	0.912345	1.35654	1.1744	4.57167	0.877337	1.1549	1.70767	2.35285	0.364476	0.753459	0.755846	3.29641	0.829681	0.925159	2.4331	0.840925	0.394209	1.14823	0.671569	0.584028	1.26059	0.23999	0.801714	0.224899	1.56532	0.289538	0.641819	0.339349	0.491563	1.39338	0.845573
CD4+ T cells_CD45RO	0.624071	CD4+ T cells	CD45RO	0.912345	1.70176	2.60757	0.671731	3.23512	2.39814	1.51897	1.27845	3.38604	2.59542	3.22602	1.16147	2.91425	2.79864	1.28407	2.14461	3.01475	1.58768	1.6924	2.29043	1.27581	2.50287	1.73313	2.71458	1.29615	3.55373	2.69188	2.00298	2.81605	1.48692	2.04793
CD4+ T cells_CD49d	0.912345	CD4+ T cells	CD49d	0.912345	1.5384	2.31169	1.27716	1.29293	2.96111	2.17433	0.814801	1.64753	2.98746	0.783456	0.835387	2.01125	1.57557	2.91861	1.05283	2.78211	1.70002	2.37739	2.92227	1.4963	2.5651	1.99107	2.14991	1.09348	2.87154	2.43873	1.63468	2.91061	1.1203	2.00014
CD4+ T cells_CD54	0.172929	CD4+ T cells	CD54	0.912345	0.0129996	0.315062	0	0.593617	0.103416	0.0263969	0	0.171065	0.0609622	0.0675486	0.128248	0	0.206529	0.188482	0.109978	0.18858	0	0.0259971	0.0319945	0	0.0529752	0	0	0	0.278486	0.12031	0.0704417	0.194374	0.24863	0.0101998
CD4+ T cells_CD69	0.832034	CD4+ T cells	CD69	0.912345	0.566594	0.431669	0.228019	0.874782	0.239504	0.329789	0.320295	0.375512	0.210639	0.546489	0.500448	0.284737	0.489069	0.500625	0.175498	0.362039	0.183174	0.196532	0.183764	0.0574683	0.0239977	0.0433864	0.0207985	0.00819991	0.949607	0.172543	0	0	0.0733343	0.126264
CD4+ T cells_CD86	0.52092	CD4+ T cells	CD86	0.912345	1.06989	1.81572	0.854967	1.24686	0.631402	0.974612	0.63364	1.16136	0.898243	1.06976	1.11036	0.547616	1.42437	0.688822	1.35005	0.723899	0.250764	0.604505	0.598267	0.752302	0.77603	0.113158	0.588107	0.138952	0.9642	0.57994	1.30366	1.20998	0.642808	0.6667
CD4+ T cells_FoxP3	0.864677	CD4+ T cells	FoxP3	0.912345	2.00433	2.24321	1.31001	2.11622	0.94927	1.84069	1.46481	1.80898	0.510355	0.962468	1.75726	1.17609	1.9577	1.80495	1.17361	1.04484	1.90861	0.63306	0.794678	1.40172	0.72915	0.496543	0.525831	0.841071	0.271936	1.16773	0.8801	1.47746	1.54442	1.45547
CD4+ T cells_Gata3	0.478345	CD4+ T cells	Gata3	0.912345	0.0837022	0.00699994	0	0.0695439	0.0477818	0	0.0406888	0.11743	0	0.0200986	0	0.0169992	0.0367917	0	0	0	0	0	0	0	0	0	0	0	0	0	0	0	0	0
CD4+ T cells_PD1	0.251769	CD4+ T cells	PD1	0.912345	0.242613	0.478437	0.00759993	0.622758	0.572252	0.158535	0.259575	1.00166	0.196532	0.525217	0.230162	0.574134	0.859857	0.535096	0.16998	1.75749	0.143111	0.965198	1.51542	0.062659	1.5664	0.460546	0.146278	0.189857	2.58313	1.61282	0.160214	0.760533	0.190741	0.306384
CD4+ T cells_Tbet	0.675859	CD4+ T cells	Tbet	0.912345	0.0427869	0.104311	0	0.245429	1.3309	0	0	0.12676	1.48456	0.0981424	0	0.245332	0.138061	0.673189	0	0.0781205	0	0	0.356031	0	0.441788	0.245137	0	0	1.36199	0.369719	0	0	0	0
CD8+ T cells_CD28	0.677353	CD8+ T cells	CD28	0.846692	1.74017	0.940761	0.577552	0.292223	0.3596	1.55437	1.76902	0.523727	0.0223981	0.175301	0.939812	0.125272	2.75095	0.178255	1.93233	0.715869	1.8743	2.24587	0	0.145288	0.581985	0	0.500713	0.941167	0	0.267981	2.00809	0.483804	1.82927	0.136377
CD8+ T cells_CD31/PECAM_1	0.60324	CD8+ T cells	CD31/PECAM_1	0.846692	1.04359	0.824689	0.636701	0.354903	0.413146	0.800967	1.22667	0.641489	0.83261	0.136575	0.469464	0.715712	0.682715	0.657085	0.515291	0.31449	0.600461	0.586579	0.0519766	1.07399	0.54883	0.539974	0.375512	1.04897	0.54154	0.330927	0.443334	0.774738	0.725782	0.107095
CD8+ T cells_CD45RA	0.985998	CD8+ T cells	CD45RA	0.985998	0.707485	1.47972	4.58492	3.07794	1.46507	1.97882	3.73898	0.790094	4.51288	1.12125	1.28082	2.2865	0.795878	4.08051	0.772761	0.730871	0.291648	0.742011	2.9295	3.03961	0.602821	2.32843	1.58647	3.54704	3.55205	1.09877	0.269718	0.828215	1.37632	1.69129
CD8+ T cells_CD45RO	0.882981	CD8+ T cells	CD45RO	0.98109	3.24257	1.66834	0.622425	1.03226	1.93018	1.23212	1.0439	2.57664	0.690425	1.82871	1.83164	1.28551	2.98226	0.650535	2.26001	1.57271	2.92193	1.81807	0.598436	0.584113	1.5694	0.756231	1.08847	0.804773	0.830487	2.06019	2.13196	1.60543	2.53634	0.732434
CD8+ T cells_CD49d	0.165274	CD8+ T cells	CD49d	0.846692	2.13304	2.76485	1.48024	2.16615	3.09946	2.53812	1.3503	2.7346	2.47887	2.73228	1.84748	3.30072	1.11155	2.61161	1.2103	2.71483	1.96726	1.75793	2.63976	2.21786	2.55454	2.40387	2.35136	2.15573	2.4642	2.66805	1.50285	3.17679	2.598	2.75989
CD8+ T cells_CD54	0.384764	CD8+ T cells	CD54	0.846692	0.227239	0.739992	0.271261	1.35296	0.301606	0.125272	0.0833036	0.370748	0.29529	0.222558	0.38511	0.154584	0.638684	0.515115	0.582496	0.456932	0.0427869	0.234836	0.294907	0.531081	0.272996	0.127058	0.14024	0.298163	0.692507	0.295481	0.289538	0.54701	0.874427	0.285409
CD8+ T cells_CD69	0.575719	CD8+ T cells	CD69	0.846692	1.11024	0.896425	0.687538	1.21773	0.617251	0.745423	0.692987	0.800145	0.591839	0.932471	2.12287	0.648073	2.19356	1.12841	0.233278	0.574476	1.06792	1.49537	0.334904	0.618838	0.159918	0.405957	0.374485	0.479243	2.33524	0.472429	0.248436	0.194472	0.545014	0.3596
CD8+ T cells_CD86	0.591076	CD8+ T cells	CD86	0.846692	1.07234	1.80955	1.02833	1.35219	0.673351	1.08101	0.68368	1.12953	0.905768	1.0936	1.22148	0.638354	1.50107	0.776562	1.37751	0.73828	0.239504	0.636205	0.619423	0.782322	0.782776	0.190447	0.570796	0.214257	0.962268	0.61959	1.20217	1.20866	0.827261	0.664342
CD8+ T cells_PD1	0.242022	CD8+ T cells	PD1	0.846692	2.8439	0.463072	0.0177991	0.00439999	0.195159	0.941032	0.0495797	1.79704	0.00759993	0.930152	1.25152	0	2.06718	0	1.7347	0.600714	0.451865	0.854391	0	0.367848	0.854607	0	0.226557	0.141032	0.608035	0.482464	0.690906	0.524429	2.00634	0.111071
CD8+ T cells_Tbet	0.381029	CD8+ T cells	Tbet	0.846692	0.56831	0.48157	0.276465	1.93613	1.7868	0.329979	0.225484	0.894885	1.20712	1.10976	0.873005	1.60071	0.469374	1.28971	0.17727	0.0186989	0.0533747	0.299502	0.838742	0.155473	0.631071	1.56227	0.316966	0.864587	1.34083	0.779293	0.306384	0	0.629909	0
DCs_CD25 (IL_2R)	0.749586	DCs	CD25 (IL_2R)	0.749586	0.0233979	0.0775223	0	0.002	0.292607	0.722642	0.0273966	0	0	0	0.00679995	0.207116	0	0.0215983	0.0231979	0	0	0.323242	0	0	0	0	0	0	0.101227	0	0.0327941	0	0	0.187892
DCs_CD31/PECAM_1	0.625321	DCs	CD31/PECAM_1	0.749586	4.21201	3.81482	3.98709	2.71247	2.99096	1.31643	3.44648	4.0559	4.04996	4.08046	4.13889	2.06234	4.0597	3.66288	3.45221	3.62493	3.7579	1.83146	3.78645	3.46929	2.54269	3.58027	2.48915	3.78948	3.72465	3.64933	3.04416	3.39358	3.7024	1.35857
DCs_CD36	0.485018	DCs	CD36	0.749586	1.94092	1.38158	0.758845	1.20559	0.703515	0.365413	2.38615	1.8553	2.35924	1.18586	0.678039	1.41142	1.37893	2.28352	2.91808	2.23019	1.64329	0.376912	1.53082	1.80713	2.7084	1.2587	1.6564	1.80425	1.04459	0.862725	2.44364	2.7791	0.747823	0.304391
DCs_CD49d	0.714031	DCs	CD49d	0.749586	3.76356	3.76482	3.05843	3.10722	3.26993	2.61476	3.88841	3.55635	3.63615	2.72507	3.47974	3.28455	3.73579	3.70051	4.11958	3.30472	3.2132	2.76031	3.50075	3.59583	3.55227	3.31087	3.45531	3.61656	3.40467	3.27135	3.7683	3.88104	3.03588	1.98534
DCs_CD54	0.13872	DCs	CD54	0.749586	2.59949	2.60277	2.16189	3.81958	1.6909	0.587428	2.96566	1.95142	2.37389	2.46857	3.65288	1.78026	2.2757	2.51447	2.89946	2.33603	1.06731	1.10494	1.85089	1.59698	2.01027	2.40581	1.87322	2.71278	3.59838	2.00613	1.83289	2.17062	2.66457	0.813596
DCs_CD86	0.456123	DCs	CD86	0.749586	2.87075	2.89577	2.0981	2.52088	1.75896	1.38977	2.22416	2.58513	2.15651	2.73264	2.23425	1.38413	2.56331	1.98607	2.5395	1.93867	1.78334	1.29843	1.69446	1.7185	1.90045	1.55623	1.73327	1.69318	2.24016	1.84705	2.21979	1.99738	1.94177	0.984412
DCs_PDL1	0.519526	DCs	PDL1	0.749586	1.48425	2.18213	1.08865	2.62045	1.056	1.33213	1.15013	1.78448	1.2608	1.54951	1.33971	0.833049	1.9048	1.14505	1.91188	1.13356	0.577637	0.948934	0.976988	1.67154	1.40848	0.487999	1.21162	0.616583	1.56692	1.13978	1.81845	1.67263	1.10189	0.764824
Granulocytes_CD31/PECAM_1	0.0376198	Granulocytes	CD31/PECAM_1	0.0752396	1.47946	1.97839	0.738125	1.19975	1.76134	1.23769	1.6522	0.979755	0.856839	0.909793	1.30386	1.39725	1.20647	1.65574	1.54878	1.0102	0.905629	1.20305	0.855111	0.91007	1.33134	1.38148	0.900616	1.5206	1.24495	0.841652	1.42169	1.08052	1.06188	1.06398
Granulocytes_CD49d	0.323601	Granulocytes	CD49d	0.381002	0.302754	0.492275	0.126066	0.432947	0.303136	0.509825	0.273767	0.207312	0.139745	0.603326	0.335851	0.221777	0.436232	0.416457	0.368409	0.40448	0.214746	0.162287	0.110972	0.221387	0.284929	0.227824	0.215528	0.170177	0.484965	0.145486	0.468475	0.400044	0.26856	0.231526
Granulocytes_CD54	0.0315651	Granulocytes	CD54	0.0752396	0.416457	0.54779	0.216505	1.96347	0.48996	0.321816	0.405404	0.394118	0.340578	0.360538	0.43532	0.453676	0.405773	0.713185	0.430206	0.145288	0.03909	0.521797	0.165444	0.234446	0.544667	0.258898	0.449327	0.430572	1.04133	0.208486	0.569854	0.449146	1.40778	0.452952
Granulocytes_CD86	0.381002	Granulocytes	CD86	0.381002	2.23797	2.68831	2.13924	2.19792	1.55785	2.05036	1.81172	2.13084	2.00571	1.97298	1.94412	1.68568	2.01251	1.80162	2.48852	1.55308	0.764518	1.45414	1.29043	1.4583	1.88777	1.16079	1.09817	1.15679	1.76932	1.32252	1.82657	2.13954	1.37247	1.49006
Monocytes_CD31/PECAM_1	0.802302	Monocytes	CD31/PECAM_1	0.802302	3.19238	2.90674	2.61392	2.48875	3.05002	3.37522	3.33818	3.116	3.1556	2.59649	2.62053	3.10936	2.64661	3.29527	3.24573	2.66774	2.33991	2.36557	3.01188	2.97492	2.74471	2.88552	2.87316	2.87733	2.68639	2.45822	2.46445	2.97562	2.72979	2.43192
Monocytes_CD36	0.18636	Monocytes	CD36	0.328926	3.86633	3.22296	3.15345	3.36622	4.4075	4.26798	4.62151	3.9753	3.93627	3.05187	3.15311	4.33869	2.71989	4.24291	4.28661	3.09531	3.28794	3.47602	3.16735	3.30989	3.77826	3.87486	3.60221	3.71617	3.25774	2.86343	3.39777	3.76175	3.21016	2.51531
Monocytes_CD45RA	0.164052	Monocytes	CD45RA	0.328926	0.742787	0.952565	2.91222	0.933425	0.879534	1.01872	0.721699	0.850639	0.631568	0.595901	0.888919	0.566937	1.30497	0.928649	0.709863	0.248727	0.383342	0.419121	0.849338	0.755462	0.482464	0.441151	0.682393	0.61357	0.751531	0.510796	0.47207	0.566938	0.403002	0.333579
Monocytes_CD49d	0.0364521	Monocytes	CD49d	0.218712	2.79469	3.31812	0.614073	3.31065	3.16806	2.69471	2.93951	1.21816	1.79245	2.13679	1.11083	3.04081	2.09772	3.16494	3.33196	1.91506	1.82525	2.13098	1.26174	2.16732	2.5456	2.84478	2.5021	2.98543	2.91426	1.12013	2.40617	3.11936	1.5887	1.62926
Monocytes_CD54	0.219284	Monocytes	CD54	0.328926	2.12828	1.68493	1.63084	3.96369	2.32503	1.4179	2.70969	2.35609	2.31124	1.10726	2.04059	2.08919	2.38819	2.88448	2.40088	1.30361	0.728759	1.35982	1.4448	1.49554	1.60951	2.287	1.92821	2.58516	3.12019	0.922552	0.967458	1.96753	2.28614	1.34898
Monocytes_CD86	0.394508	Monocytes	CD86	0.473409	2.1676	2.17541	1.15472	2.12186	2.15704	2.58739	2.36152	2.0774	1.55458	1.74374	1.61981	1.8996	1.98099	2.168	2.37879	1.16386	1.17158	1.58611	1.33332	1.7596	1.8384	1.38907	1.63547	1.60133	1.56187	1.23684	1.79388	1.95971	1.44453	0.947923
NK T cells_CD28	0.609474	NK T cells	CD28	0.945727	0.0599641	0.866732	0.584369	0.370467	0.116933	0.484429	1.82544	0.31343	0.0249974	0.169192	0.354992	0.256161	2.86788	0.111767	1.84702	0.00919987	0.731887	2.724	0.0575682	0.55122	0.44388	0	0.310677	0.351609	0	0	1.75856	0.313442	2.51476	0.71096
NK T cells_CD31/PECAM_1	0.91645	NK T cells	CD31/PECAM_1	0.978049	0.245137	0.439695	0.257156	0.161102	0.0751293	0.343788	0.756539	0.794602	0.109183	0.198298	0.179632	1.04564	0.739059	0.649222	0.672055	0.0467829	0.379803	0.548483	0.0241976	0.663797	0.331306	0	0.38455	0.765347	0.145981	0	0.282622	0.16357	0.542842	0.436574
NK T cells_CD45RA	0.663603	NK T cells	CD45RA	0.945727	2.83659	1.60713	3.9397	3.33001	3.52513	2.61196	1.51046	1.97648	3.49746	2.98822	3.25569	5.08359	0.916291	4.10535	1.14459	1.48369	2.3713	0.61792	3.42845	3.18484	1.04759	3.27759	2.46777	2.26374	3.61171	2.87436	0.335851	0.985529	0.671357	0.529198
NK T cells_CD45RO	0.978049	NK T cells	CD45RO	0.978049	0.76727	1.3893	0.445333	1.10404	0.606355	0.45114	1.78673	1.25896	0.41241	0.616415	1.07942	0.999149	3.0119	0.83845	1.8114	0.495121	0.852949	2.16769	0.564189	0.933965	1.0193	0.223534	0.780685	1.21297	0.62034	0.450596	1.81743	0.778686	2.71373	3.12263
NK T cells_CD49d	0.140535	NK T cells	CD49d	0.945727	2.28327	2.52455	1.25638	1.88498	2.25209	1.92533	1.52194	2.15034	1.7636	2.34132	2.51362	2.16558	1.16591	2.06269	0.926871	2.67001	1.63596	1.26122	1.99262	1.93993	1.90019	2.08931	1.22466	1.97239	2.32696	2.32611	1.55129	2.59371	1.85028	2.00868
NK T cells_CD54	0.44336	NK T cells	CD54	0.945727	0.423066	0.828068	0.134593	1.24069	0.200847	0.198494	0.341522	0.483176	0.0501789	0.341522	0.389849	0.351382	0.762067	0.516172	0.518635	0.246108	0	0.238532	0.367848	0.40193	0.315347	0.0841008	0.285494	0.272224	0.53623	0.31268	0.228701	0.574902	0.639253	0.362552
NK T cells_CD69	0.709296	NK T cells	CD69	0.945727	1.04847	0.819532	0.834803	1.37056	0.189268	0.629411	1.03693	1.20878	0.329789	1.53247	1.83791	0.361385	2.10032	1.39043	0.146278	0.31001	0.270875	1.93669	0.159523	0.282621	0.0343932	0.135386	0.105028	0.396042	2.29858	0.398379	0.113456	0.156955	0.550078	0.639104
NK T cells_CD86	0.428824	NK T cells	CD86	0.945727	1.37247	1.7598	0.821007	1.4414	0.983435	1.22229	0.785948	1.24624	1.10069	1.24186	1.44273	0.711675	1.51918	0.945495	1.40718	0.879251	0.430024	0.673351	0.757154	0.847511	0.856407	0.294523	0.44877	0.576351	1.04277	0.789265	1.27374	1.33651	0.82674	0.644929
NK T cells_FoxP3	0.791681	NK T cells	FoxP3	0.950017	0.596239	1.55744	0.732512	1.33823	0.487286	0.912008	0.738436	0.493333	0.274153	0.301033	0.864725	0.712547	1.65662	1.34635	0.810353	0.395044	1.11569	0.240864	0.555575	0.919618	0.413514	0.00599996	0.218532	0.329126	0.161398	0.497786	0.191723	0.937913	1.21107	1.32963
NK T cells_PD1	0.242116	NK T cells	PD1	0.945727	0.0155994	0.0727358	0	0.0357924	0	0	0.930425	1.6076	0	0.0755282	0.0840011	0.0658445	1.66089	0	0.989589	0	0	0.471352	0.314204	0	0.416457	0	0.0436838	0.231721	2.07636	0	0.285217	0.026197	0.639145	0.415215
NK T cells_PDL1	0.440019	NK T cells	PDL1	0.945727	1.40107	1.75134	1.37684	1.54258	1.07503	1.38705	0.814209	1.33331	1.09733	1.24505	1.29995	0.763791	1.53222	0.953572	1.42687	0.963067	0.442789	0.821892	0.796927	0.811586	0.876841	0.406511	0.957433	0.526179	1.18842	0.999092	1.43762	1.39888	0.924953	0.749766
NK T cells_Tbet	0.473378	NK T cells	Tbet	0.945727	2.21368	0.656104	0.682393	2.30239	2.74144	1.731	1.05046	1.37993	2.21868	1.76467	1.19059	1.61701	0.578064	1.47746	0.0910741	0.29912	0.0165992	0.298545	1.19521	0.198002	0.942386	2.1612	1.38031	2.12256	1.73624	1.64135	0.515291	0.13152	0.364245	0.121401
NK cells_CD31/PECAM_1	0.026888	NK cells	CD31/PECAM_1	0.241992	0.278198	0.469464	0.126264	0.230747	0.208291	0.325046	0.38762	0.128843	0.1613	0.199474	0.263539	0.900337	0.247369	0.237365	0.259092	0.157943	0.0714392	0.150036	0	0.0267968	0.1062	0.125867	0.0671495	0.719653	0	0	0.183076	0.207605	0.211617	0.160016
NK cells_CD31/PECAM_1	0.026888	NK cells	CD31/PECAM_1	0.241992	0.278198	0.469464	0.126264	0.230747	0.208291	0.325046	0.38762	0.128843	0.1613	0.199474	0.263539	0.900337	0.247369	0.237365	0.259092	0.157943	0.0714392	0.150036	0	0.0267968	0.1062	0.125867	0.0671495	0.719653	0	0	0.183076	0.207605	0.211617	0.160016
NK cells_CD45RA	0.415863	NK cells	CD45RA	0.542923	2.85587	2.69812	3.80615	2.85747	3.57239	2.94586	3.39251	2.90266	3.87301	3.06862	4.02337	4.48582	3.28461	3.40188	1.40172	1.34411	2.59361	2.2869	3.28937	2.68704	1.79724	3.3609	2.8596	2.54272	3.22011	2.82803	0.45268	0.910208	2.69304	1.6924
NK cells_CD45RA	0.415863	NK cells	CD45RA	0.542923	2.85587	2.69812	3.80615	2.85747	3.57239	2.94586	3.39251	2.90266	3.87301	3.06862	4.02337	4.48582	3.28461	3.40188	1.40172	1.34411	2.59361	2.2869	3.28937	2.68704	1.79724	3.3609	2.8596	2.54272	3.22011	2.82803	0.45268	0.910208	2.69304	1.6924
NK cells_CD45RO	0.0695348	NK cells	CD45RO	0.312906	0.753151	0.997859	0.351798	0.872578	0.592517	0.614742	0.628581	0.580026	0.440514	0.608791	0.80738	0.600124	0.720912	0.677878	0.805146	0.491029	0.291072	0.50346	0.325426	0.413698	0.497608	0.19349	0.298928	0.31001	0.529857	0.429201	0.688741	0.689383	0.53405	0.510531
NK cells_CD45RO	0.0695348	NK cells	CD45RO	0.312906	0.753151	0.997859	0.351798	0.872578	0.592517	0.614742	0.628581	0.580026	0.440514	0.608791	0.80738	0.600124	0.720912	0.677878	0.805146	0.491029	0.291072	0.50346	0.325426	0.413698	0.497608	0.19349	0.298928	0.31001	0.529857	0.429201	0.688741	0.689383	0.53405	0.510531
NK cells_CD49d	0.124098	NK cells	CD49d	0.372293	2.12765	3.08797	1.64418	1.93327	2.10734	1.96016	2.25711	1.80761	1.48473	2.21193	2.03701	2.27968	2.04643	2.35074	2.08168	2.26417	1.95306	2.1812	1.63791	1.81857	2.12718	1.86614	1.64623	1.77375	2.49629	2.14387	1.99037	2.48508	2.10269	1.8694
NK cells_CD49d	0.124098	NK cells	CD49d	0.372293	2.12765	3.08797	1.64418	1.93327	2.10734	1.96016	2.25711	1.80761	1.48473	2.21193	2.03701	2.27968	2.04643	2.35074	2.08168	2.26417	1.95306	2.1812	1.63791	1.81857	2.12718	1.86614	1.64623	1.77375	2.49629	2.14387	1.99037	2.48508	2.10269	1.8694
NK cells_CD54	0.264269	NK cells	CD54	0.489006	0.604168	1.245	0.200063	1.49605	0.313252	0.282046	0.500448	0.343033	0.118224	0.424166	0.874711	1.00621	1.01738	0.309438	0.565392	0.362602	0.041588	0.450778	0.378498	0.256382	0.359975	0.127851	0.187794	0.259865	0.605009	0.341144	0.308007	0.434499	0.679814	0.402818
NK cells_CD54	0.264269	NK cells	CD54	0.489006	0.604168	1.245	0.200063	1.49605	0.313252	0.282046	0.500448	0.343033	0.118224	0.424166	0.874711	1.00621	1.01738	0.309438	0.565392	0.362602	0.041588	0.450778	0.378498	0.256382	0.359975	0.127851	0.187794	0.259865	0.605009	0.341144	0.308007	0.434499	0.679814	0.402818
NK cells_CD69	0.27167	NK cells	CD69	0.489006	1.0368	0.76956	0.383993	2.22528	0.35114	0.550388	0.648401	1.46138	0.347937	1.5009	1.81159	2.40638	0.681829	0.899221	0.290113	0.256576	0.479959	0.495654	0.0201986	0.204766	0	0.160312	0.0790177	0.538408	1.96898	0.460546	0	0	0.307911	0.176679
NK cells_CD69	0.27167	NK cells	CD69	0.489006	1.0368	0.76956	0.383993	2.22528	0.35114	0.550388	0.648401	1.46138	0.347937	1.5009	1.81159	2.40638	0.681829	0.899221	0.290113	0.256576	0.479959	0.495654	0.0201986	0.204766	0	0.160312	0.0790177	0.538408	1.96898	0.460546	0	0	0.307911	0.176679
NK cells_CD86	0.482598	NK cells	CD86	0.542923	1.3653	2.04594	1.08889	1.44099	1.03023	1.41501	1.05792	1.43493	1.14059	1.23796	1.40986	0.729072	1.45706	1.03504	1.82116	0.908822	0.440969	0.951154	0.749755	1.02045	1.03441	0.327324	0.708595	0.47566	1.12042	0.876841	1.38148	1.36463	0.92413	0.763063
NK cells_CD86	0.482598	NK cells	CD86	0.542923	1.3653	2.04594	1.08889	1.44099	1.03023	1.41501	1.05792	1.43493	1.14059	1.23796	1.40986	0.729072	1.45706	1.03504	1.82116	0.908822	0.440969	0.951154	0.749755	1.02045	1.03441	0.327324	0.708595	0.47566	1.12042	0.876841	1.38148	1.36463	0.92413	0.763063
NK cells_PDL1	0.475701	NK cells	PDL1	0.542923	1.41161	2.0162	1.13151	1.49997	1.06027	1.42488	1.06386	1.45485	1.09853	1.25327	1.29482	0.708912	1.43299	1.07381	1.81908	0.988021	0.545188	1.05817	0.846153	1.06126	1.12066	0.442607	0.812431	0.555057	1.29186	1.00414	1.49869	1.46125	1.02172	0.819384
NK cells_PDL1	0.475701	NK cells	PDL1	0.542923	1.41161	2.0162	1.13151	1.49997	1.06027	1.42488	1.06386	1.45485	1.09853	1.25327	1.29482	0.708912	1.43299	1.07381	1.81908	0.988021	0.545188	1.05817	0.846153	1.06126	1.12066	0.442607	0.812431	0.555057	1.29186	1.00414	1.49869	1.46125	1.02172	0.819384
NK cells_Tbet	0.595809	NK cells	Tbet	0.595809	1.76832	0.67933	0.970702	2.98237	2.65613	1.51256	2.38085	1.87945	2.1413	1.40658	0.652503	1.55348	1.13017	2.00603	0.370654	0.140933	0.612565	0.949674	1.24079	0.476556	0.991417	1.9537	1.03061	2.40752	1.92662	1.53733	0.378777	0.0215983	0.42728	0
NK cells_Tbet	0.595809	NK cells	Tbet	0.595809	1.76832	0.67933	0.970702	2.98237	2.65613	1.51256	2.38085	1.87945	2.1413	1.40658	0.652503	1.55348	1.13017	2.00603	0.370654	0.140933	0.612565	0.949674	1.24079	0.476556	0.991417	1.9537	1.03061	2.40752	1.92662	1.53733	0.378777	0.0215983	0.42728	0
gd T cells_CD28	0.105365	gd T cells	CD28	0.396327	1.82305	0.259091	0.0942604	0.690577	0.103018	0.533988	0.326375	0.256188	0	0.070741	0.12428	0.0026	1.93957	0.0741321	1.68482	0.0140995	0.392305	0.0431866	0	0.492483	0.0928665	0	0.060163	0.428926	0	0.017999	0.243487	0.205647	1.00724	0.385203
gd T cells_CD31/PECAM_1	0.512569	gd T cells	CD31/PECAM_1	0.651562	0.481748	1.03239	0.128447	0.288674	0.15893	0.40688	0.496188	0.598098	0.372056	0.136476	0.476377	0.374952	0.9127	1.06324	0.301989	0.430663	0.445584	0.202611	0.484965	0.29249	0.534224	0	0.0241976	0.410015	0.577552	0.246884	0.416824	1.23077	0.537885	0.294523
gd T cells_CD45RA	0.920276	gd T cells	CD45RA	0.920276	1.58493	3.31017	4.38338	2.38018	4.1839	3.12871	1.28756	3.21648	4.61405	2.48533	4.70732	4.54906	1.1569	4.94794	0.707009	2.48406	1.45662	1.26509	4.08832	1.1878	3.15624	2.24296	3.07358	1.69197	4.44298	4.47495	0.589889	1.35214	1.31051	1.6589
gd T cells_CD45RO	0.301799	gd T cells	CD45RO	0.553298	1.94025	0.872222	0.104211	1.37886	0.665562	0.912976	1.50683	0.98985	0.352363	0.719181	0.618337	0.518986	2.5972	0.559714	3.09317	0.427737	1.2063	0.877125	0.235419	1.14187	0.468295	0.345863	0.678503	1.16545	0.489782	0.34624	0.624423	0.663121	2.09974	0.808123
gd T cells_CD49d	0.0143014	gd T cells	CD49d	0.157316	2.28457	3.11619	1.83837	2.03268	2.53298	2.12008	2.47367	2.06119	2.20954	2.55155	2.63617	2.96414	2.11693	2.58797	0.688661	2.54712	2.30668	2.33171	2.12783	2.26556	2.35691	2.21158	2.09498	2.18773	1.8054	2.42485	2.33409	3.00138	2.36774	2.2503
gd T cells_CD54	0.108089	gd T cells	CD54	0.396327	0.449871	1.11954	0	1.83601	0.51758	0.251197	0.368222	0.571909	0.149048	0.380921	0.544494	0.694587	0.550388	0.746972	0.596408	0.86165	0.175104	0.133007	0.789265	0.172715	0.549522	0.274346	0.267112	0.392634	1.4904	0.699535	0.637197	0.811392	1.43592	0.202415
gd T cells_CD69	0.271531	gd T cells	CD69	0.553298	1.30335	1.61515	0.438237	2.35582	0.441879	0.76597	0.628083	1.04609	0.631817	0.747127	2.96596	1.13519	1.05171	2.15212	0.0835029	0.599111	0.288768	0.371776	0.201435	0.0426861	0.0589658	0.0601637	0.365038	0.318774	2.80163	0.881798	0.0601636	0.578063	0.544146	0.0317946
gd T cells_CD86	0.533096	gd T cells	CD86	0.651562	1.28335	1.88904	1.04045	1.21784	0.783834	1.07711	0.790169	1.18998	1.05823	1.17784	1.26958	0.693147	1.40469	0.865159	1.35044	0.799996	0.19102	0.772456	0.658146	0.893606	0.808421	0.274249	0.538843	0.229773	0.964	0.722485	1.24069	1.31232	0.744649	0.923445
gd T cells_FoxP3	0.915266	gd T cells	FoxP3	0.920276	0.816133	1.76084	0.319344	1.63253	0.567281	1.18976	0.657902	1.00362	0.395415	0.593955	0.906463	0.710813	1.28787	1.37161	0.770628	0.377938	1.52062	0.281469	0.675616	0.933775	0.607867	0.0534745	0.265172	0.221973	0.410568	0.889412	0.266146	1.08859	1.30416	0.565048
gd T cells_PD1	0.428073	gd T cells	PD1	0.651562	1.25827	1.92756	1.17688	2.15991	1.40829	0.819753	0.0585665	1.81217	0.728758	0.495832	1.86847	0	3.00317	0	0.766048	0.955047	0.272043	0.175498	0.27444	0.306545	0.737658	0	0	0.546923	2.54914	0.128248	0.715542	2.95729	1.1972	1.34966
gd T cells_Tbet	0.205859	gd T cells	Tbet	0.553298	1.06952	0.641654	0.619423	1.568	2.16936	0.579268	1.61074	0.821597	1.86696	1.36223	1.34947	1.42433	0.487642	1.48179	0.223924	0.203884	0.223322	0.92509	0.701765	0.248435	0.889412	1.82444	0.795802	1.58627	0.941032	0.82307	0.210541	0	0.323716	0.0886837
Blood general populations; ADvsCon	p_val	cluster_id	marker_id	p_adj	control01	ms06	ad08	ms07	ms12	ad06	ms05	control05	ms01	control03	ms02	ms11	ad05	control10	ad07	control08	control02	control06	ad04	ad01	control07	ad02	ms04	ms10	control09	ad03	ms08	ms09	ms03	control11
B cell lineage_CD31/PECAM_1	0.954863	B cell lineage	CD31/PECAM_1	0.954863	0.726252	0.580622	0.49876	0.621758	0.650207	0.668	0.995455	0.341333	0.355655	0.624673	0.439695	0.315538	0.389664	0.793627	0.44969	0.225581	0.0657526	0.364664	0.415354	0.382411	0.267498	0.375699	0.302371	0.676909	0.212693	0.263152	0.360726	0.453133	0.371309	0.293182
B cell lineage_CD45RA	0.705363	B cell lineage	CD45RA	0.940485	3.96442	3.22335	4.75373	3.9384	4.96229	4.09549	4.34132	3.92438	4.52882	3.90798	4.48296	4.49581	3.54008	4.44864	2.41401	2.38943	3.12247	3.98551	3.56668	3.21995	2.54695	4.21728	3.74974	4.50484	3.18783	3.79906	0.921934	2.1397	3.58454	3.05496
B cell lineage_CD45RO	0.407907	B cell lineage	CD45RO	0.815814	0.855759	0.973158	0.45113	0.759612	0.574476	0.703515	0.56565	0.727193	0.562297	0.645031	0.623924	0.570196	0.715712	0.745501	0.798425	0.641571	0.27685	0.462982	0.45431	0.544841	0.530206	0.222753	0.355279	0.283392	0.680539	0.385482	0.798574	0.831732	0.685121	0.530556
B cell lineage_CD49d	0.224709	B cell lineage	CD49d	0.599223	2.36884	2.91516	2.04743	2.72669	2.90214	2.17547	2.5458	2.94197	2.43216	1.99724	2.18826	2.71355	2.31318	2.79842	2.56008	2.51338	2.11465	2.83991	2.29687	2.53522	2.36118	2.57039	1.84585	2.41138	2.91804	2.45773	2.57042	2.91594	2.43769	2.20339
B cell lineage_CD54	0.0340106	B cell lineage	CD54	0.272085	0.900686	1.28417	0.747042	1.634	0.839761	0.812134	0.737269	1.50539	0.784287	0.648152	0.636866	0.806189	0.652011	1.3303	1.22088	1.27238	0.173134	1.46191	0.781565	0.562297	0.955651	0.672379	0.337364	0.959063	1.55014	0.786853	0.797826	1.0625	2.05576	0.803804
B cell lineage_CD86	0.931544	B cell lineage	CD86	0.954863	1.24009	1.81293	0.898045	1.24606	0.716028	1.3088	0.735789	1.6145	1.02783	1.0713	1.15839	0.720047	1.45396	0.90215	1.5456	0.988674	0.423433	0.727741	0.711999	0.957726	0.989197	0.211421	0.620257	0.260446	1.19459	0.686092	1.43438	1.40422	0.977647	0.728759
B cell lineage_FoxP3	0.602059	B cell lineage	FoxP3	0.940485	2.48771	2.95881	2.29011	2.31075	1.68726	2.44371	1.55522	2.10921	2.09602	1.74512	1.64671	1.67943	2.31028	2.87414	1.75235	2.16942	2.17336	0.999351	1.89464	0.736879	2.06454	1.07111	0.403926	0.954645	1.59105	2.21303	1.80898	2.28016	2.52194	1.86424
B cell lineage_Tbet	0.132772	B cell lineage	Tbet	0.531087	0.0399893	0.113158	0	0.132809	0.0024	0	0	0.215723	0.505053	0	0	0.175596	0.0127996	0.0175991	0.344731	0	0.041588	0.126859	0.0707407	0	0.26663	0	0	0	1.28453	0.0586663	0	0.260059	0	0
CD4+ T cells_CD25 (IL_2R)	0.278553	CD4+ T cells	CD25 (IL_2R)	0.724238	0	0.0917711	0.16426	0.080214	0	0.544754	0.0690451	0.15063	0	0.106399	0.407434	0	0.133404	0	0.262959	0	0.551426	0.156362	0	0.0322944	0	0	0.322196	0.0451846	0	0	0	0	0.145387	0
CD4+ T cells_CD28	0.545214	CD4+ T cells	CD28	0.779314	2.80501	2.68059	1.97828	2.78934	1.10225	2.69298	2.4159	2.6955	0.101625	2.55434	2.71405	2.21493	2.63253	1.90707	2.52213	2.26108	2.60631	2.91652	1.09131	2.70673	2.32478	2.13863	3.05502	2.62294	0.136773	2.37179	2.85148	1.89802	2.91538	2.54404
CD4+ T cells_CD31/PECAM_1	0.858093	CD4+ T cells	CD31/PECAM_1	0.858093	0.382039	0.383621	0.193785	0.329789	0.366912	0.363164	0.490316	0.218946	0.181994	0.288578	0.272225	0.371589	0.28685	0.473148	0.27049	0.179534	0.158733	0.184157	0.167614	0.155769	0.183567	0.285313	0.117331	0.380548	0.102122	0.116139	0.149146	0.197906	0.275791	0.187303
CD4+ T cells_CD45RA	0.604939	CD4+ T cells	CD45RA	0.779314	1.35654	1.1744	4.57167	0.877337	1.1549	1.70767	2.35285	0.364476	0.753459	0.755846	3.29641	0.829681	0.925159	2.4331	0.840925	0.394209	1.14823	0.671569	0.584028	1.26059	0.23999	0.801714	0.224899	1.56532	0.289538	0.641819	0.339349	0.491563	1.39338	0.845573
CD4+ T cells_CD45RO	0.461351	CD4+ T cells	CD45RO	0.779314	1.70176	2.60757	0.671731	3.23512	2.39814	1.51897	1.27845	3.38604	2.59542	3.22602	1.16147	2.91425	2.79864	1.28407	2.14461	3.01475	1.58768	1.6924	2.29043	1.27581	2.50287	1.73313	2.71458	1.29615	3.55373	2.69188	2.00298	2.81605	1.48692	2.04793
CD4+ T cells_CD49d	0.248673	CD4+ T cells	CD49d	0.724238	1.5384	2.31169	1.27716	1.29293	2.96111	2.17433	0.814801	1.64753	2.98746	0.783456	0.835387	2.01125	1.57557	2.91861	1.05283	2.78211	1.70002	2.37739	2.92227	1.4963	2.5651	1.99107	2.14991	1.09348	2.87154	2.43873	1.63468	2.91061	1.1203	2.00014
CD4+ T cells_CD54	0.640351	CD4+ T cells	CD54	0.779314	0.0129996	0.315062	0	0.593617	0.103416	0.0263969	0	0.171065	0.0609622	0.0675486	0.128248	0	0.206529	0.188482	0.109978	0.18858	0	0.0259971	0.0319945	0	0.0529752	0	0	0	0.278486	0.12031	0.0704417	0.194374	0.24863	0.0101998
CD4+ T cells_CD69	0.237779	CD4+ T cells	CD69	0.724238	0.566594	0.431669	0.228019	0.874782	0.239504	0.329789	0.320295	0.375512	0.210639	0.546489	0.500448	0.284737	0.489069	0.500625	0.175498	0.362039	0.183174	0.196532	0.183764	0.0574683	0.0239977	0.0433864	0.0207985	0.00819991	0.949607	0.172543	0	0	0.0733343	0.126264
CD4+ T cells_CD86	0.719366	CD4+ T cells	CD86	0.779314	1.06989	1.81572	0.854967	1.24686	0.631402	0.974612	0.63364	1.16136	0.898243	1.06976	1.11036	0.547616	1.42437	0.688822	1.35005	0.723899	0.250764	0.604505	0.598267	0.752302	0.77603	0.113158	0.588107	0.138952	0.9642	0.57994	1.30366	1.20998	0.642808	0.6667
CD4+ T cells_FoxP3	0.466861	CD4+ T cells	FoxP3	0.779314	2.00433	2.24321	1.31001	2.11622	0.94927	1.84069	1.46481	1.80898	0.510355	0.962468	1.75726	1.17609	1.9577	1.80495	1.17361	1.04484	1.90861	0.63306	0.794678	1.40172	0.72915	0.496543	0.525831	0.841071	0.271936	1.16773	0.8801	1.47746	1.54442	1.45547
CD4+ T cells_Gata3	0.710612	CD4+ T cells	Gata3	0.779314	0.0837022	0.00699994	0	0.0695439	0.0477818	0	0.0406888	0.11743	0	0.0200986	0	0.0169992	0.0367917	0	0	0	0	0	0	0	0	0	0	0	0	0	0	0	0	0
CD4+ T cells_PD1	0.178961	CD4+ T cells	PD1	0.724238	0.242613	0.478437	0.00759993	0.622758	0.572252	0.158535	0.259575	1.00166	0.196532	0.525217	0.230162	0.574134	0.859857	0.535096	0.16998	1.75749	0.143111	0.965198	1.51542	0.062659	1.5664	0.460546	0.146278	0.189857	2.58313	1.61282	0.160214	0.760533	0.190741	0.306384
CD4+ T cells_Tbet	0.268841	CD4+ T cells	Tbet	0.724238	0.0427869	0.104311	0	0.245429	1.3309	0	0	0.12676	1.48456	0.0981424	0	0.245332	0.138061	0.673189	0	0.0781205	0	0	0.356031	0	0.441788	0.245137	0	0	1.36199	0.369719	0	0	0	0
CD8+ T cells_CD28	0.39413	CD8+ T cells	CD28	0.917526	1.74017	0.940761	0.577552	0.292223	0.3596	1.55437	1.76902	0.523727	0.0223981	0.175301	0.939812	0.125272	2.75095	0.178255	1.93233	0.715869	1.8743	2.24587	0	0.145288	0.581985	0	0.500713	0.941167	0	0.267981	2.00809	0.483804	1.82927	0.136377
CD8+ T cells_CD31/PECAM_1	0.652461	CD8+ T cells	CD31/PECAM_1	0.917526	1.04359	0.824689	0.636701	0.354903	0.413146	0.800967	1.22667	0.641489	0.83261	0.136575	0.469464	0.715712	0.682715	0.657085	0.515291	0.31449	0.600461	0.586579	0.0519766	1.07399	0.54883	0.539974	0.375512	1.04897	0.54154	0.330927	0.443334	0.774738	0.725782	0.107095
CD8+ T cells_CD45RA	0.87739	CD8+ T cells	CD45RA	0.917526	0.707485	1.47972	4.58492	3.07794	1.46507	1.97882	3.73898	0.790094	4.51288	1.12125	1.28082	2.2865	0.795878	4.08051	0.772761	0.730871	0.291648	0.742011	2.9295	3.03961	0.602821	2.32843	1.58647	3.54704	3.55205	1.09877	0.269718	0.828215	1.37632	1.69129
CD8+ T cells_CD45RO	0.789986	CD8+ T cells	CD45RO	0.917526	3.24257	1.66834	0.622425	1.03226	1.93018	1.23212	1.0439	2.57664	0.690425	1.82871	1.83164	1.28551	2.98226	0.650535	2.26001	1.57271	2.92193	1.81807	0.598436	0.584113	1.5694	0.756231	1.08847	0.804773	0.830487	2.06019	2.13196	1.60543	2.53634	0.732434
CD8+ T cells_CD49d	0.134955	CD8+ T cells	CD49d	0.917526	2.13304	2.76485	1.48024	2.16615	3.09946	2.53812	1.3503	2.7346	2.47887	2.73228	1.84748	3.30072	1.11155	2.61161	1.2103	2.71483	1.96726	1.75793	2.63976	2.21786	2.55454	2.40387	2.35136	2.15573	2.4642	2.66805	1.50285	3.17679	2.598	2.75989
CD8+ T cells_CD54	0.917526	CD8+ T cells	CD54	0.917526	0.227239	0.739992	0.271261	1.35296	0.301606	0.125272	0.0833036	0.370748	0.29529	0.222558	0.38511	0.154584	0.638684	0.515115	0.582496	0.456932	0.0427869	0.234836	0.294907	0.531081	0.272996	0.127058	0.14024	0.298163	0.692507	0.295481	0.289538	0.54701	0.874427	0.285409
CD8+ T cells_CD69	0.617951	CD8+ T cells	CD69	0.917526	1.11024	0.896425	0.687538	1.21773	0.617251	0.745423	0.692987	0.800145	0.591839	0.932471	2.12287	0.648073	2.19356	1.12841	0.233278	0.574476	1.06792	1.49537	0.334904	0.618838	0.159918	0.405957	0.374485	0.479243	2.33524	0.472429	0.248436	0.194472	0.545014	0.3596
CD8+ T cells_CD86	0.564972	CD8+ T cells	CD86	0.917526	1.07234	1.80955	1.02833	1.35219	0.673351	1.08101	0.68368	1.12953	0.905768	1.0936	1.22148	0.638354	1.50107	0.776562	1.37751	0.73828	0.239504	0.636205	0.619423	0.782322	0.782776	0.190447	0.570796	0.214257	0.962268	0.61959	1.20217	1.20866	0.827261	0.664342
CD8+ T cells_PD1	0.819731	CD8+ T cells	PD1	0.917526	2.8439	0.463072	0.0177991	0.00439999	0.195159	0.941032	0.0495797	1.79704	0.00759993	0.930152	1.25152	0	2.06718	0	1.7347	0.600714	0.451865	0.854391	0	0.367848	0.854607	0	0.226557	0.141032	0.608035	0.482464	0.690906	0.524429	2.00634	0.111071
CD8+ T cells_Tbet	0.708318	CD8+ T cells	Tbet	0.917526	0.56831	0.48157	0.276465	1.93613	1.7868	0.329979	0.225484	0.894885	1.20712	1.10976	0.873005	1.60071	0.469374	1.28971	0.17727	0.0186989	0.0533747	0.299502	0.838742	0.155473	0.631071	1.56227	0.316966	0.864587	1.34083	0.779293	0.306384	0	0.629909	0
DCs_CD25 (IL_2R)	0.956168	DCs	CD25 (IL_2R)	0.982089	0.0233979	0.0775223	0	0.002	0.292607	0.722642	0.0273966	0	0	0	0.00679995	0.207116	0	0.0215983	0.0231979	0	0	0.323242	0	0	0	0	0	0	0.101227	0	0.0327941	0	0	0.187892
DCs_CD31/PECAM_1	0.415801	DCs	CD31/PECAM_1	0.83643	4.21201	3.81482	3.98709	2.71247	2.99096	1.31643	3.44648	4.0559	4.04996	4.08046	4.13889	2.06234	4.0597	3.66288	3.45221	3.62493	3.7579	1.83146	3.78645	3.46929	2.54269	3.58027	2.48915	3.78948	3.72465	3.64933	3.04416	3.39358	3.7024	1.35857
DCs_CD36	0.57276	DCs	CD36	0.83643	1.94092	1.38158	0.758845	1.20559	0.703515	0.365413	2.38615	1.8553	2.35924	1.18586	0.678039	1.41142	1.37893	2.28352	2.91808	2.23019	1.64329	0.376912	1.53082	1.80713	2.7084	1.2587	1.6564	1.80425	1.04459	0.862725	2.44364	2.7791	0.747823	0.304391
DCs_CD49d	0.300847	DCs	CD49d	0.83643	3.76356	3.76482	3.05843	3.10722	3.26993	2.61476	3.88841	3.55635	3.63615	2.72507	3.47974	3.28455	3.73579	3.70051	4.11958	3.30472	3.2132	2.76031	3.50075	3.59583	3.55227	3.31087	3.45531	3.61656	3.40467	3.27135	3.7683	3.88104	3.03588	1.98534
DCs_CD54	0.563763	DCs	CD54	0.83643	2.59949	2.60277	2.16189	3.81958	1.6909	0.587428	2.96566	1.95142	2.37389	2.46857	3.65288	1.78026	2.2757	2.51447	2.89946	2.33603	1.06731	1.10494	1.85089	1.59698	2.01027	2.40581	1.87322	2.71278	3.59838	2.00613	1.83289	2.17062	2.66457	0.813596
DCs_CD86	0.982089	DCs	CD86	0.982089	2.87075	2.89577	2.0981	2.52088	1.75896	1.38977	2.22416	2.58513	2.15651	2.73264	2.23425	1.38413	2.56331	1.98607	2.5395	1.93867	1.78334	1.29843	1.69446	1.7185	1.90045	1.55623	1.73327	1.69318	2.24016	1.84705	2.21979	1.99738	1.94177	0.984412
DCs_PDL1	0.59745	DCs	PDL1	0.83643	1.48425	2.18213	1.08865	2.62045	1.056	1.33213	1.15013	1.78448	1.2608	1.54951	1.33971	0.833049	1.9048	1.14505	1.91188	1.13356	0.577637	0.948934	0.976988	1.67154	1.40848	0.487999	1.21162	0.616583	1.56692	1.13978	1.81845	1.67263	1.10189	0.764824
Granulocytes_CD31/PECAM_1	0.304597	Granulocytes	CD31/PECAM_1	0.492704	1.47946	1.97839	0.738125	1.19975	1.76134	1.23769	1.6522	0.979755	0.856839	0.909793	1.30386	1.39725	1.20647	1.65574	1.54878	1.0102	0.905629	1.20305	0.855111	0.91007	1.33134	1.38148	0.900616	1.5206	1.24495	0.841652	1.42169	1.08052	1.06188	1.06398
Granulocytes_CD49d	0.369528	Granulocytes	CD49d	0.492704	0.302754	0.492275	0.126066	0.432947	0.303136	0.509825	0.273767	0.207312	0.139745	0.603326	0.335851	0.221777	0.436232	0.416457	0.368409	0.40448	0.214746	0.162287	0.110972	0.221387	0.284929	0.227824	0.215528	0.170177	0.484965	0.145486	0.468475	0.400044	0.26856	0.231526
Granulocytes_CD54	0.192539	Granulocytes	CD54	0.492704	0.416457	0.54779	0.216505	1.96347	0.48996	0.321816	0.405404	0.394118	0.340578	0.360538	0.43532	0.453676	0.405773	0.713185	0.430206	0.145288	0.03909	0.521797	0.165444	0.234446	0.544667	0.258898	0.449327	0.430572	1.04133	0.208486	0.569854	0.449146	1.40778	0.452952
Granulocytes_CD86	0.80145	Granulocytes	CD86	0.80145	2.23797	2.68831	2.13924	2.19792	1.55785	2.05036	1.81172	2.13084	2.00571	1.97298	1.94412	1.68568	2.01251	1.80162	2.48852	1.55308	0.764518	1.45414	1.29043	1.4583	1.88777	1.16079	1.09817	1.15679	1.76932	1.32252	1.82657	2.13954	1.37247	1.49006
Monocytes_CD31/PECAM_1	0.501409	Monocytes	CD31/PECAM_1	0.652556	3.19238	2.90674	2.61392	2.48875	3.05002	3.37522	3.33818	3.116	3.1556	2.59649	2.62053	3.10936	2.64661	3.29527	3.24573	2.66774	2.33991	2.36557	3.01188	2.97492	2.74471	2.88552	2.87316	2.87733	2.68639	2.45822	2.46445	2.97562	2.72979	2.43192
Monocytes_CD36	0.54283	Monocytes	CD36	0.652556	3.86633	3.22296	3.15345	3.36622	4.4075	4.26798	4.62151	3.9753	3.93627	3.05187	3.15311	4.33869	2.71989	4.24291	4.28661	3.09531	3.28794	3.47602	3.16735	3.30989	3.77826	3.87486	3.60221	3.71617	3.25774	2.86343	3.39777	3.76175	3.21016	2.51531
Monocytes_CD45RA	0.0381896	Monocytes	CD45RA	0.229138	0.742787	0.952565	2.91222	0.933425	0.879534	1.01872	0.721699	0.850639	0.631568	0.595901	0.888919	0.566937	1.30497	0.928649	0.709863	0.248727	0.383342	0.419121	0.849338	0.755462	0.482464	0.441151	0.682393	0.61357	0.751531	0.510796	0.47207	0.566938	0.403002	0.333579
Monocytes_CD49d	0.302784	Monocytes	CD49d	0.652556	2.79469	3.31812	0.614073	3.31065	3.16806	2.69471	2.93951	1.21816	1.79245	2.13679	1.11083	3.04081	2.09772	3.16494	3.33196	1.91506	1.82525	2.13098	1.26174	2.16732	2.5456	2.84478	2.5021	2.98543	2.91426	1.12013	2.40617	3.11936	1.5887	1.62926
Monocytes_CD54	0.591609	Monocytes	CD54	0.652556	2.12828	1.68493	1.63084	3.96369	2.32503	1.4179	2.70969	2.35609	2.31124	1.10726	2.04059	2.08919	2.38819	2.88448	2.40088	1.30361	0.728759	1.35982	1.4448	1.49554	1.60951	2.287	1.92821	2.58516	3.12019	0.922552	0.967458	1.96753	2.28614	1.34898
Monocytes_CD86	0.652556	Monocytes	CD86	0.652556	2.1676	2.17541	1.15472	2.12186	2.15704	2.58739	2.36152	2.0774	1.55458	1.74374	1.61981	1.8996	1.98099	2.168	2.37879	1.16386	1.17158	1.58611	1.33332	1.7596	1.8384	1.38907	1.63547	1.60133	1.56187	1.23684	1.79388	1.95971	1.44453	0.947923
NK T cells_CD28	0.314759	NK T cells	CD28	0.959926	0.0599641	0.866732	0.584369	0.370467	0.116933	0.484429	1.82544	0.31343	0.0249974	0.169192	0.354992	0.256161	2.86788	0.111767	1.84702	0.00919987	0.731887	2.724	0.0575682	0.55122	0.44388	0	0.310677	0.351609	0	0	1.75856	0.313442	2.51476	0.71096
NK T cells_CD31/PECAM_1	0.959926	NK T cells	CD31/PECAM_1	0.959926	0.245137	0.439695	0.257156	0.161102	0.0751293	0.343788	0.756539	0.794602	0.109183	0.198298	0.179632	1.04564	0.739059	0.649222	0.672055	0.0467829	0.379803	0.548483	0.0241976	0.663797	0.331306	0	0.38455	0.765347	0.145981	0	0.282622	0.16357	0.542842	0.436574
NK T cells_CD45RA	0.723424	NK T cells	CD45RA	0.959926	2.83659	1.60713	3.9397	3.33001	3.52513	2.61196	1.51046	1.97648	3.49746	2.98822	3.25569	5.08359	0.916291	4.10535	1.14459	1.48369	2.3713	0.61792	3.42845	3.18484	1.04759	3.27759	2.46777	2.26374	3.61171	2.87436	0.335851	0.985529	0.671357	0.529198
NK T cells_CD45RO	0.92997	NK T cells	CD45RO	0.959926	0.76727	1.3893	0.445333	1.10404	0.606355	0.45114	1.78673	1.25896	0.41241	0.616415	1.07942	0.999149	3.0119	0.83845	1.8114	0.495121	0.852949	2.16769	0.564189	0.933965	1.0193	0.223534	0.780685	1.21297	0.62034	0.450596	1.81743	0.778686	2.71373	3.12263
NK T cells_CD49d	0.131285	NK T cells	CD49d	0.959926	2.28327	2.52455	1.25638	1.88498	2.25209	1.92533	1.52194	2.15034	1.7636	2.34132	2.51362	2.16558	1.16591	2.06269	0.926871	2.67001	1.63596	1.26122	1.99262	1.93993	1.90019	2.08931	1.22466	1.97239	2.32696	2.32611	1.55129	2.59371	1.85028	2.00868
NK T cells_CD54	0.807868	NK T cells	CD54	0.959926	0.423066	0.828068	0.134593	1.24069	0.200847	0.198494	0.341522	0.483176	0.0501789	0.341522	0.389849	0.351382	0.762067	0.516172	0.518635	0.246108	0	0.238532	0.367848	0.40193	0.315347	0.0841008	0.285494	0.272224	0.53623	0.31268	0.228701	0.574902	0.639253	0.362552
NK T cells_CD69	0.260948	NK T cells	CD69	0.959926	1.04847	0.819532	0.834803	1.37056	0.189268	0.629411	1.03693	1.20878	0.329789	1.53247	1.83791	0.361385	2.10032	1.39043	0.146278	0.31001	0.270875	1.93669	0.159523	0.282621	0.0343932	0.135386	0.105028	0.396042	2.29858	0.398379	0.113456	0.156955	0.550078	0.639104
NK T cells_CD86	0.650226	NK T cells	CD86	0.959926	1.37247	1.7598	0.821007	1.4414	0.983435	1.22229	0.785948	1.24624	1.10069	1.24186	1.44273	0.711675	1.51918	0.945495	1.40718	0.879251	0.430024	0.673351	0.757154	0.847511	0.856407	0.294523	0.44877	0.576351	1.04277	0.789265	1.27374	1.33651	0.82674	0.644929
NK T cells_FoxP3	0.350121	NK T cells	FoxP3	0.959926	0.596239	1.55744	0.732512	1.33823	0.487286	0.912008	0.738436	0.493333	0.274153	0.301033	0.864725	0.712547	1.65662	1.34635	0.810353	0.395044	1.11569	0.240864	0.555575	0.919618	0.413514	0.00599996	0.218532	0.329126	0.161398	0.497786	0.191723	0.937913	1.21107	1.32963
NK T cells_PD1	0.849469	NK T cells	PD1	0.959926	0.0155994	0.0727358	0	0.0357924	0	0	0.930425	1.6076	0	0.0755282	0.0840011	0.0658445	1.66089	0	0.989589	0	0	0.471352	0.314204	0	0.416457	0	0.0436838	0.231721	2.07636	0	0.285217	0.026197	0.639145	0.415215
NK T cells_PDL1	0.565813	NK T cells	PDL1	0.959926	1.40107	1.75134	1.37684	1.54258	1.07503	1.38705	0.814209	1.33331	1.09733	1.24505	1.29995	0.763791	1.53222	0.953572	1.42687	0.963067	0.442789	0.821892	0.796927	0.811586	0.876841	0.406511	0.957433	0.526179	1.18842	0.999092	1.43762	1.39888	0.924953	0.749766
NK T cells_Tbet	0.901332	NK T cells	Tbet	0.959926	2.21368	0.656104	0.682393	2.30239	2.74144	1.731	1.05046	1.37993	2.21868	1.76467	1.19059	1.61701	0.578064	1.47746	0.0910741	0.29912	0.0165992	0.298545	1.19521	0.198002	0.942386	2.1612	1.38031	2.12256	1.73624	1.64135	0.515291	0.13152	0.364245	0.121401
NK cells_CD31/PECAM_1	0.917882	NK cells	CD31/PECAM_1	0.917882	0.278198	0.469464	0.126264	0.230747	0.208291	0.325046	0.38762	0.128843	0.1613	0.199474	0.263539	0.900337	0.247369	0.237365	0.259092	0.157943	0.0714392	0.150036	0	0.0267968	0.1062	0.125867	0.0671495	0.719653	0	0	0.183076	0.207605	0.211617	0.160016
NK cells_CD31/PECAM_1	0.917882	NK cells	CD31/PECAM_1	0.917882	0.278198	0.469464	0.126264	0.230747	0.208291	0.325046	0.38762	0.128843	0.1613	0.199474	0.263539	0.900337	0.247369	0.237365	0.259092	0.157943	0.0714392	0.150036	0	0.0267968	0.1062	0.125867	0.0671495	0.719653	0	0	0.183076	0.207605	0.211617	0.160016
NK cells_CD45RA	0.367099	NK cells	CD45RA	0.917882	2.85587	2.69812	3.80615	2.85747	3.57239	2.94586	3.39251	2.90266	3.87301	3.06862	4.02337	4.48582	3.28461	3.40188	1.40172	1.34411	2.59361	2.2869	3.28937	2.68704	1.79724	3.3609	2.8596	2.54272	3.22011	2.82803	0.45268	0.910208	2.69304	1.6924
NK cells_CD45RA	0.367099	NK cells	CD45RA	0.917882	2.85587	2.69812	3.80615	2.85747	3.57239	2.94586	3.39251	2.90266	3.87301	3.06862	4.02337	4.48582	3.28461	3.40188	1.40172	1.34411	2.59361	2.2869	3.28937	2.68704	1.79724	3.3609	2.8596	2.54272	3.22011	2.82803	0.45268	0.910208	2.69304	1.6924
NK cells_CD45RO	0.576078	NK cells	CD45RO	0.917882	0.753151	0.997859	0.351798	0.872578	0.592517	0.614742	0.628581	0.580026	0.440514	0.608791	0.80738	0.600124	0.720912	0.677878	0.805146	0.491029	0.291072	0.50346	0.325426	0.413698	0.497608	0.19349	0.298928	0.31001	0.529857	0.429201	0.688741	0.689383	0.53405	0.510531
NK cells_CD45RO	0.576078	NK cells	CD45RO	0.917882	0.753151	0.997859	0.351798	0.872578	0.592517	0.614742	0.628581	0.580026	0.440514	0.608791	0.80738	0.600124	0.720912	0.677878	0.805146	0.491029	0.291072	0.50346	0.325426	0.413698	0.497608	0.19349	0.298928	0.31001	0.529857	0.429201	0.688741	0.689383	0.53405	0.510531
NK cells_CD49d	0.111271	NK cells	CD49d	0.917882	2.12765	3.08797	1.64418	1.93327	2.10734	1.96016	2.25711	1.80761	1.48473	2.21193	2.03701	2.27968	2.04643	2.35074	2.08168	2.26417	1.95306	2.1812	1.63791	1.81857	2.12718	1.86614	1.64623	1.77375	2.49629	2.14387	1.99037	2.48508	2.10269	1.8694
NK cells_CD49d	0.111271	NK cells	CD49d	0.917882	2.12765	3.08797	1.64418	1.93327	2.10734	1.96016	2.25711	1.80761	1.48473	2.21193	2.03701	2.27968	2.04643	2.35074	2.08168	2.26417	1.95306	2.1812	1.63791	1.81857	2.12718	1.86614	1.64623	1.77375	2.49629	2.14387	1.99037	2.48508	2.10269	1.8694
NK cells_CD54	0.748596	NK cells	CD54	0.917882	0.604168	1.245	0.200063	1.49605	0.313252	0.282046	0.500448	0.343033	0.118224	0.424166	0.874711	1.00621	1.01738	0.309438	0.565392	0.362602	0.041588	0.450778	0.378498	0.256382	0.359975	0.127851	0.187794	0.259865	0.605009	0.341144	0.308007	0.434499	0.679814	0.402818
NK cells_CD54	0.748596	NK cells	CD54	0.917882	0.604168	1.245	0.200063	1.49605	0.313252	0.282046	0.500448	0.343033	0.118224	0.424166	0.874711	1.00621	1.01738	0.309438	0.565392	0.362602	0.041588	0.450778	0.378498	0.256382	0.359975	0.127851	0.187794	0.259865	0.605009	0.341144	0.308007	0.434499	0.679814	0.402818
NK cells_CD69	0.228967	NK cells	CD69	0.917882	1.0368	0.76956	0.383993	2.22528	0.35114	0.550388	0.648401	1.46138	0.347937	1.5009	1.81159	2.40638	0.681829	0.899221	0.290113	0.256576	0.479959	0.495654	0.0201986	0.204766	0	0.160312	0.0790177	0.538408	1.96898	0.460546	0	0	0.307911	0.176679
NK cells_CD69	0.228967	NK cells	CD69	0.917882	1.0368	0.76956	0.383993	2.22528	0.35114	0.550388	0.648401	1.46138	0.347937	1.5009	1.81159	2.40638	0.681829	0.899221	0.290113	0.256576	0.479959	0.495654	0.0201986	0.204766	0	0.160312	0.0790177	0.538408	1.96898	0.460546	0	0	0.307911	0.176679
NK cells_CD86	0.724815	NK cells	CD86	0.917882	1.3653	2.04594	1.08889	1.44099	1.03023	1.41501	1.05792	1.43493	1.14059	1.23796	1.40986	0.729072	1.45706	1.03504	1.82116	0.908822	0.440969	0.951154	0.749755	1.02045	1.03441	0.327324	0.708595	0.47566	1.12042	0.876841	1.38148	1.36463	0.92413	0.763063
NK cells_CD86	0.724815	NK cells	CD86	0.917882	1.3653	2.04594	1.08889	1.44099	1.03023	1.41501	1.05792	1.43493	1.14059	1.23796	1.40986	0.729072	1.45706	1.03504	1.82116	0.908822	0.440969	0.951154	0.749755	1.02045	1.03441	0.327324	0.708595	0.47566	1.12042	0.876841	1.38148	1.36463	0.92413	0.763063
NK cells_PDL1	0.848977	NK cells	PDL1	0.917882	1.41161	2.0162	1.13151	1.49997	1.06027	1.42488	1.06386	1.45485	1.09853	1.25327	1.29482	0.708912	1.43299	1.07381	1.81908	0.988021	0.545188	1.05817	0.846153	1.06126	1.12066	0.442607	0.812431	0.555057	1.29186	1.00414	1.49869	1.46125	1.02172	0.819384
NK cells_PDL1	0.848977	NK cells	PDL1	0.917882	1.41161	2.0162	1.13151	1.49997	1.06027	1.42488	1.06386	1.45485	1.09853	1.25327	1.29482	0.708912	1.43299	1.07381	1.81908	0.988021	0.545188	1.05817	0.846153	1.06126	1.12066	0.442607	0.812431	0.555057	1.29186	1.00414	1.49869	1.46125	1.02172	0.819384
NK cells_Tbet	0.90253	NK cells	Tbet	0.917882	1.76832	0.67933	0.970702	2.98237	2.65613	1.51256	2.38085	1.87945	2.1413	1.40658	0.652503	1.55348	1.13017	2.00603	0.370654	0.140933	0.612565	0.949674	1.24079	0.476556	0.991417	1.9537	1.03061	2.40752	1.92662	1.53733	0.378777	0.0215983	0.42728	0
NK cells_Tbet	0.90253	NK cells	Tbet	0.917882	1.76832	0.67933	0.970702	2.98237	2.65613	1.51256	2.38085	1.87945	2.1413	1.40658	0.652503	1.55348	1.13017	2.00603	0.370654	0.140933	0.612565	0.949674	1.24079	0.476556	0.991417	1.9537	1.03061	2.40752	1.92662	1.53733	0.378777	0.0215983	0.42728	0
gd T cells_CD28	0.0761774	gd T cells	CD28	0.570822	1.82305	0.259091	0.0942604	0.690577	0.103018	0.533988	0.326375	0.256188	0	0.070741	0.12428	0.0026	1.93957	0.0741321	1.68482	0.0140995	0.392305	0.0431866	0	0.492483	0.0928665	0	0.060163	0.428926	0	0.017999	0.243487	0.205647	1.00724	0.385203
gd T cells_CD31/PECAM_1	0.581677	gd T cells	CD31/PECAM_1	0.710939	0.481748	1.03239	0.128447	0.288674	0.15893	0.40688	0.496188	0.598098	0.372056	0.136476	0.476377	0.374952	0.9127	1.06324	0.301989	0.430663	0.445584	0.202611	0.484965	0.29249	0.534224	0	0.0241976	0.410015	0.577552	0.246884	0.416824	1.23077	0.537885	0.294523
gd T cells_CD45RA	0.469049	gd T cells	CD45RA	0.710939	1.58493	3.31017	4.38338	2.38018	4.1839	3.12871	1.28756	3.21648	4.61405	2.48533	4.70732	4.54906	1.1569	4.94794	0.707009	2.48406	1.45662	1.26509	4.08832	1.1878	3.15624	2.24296	3.07358	1.69197	4.44298	4.47495	0.589889	1.35214	1.31051	1.6589
gd T cells_CD45RO	0.126029	gd T cells	CD45RO	0.570822	1.94025	0.872222	0.104211	1.37886	0.665562	0.912976	1.50683	0.98985	0.352363	0.719181	0.618337	0.518986	2.5972	0.559714	3.09317	0.427737	1.2063	0.877125	0.235419	1.14187	0.468295	0.345863	0.678503	1.16545	0.489782	0.34624	0.624423	0.663121	2.09974	0.808123
gd T cells_CD49d	0.20462	gd T cells	CD49d	0.570822	2.28457	3.11619	1.83837	2.03268	2.53298	2.12008	2.47367	2.06119	2.20954	2.55155	2.63617	2.96414	2.11693	2.58797	0.688661	2.54712	2.30668	2.33171	2.12783	2.26556	2.35691	2.21158	2.09498	2.18773	1.8054	2.42485	2.33409	3.00138	2.36774	2.2503
gd T cells_CD54	0.439849	gd T cells	CD54	0.710939	0.449871	1.11954	0	1.83601	0.51758	0.251197	0.368222	0.571909	0.149048	0.380921	0.544494	0.694587	0.550388	0.746972	0.596408	0.86165	0.175104	0.133007	0.789265	0.172715	0.549522	0.274346	0.267112	0.392634	1.4904	0.699535	0.637197	0.811392	1.43592	0.202415
gd T cells_CD69	0.207572	gd T cells	CD69	0.570822	1.30335	1.61515	0.438237	2.35582	0.441879	0.76597	0.628083	1.04609	0.631817	0.747127	2.96596	1.13519	1.05171	2.15212	0.0835029	0.599111	0.288768	0.371776	0.201435	0.0426861	0.0589658	0.0601637	0.365038	0.318774	2.80163	0.881798	0.0601636	0.578063	0.544146	0.0317946
gd T cells_CD86	0.810863	gd T cells	CD86	0.89195	1.28335	1.88904	1.04045	1.21784	0.783834	1.07711	0.790169	1.18998	1.05823	1.17784	1.26958	0.693147	1.40469	0.865159	1.35044	0.799996	0.19102	0.772456	0.658146	0.893606	0.808421	0.274249	0.538843	0.229773	0.964	0.722485	1.24069	1.31232	0.744649	0.923445
gd T cells_FoxP3	0.472974	gd T cells	FoxP3	0.710939	0.816133	1.76084	0.319344	1.63253	0.567281	1.18976	0.657902	1.00362	0.395415	0.593955	0.906463	0.710813	1.28787	1.37161	0.770628	0.377938	1.52062	0.281469	0.675616	0.933775	0.607867	0.0534745	0.265172	0.221973	0.410568	0.889412	0.266146	1.08859	1.30416	0.565048
gd T cells_PD1	0.995478	gd T cells	PD1	0.995478	1.25827	1.92756	1.17688	2.15991	1.40829	0.819753	0.0585665	1.81217	0.728758	0.495832	1.86847	0	3.00317	0	0.766048	0.955047	0.272043	0.175498	0.27444	0.306545	0.737658	0	0	0.546923	2.54914	0.128248	0.715542	2.95729	1.1972	1.34966
gd T cells_Tbet	0.52081	gd T cells	Tbet	0.710939	1.06952	0.641654	0.619423	1.568	2.16936	0.579268	1.61074	0.821597	1.86696	1.36223	1.34947	1.42433	0.487642	1.48179	0.223924	0.203884	0.223322	0.92509	0.701765	0.248435	0.889412	1.82444	0.795802	1.58627	0.941032	0.82307	0.210541	0	0.323716	0.0886837
Blood zoom NKB; MSvsCon	p_val	cluster_id	marker_id	p_adj	control01	ms06	ad08	ms07	ms12	ad06	ms05	control05	ms01	control03	ms02	ms11	ad05	control10	ad07	control08	control02	control06	ad04	ad01	control07	ad02	ms04	ms10	control09	ad03	ms08	ms09	ms03	control11
B cells_CD31/PECAM_1	0.308942	B cells	CD31/PECAM_1	0.61307	0.756846	0.645771	0.532037	0.621842	0.656758	0.679492	1.00981	0.522675	0.425082	0.641736	0.544839	0.363914	0.450053	0.847022	0.550388	0.292223	0.115145	0.380548	0.527056	0.412594	0.342278	0.412962	0.31449	0.701685	0.421049	0.289346	0.397453	0.503903	0.502043	0.338688
B cells_CD45RA	0.340595	B cells	CD45RA	0.61307	3.96442	3.35358	4.78502	4.03393	4.9881	4.12682	4.34996	3.8072	4.68909	3.90672	4.53758	4.5969	3.64523	4.57985	2.61523	2.41578	3.48784	4.04175	3.68034	3.32005	2.74049	4.28071	3.76956	4.56954	4.00457	4.00661	0.920147	2.18729	3.58019	3.0175
B cells_CD45RO	0.194826	B cells	CD45RO	0.61307	0.829973	0.963867	0.428741	0.77641	0.579599	0.712237	0.561953	0.91684	0.593363	0.650617	0.671804	0.541888	0.725154	0.792274	0.776106	0.646594	0.340483	0.453495	0.444243	0.495299	0.515115	0.215332	0.375979	0.277524	0.618421	0.375699	0.77899	0.830634	0.699376	0.562985
B cells_CD49d	0.863602	B cells	CD49d	0.863602	2.34069	2.86092	2.01726	2.73612	2.92349	2.1582	2.53689	3.35573	2.49667	2.01471	2.35247	2.63671	2.30587	2.86454	2.57941	2.57863	2.23482	2.85925	2.29868	2.53522	2.30867	2.59093	1.88406	2.40831	2.73719	2.46428	2.52232	2.93467	2.61567	2.22877
B cells_CD54	0.771593	B cells	CD54	0.863602	0.879533	1.23061	0.733603	1.61878	0.823365	0.817612	0.731887	1.55926	0.743253	0.664098	0.732433	0.692347	0.686414	1.20954	1.09143	1.26843	0.137863	1.45068	0.722485	0.471531	0.796327	0.637032	0.358849	0.923513	1.32966	0.690585	0.744183	1.01968	2.04853	0.832318
B cells_CD86	0.328887	B cells	CD86	0.61307	1.2326	1.79504	0.862326	1.2834	0.724527	1.31021	0.732824	1.61878	1.01264	1.07056	1.25543	0.696344	1.45006	0.953706	1.49195	1.03352	0.361758	0.711604	0.67246	0.930561	0.92509	0.202807	0.653486	0.254833	1.06361	0.632728	1.41785	1.33346	1.02871	0.768187
B cells_FoxP3	0.00977464	B cells	FoxP3	0.0879717	2.49357	2.94839	2.35418	2.37241	1.71061	2.4632	1.56628	2.63034	2.20129	1.76387	2.02009	1.77335	2.35931	2.9095	1.97502	2.2748	2.25284	0.966794	1.94345	0.551427	2.20726	1.12595	0.429018	0.977779	1.78288	2.27911	1.78725	2.43113	2.58453	1.90048
B cells_PDL1	0.543028	B cells	PDL1	0.698179	1.11255	1.68997	0.861931	1.09348	0.574647	1.20767	0.632563	1.19009	0.869729	0.9614	1.00878	0.567967	1.28797	0.688501	1.3719	0.878967	0.35161	0.734541	0.668565	0.897264	0.898522	0.205941	0.659126	0.272418	1.01917	0.684806	1.49057	1.37812	0.972893	0.83947
B cells_Tbet	0.43473	B cells	Tbet	0.652095	0.0195987	0.0177991	0	0.0423873	0	0	0	0.0641529	0.168994	0	0	0.022998	0	0	0.0221982	0	0	0.0367917	0	0	0.0111998	0	0	0	0.220606	0	0	0.0435862	0	0
NK CD56bright_CD31/PECAM_1	0.00268082	NK CD56bright	CD31/PECAM_1	0.0268082	0.485858	0.664505	0.143903	0.292127	0.299981	0.401709	0.822039	0.142913	0.162484	0.269428	0.270104	1.01168	0.319725	0.160115	0.304665	0.154386	0.0747304	0.127752	0.350855	0.141622	0.111966	0.454853	0.0467829	0.578746	0.192803	0.0653535	0.186713	0.170374	0.172937	0.228604
NK CD56bright_CD45RA	0.988532	NK CD56bright	CD45RA	0.988532	3.39178	2.19866	3.78265	3.62786	4.07178	2.8506	3.89006	3.59208	4.06165	3.26819	3.95719	4.31737	3.20938	4.50409	1.7628	1.36405	2.67838	2.3675	2.80316	2.36431	1.65673	3.50069	3.01988	3.22957	3.20807	3.00134	0.375699	0.945225	2.72394	1.7031
NK CD56bright_CD45RO	0.362316	NK CD56bright	CD45RO	0.724632	0.822187	1.18261	0.379057	1.023	0.653567	0.787457	0.770933	0.519426	0.448511	0.63248	0.783834	0.585814	0.74643	0.669137	0.763599	0.405957	0.218654	0.485858	0.565814	0.490654	0.47207	0.280218	0.348503	0.3956	0.57345	0.421049	0.691684	0.638106	0.558163	0.554711
NK CD56bright_CD49d	0.654911	NK CD56bright	CD49d	0.988532	1.80431	2.76655	1.3812	2.1793	1.79488	2.16619	2.09029	1.86011	1.65249	1.81264	1.41803	2.11973	1.83442	2.15037	1.73607	2.02592	1.90223	2.14784	1.68924	1.69793	1.57358	1.64433	1.97213	1.54707	2.03052	1.96137	2.00027	2.46513	2.12197	1.6756
NK CD56bright_CD54	0.00954695	NK CD56bright	CD54	0.0477347	1.61213	1.46516	0.676101	3.0334	2.04299	1.32142	2.34979	1.77789	0.354056	1.7155	1.27291	1.17118	2.14209	1.18451	2.62936	0.428743	0.138754	1.10607	0.706213	0.284064	1.17502	1.20943	1.61044	2.0267	1.86943	0.335094	0.786703	0.562039	0.762756	0.982253
NK CD56bright_CD69	0.061668	NK CD56bright	CD69	0.20556	1.26812	0.777245	0.391706	2.65379	2.38876	0.476735	2.49185	1.30578	0.42499	1.59262	2.1685	2.75113	0.696903	1.71759	0.124677	0.157547	0.502043	0.702322	0	0	0.0173991	0.772913	0.358097	1.79491	2.13593	0.277235	0	0	0.29299	0.192411
NK CD56bright_CD86	0.733832	NK CD56bright	CD86	0.988532	1.30941	2.03356	0.957057	1.43222	0.795053	1.29584	0.848036	1.20767	1.03668	1.10738	1.39268	0.710417	1.44256	0.870727	1.48834	0.769865	0.326185	0.793627	0.449377	0.9274	0.838013	0.265278	0.59607	0.26856	1.03378	0.722485	1.0519	1.1484	0.835241	0.675454
NK CD56bright_FoxP3	0.187007	NK CD56bright	FoxP3	0.467519	0.939948	1.90035	0.482642	1.8357	0.411028	0.93288	0.865731	0.82557	0.422608	0.573364	1.01469	0.947518	1.94084	1.51357	0.568139	0.317442	1.26237	0.369813	0.74711	0.526181	0.465145	0.0726361	0.306002	0.0643556	0.388178	0.609379	0.104708	0.687056	0.49521	0.590992
NK CD56bright_PDL1	0.835664	NK CD56bright	PDL1	0.988532	1.32996	2.01087	0.891519	1.47633	0.780051	1.17372	0.784589	1.20283	1.04315	1.07894	1.27757	0.673189	1.40353	0.818499	1.47381	0.853814	0.449509	0.952431	0.593776	0.871507	0.923856	0.362602	0.680943	0.396342	1.14181	0.875563	1.28649	1.30001	0.968985	0.750219
NK CD56bright_Tbet	0.911038	NK CD56bright	Tbet	0.988532	1.07491	0.284929	0.247855	1.23023	0.964266	0.282238	0.587428	0.481122	0.864515	0.530818	0.415722	1.03415	0.488445	1.13344	0.0509779	0	0.206333	0.391335	0	0.146575	0.213084	0.842161	0.181994	0.701924	0.844847	0.600461	0	0	0.25183	0
NK CD56dim_CD31/PECAM_1	0.0153879	NK CD56dim	CD31/PECAM_1	0.153879	0.260252	0.460817	0.125867	0.226849	0.205941	0.323526	0.370935	0.126066	0.160707	0.189464	0.160312	0.871867	0.192411	0.240864	0.253283	0.157152	0.0694442	0.148454	0	0.0242976	0.104609	0.12289	0.0675486	0.723585	0	0	0.180026	0.209073	0.211617	0.143309
NK CD56dim_CD45RA	0.870852	NK CD56dim	CD45RA	0.870852	2.78831	2.70819	3.8066	2.82828	3.56097	2.94688	3.37919	2.83602	3.86439	3.03478	3.90214	4.51569	3.33885	3.35211	1.36367	1.33612	2.57852	2.27586	3.30047	2.69147	1.80438	3.35885	2.83925	2.53349	3.22029	2.81943	0.453405	0.906741	2.68326	1.66177
NK CD56dim_CD45RO	0.849716	NK CD56dim	CD45RO	0.870852	0.745733	0.988936	0.343033	0.86616	0.589974	0.608875	0.621925	0.585559	0.43933	0.60585	0.752285	0.597084	0.691386	0.676666	0.811392	0.494499	0.297875	0.502309	0.313252	0.412686	0.498851	0.192411	0.289921	0.30753	0.528195	0.429109	0.685771	0.692667	0.527407	0.487821
NK CD56dim_CD49d	0.0415178	NK CD56dim	CD49d	0.207589	2.18236	3.09398	1.69275	1.92009	2.10962	1.95534	2.26129	1.79762	1.47285	2.27036	2.11088	2.33308	2.20891	2.36184	2.13593	2.28071	1.95539	2.18106	1.62978	1.81996	2.15445	1.86756	1.60882	1.77767	2.5103	2.15276	1.98612	2.48545	2.09389	1.87115
NK CD56dim_CD54	0.181123	NK CD56dim	CD54	0.452808	0.510884	1.23887	0.157943	1.44667	0.300841	0.269718	0.469195	0.288386	0.108885	0.334242	0.431928	0.972165	0.498674	0.279352	0.467035	0.353304	0.0290959	0.406234	0.367661	0.255995	0.332064	0.122295	0.135584	0.243001	0.585049	0.341144	0.293278	0.425998	0.665888	0.31982
NK CD56dim_CD69	0.693682	NK CD56dim	CD69	0.870852	1.00427	0.773369	0.382225	2.21689	0.342844	0.551773	0.628913	1.48808	0.347277	1.48748	2.04645	2.30961	0.691386	0.881939	0.315919	0.278101	0.483089	0.481838	0.0313948	0.209856	0	0.156955	0.0645552	0.527932	1.96154	0.474045	0	0	0.313633	0.186517
NK CD56dim_CD86	0.751837	NK CD56dim	CD86	0.870852	1.37418	2.0447	1.10929	1.43978	1.03302	1.41748	1.06644	1.46094	1.14332	1.25617	1.26184	0.725076	1.45503	1.04365	1.86121	0.918496	0.45259	0.966461	0.754075	1.0214	1.04647	0.327703	0.714449	0.480138	1.1246	0.886315	1.39113	1.38002	0.929879	0.751685
NK CD56dim_FoxP3	0.331216	NK CD56dim	FoxP3	0.662432	0.608203	1.60659	0.363164	1.20129	0.386505	0.828802	0.665562	0.547616	0.350292	0.302754	0.718943	0.897404	1.21424	1.05382	0.293374	0.177073	1.27104	0.240378	0.358849	0.474673	0.284929	0	0.108586	0.0503787	0.10063	0.484251	0.279352	0.789567	0.446242	0.206039
NK CD56dim_PDL1	0.658164	NK CD56dim	PDL1	0.870852	1.41922	2.01602	1.16238	1.50192	1.06558	1.4295	1.07735	1.48602	1.10141	1.2785	1.29426	0.726879	1.44444	1.08883	1.86333	1.00459	0.55937	1.07167	0.862296	1.06515	1.13472	0.443516	0.826159	0.559025	1.2964	1.01405	1.50145	1.47294	1.02757	0.813468
NK CD56dim_Tbet	0.0634601	NK CD56dim	Tbet	0.211534	1.8728	0.70685	1.0936	3.02117	2.67114	1.542	2.40968	1.97823	2.18822	1.55146	1.48309	1.74492	1.59729	2.03982	0.452227	0.173626	0.710971	1.03743	1.29849	0.488356	1.07711	1.96181	1.14517	2.42495	1.94964	1.59262	0.416181	0.0378909	0.456571	0.0151994
Tbet B cells_CD31/PECAM_1	0.352023	Tbet B cells	CD31/PECAM_1	0.609466	0.279545	0.294523	0	0.611726	0.372617	0.208878	0.483715	0.0692266	0.100629	0.37504	0.328462	0.182977	0.232305	0.473955	0.339633	0	0.0110998	0.296727	0.0977428	0.146871	0.102023	0	0	0.244555	0.131817	0.143111	0.267972	0.344165	0.106598	0.19869
Tbet B cells_CD45RA	0.0202347	Tbet B cells	CD45RA	0.101174	3.40492	1.99992	4.38734	3.24359	4.29673	2.17471	4.02376	3.45683	3.5041	3.57092	4.26957	4.14822	2.98877	3.00269	2.20657	1.98121	2.36053	3.03906	2.41737	2.45099	1.92264	3.40863	2.71416	3.3775	2.57514	2.88911	0.920216	1.94132	3.20899	1.37447
Tbet B cells_CD45RO	0.620101	Tbet B cells	CD45RO	0.775127	1.08732	1.14366	0.571238	1.07448	0.761984	0.683359	0.730167	0.75907	0.496542	0.862822	1.09348	0.704071	0.985009	0.941708	0.834803	0.561092	0.224021	0.624923	0.606338	0.89166	0.644949	0.390035	0.572081	0.454762	0.7613	0.524955	0.903403	0.844412	0.849772	0.631734
Tbet B cells_CD49d	0.856844	Tbet B cells	CD49d	0.931254	3.29917	3.15599	2.52465	2.99379	3.12884	2.91618	3.00321	2.31653	2.38478	2.48379	2.33309	3.04957	2.49863	3.19087	2.5706	2.23641	1.98348	2.77124	2.36225	2.59099	2.56364	2.52862	2.31059	2.5877	3.03817	2.52398	2.79631	2.88695	2.45591	2.47497
Tbet B cells_CD54	0.931254	Tbet B cells	CD54	0.931254	1.41995	1.63046	1.16416	2.2184	1.24527	0.798125	1.06644	1.59001	0.996105	1.13421	2.11241	1.47759	1.2493	1.82412	1.41721	1.3605	0.318012	1.53374	1.12477	1.05146	1.50209	1.37276	0.924542	1.64931	1.67827	1.54029	1.13408	1.22856	2.70631	1.17969
Tbet B cells_CD86	0.211723	Tbet B cells	CD86	0.529307	1.35083	1.99841	1.07543	1.53544	0.933697	1.41427	0.915187	1.71708	1.18317	1.706	1.5347	0.847022	1.99166	1.13134	1.62494	1.04045	0.67027	0.913387	0.967325	1.30618	1.25459	0.485858	0.93288	0.395786	1.36515	0.986057	1.55348	1.59729	1.20272	1.18003
Tbet B cells_FoxP3	0.0732665	Tbet B cells	FoxP3	0.244222	2.23679	3.02726	1.21583	2.3568	1.56856	2.02664	1.42242	1.36741	1.68556	0.917858	1.46797	1.2966	2.32936	2.7164	1.47442	1.40967	1.89843	1.08186	1.75679	1.54609	1.65633	0.396897	0.124677	0.600124	1.44934	1.864	1.95228	1.80052	2.25134	1.6748
Tbet B cells_PD1	0.556051	Tbet B cells	PD1	0.775127	0.0709405	0.200553	0.0653141	0	0	0	0	0	0.0221982	0.0328763	0	0	0.0235978	0	0	0	0.0146995	0	0	0.1686	0	0	0	0	0.0189986	0.0743315	0.127355	0.243196	0	0
Tbet B cells_PDL1	0.365679	Tbet B cells	PDL1	0.609466	1.39567	1.86717	1.07276	1.42715	0.760456	1.2305	0.775498	1.45432	1.06841	1.12312	1.35664	0.658881	1.81712	0.923993	1.48274	1.00737	0.567795	0.848542	0.80283	1.03112	1.24612	0.356031	0.986974	0.357346	1.26488	0.748983	1.61569	1.52618	1.16931	0.881656
Tbet B cells_Tbet	0.00306517	Tbet B cells	Tbet	0.0306517	2.56701	2.12607	0.963052	2.61496	2.78132	1.49588	2.49618	1.82637	2.32472	2.13269	1.75114	2.50217	1.56492	1.97125	1.92699	1.80994	1.10535	1.57762	1.66424	1.02922	2.04202	2.70109	0.892782	2.59441	1.83541	1.7257	1.87639	2.31459	1.4998	1.35267
Blood zoom NKB; ADvsMS	p_val	cluster_id	marker_id	p_adj	control01	ms06	ad08	ms07	ms12	ad06	ms05	control05	ms01	control03	ms02	ms11	ad05	control10	ad07	control08	control02	control06	ad04	ad01	control07	ad02	ms04	ms10	control09	ad03	ms08	ms09	ms03	control11
B cells_CD31/PECAM_1	0.0283552	B cells	CD31/PECAM_1	0.255197	0.756846	0.645771	0.532037	0.621842	0.656758	0.679492	1.00981	0.522675	0.425082	0.641736	0.544839	0.363914	0.450053	0.847022	0.550388	0.292223	0.115145	0.380548	0.527056	0.412594	0.342278	0.412962	0.31449	0.701685	0.421049	0.289346	0.397453	0.503903	0.502043	0.338688
B cells_CD45RA	0.45915	B cells	CD45RA	0.682893	3.96442	3.35358	4.78502	4.03393	4.9881	4.12682	4.34996	3.8072	4.68909	3.90672	4.53758	4.5969	3.64523	4.57985	2.61523	2.41578	3.48784	4.04175	3.68034	3.32005	2.74049	4.28071	3.76956	4.56954	4.00457	4.00661	0.920147	2.18729	3.58019	3.0175
B cells_CD45RO	0.127225	B cells	CD45RO	0.382162	0.829973	0.963867	0.428741	0.77641	0.579599	0.712237	0.561953	0.91684	0.593363	0.650617	0.671804	0.541888	0.725154	0.792274	0.776106	0.646594	0.340483	0.453495	0.444243	0.495299	0.515115	0.215332	0.375979	0.277524	0.618421	0.375699	0.77899	0.830634	0.699376	0.562985
B cells_CD49d	0.398811	B cells	CD49d	0.682893	2.34069	2.86092	2.01726	2.73612	2.92349	2.1582	2.53689	3.35573	2.49667	2.01471	2.35247	2.63671	2.30587	2.86454	2.57941	2.57863	2.23482	2.85925	2.29868	2.53522	2.30867	2.59093	1.88406	2.40831	2.73719	2.46428	2.52232	2.93467	2.61567	2.22877
B cells_CD54	0.127387	B cells	CD54	0.382162	0.879533	1.23061	0.733603	1.61878	0.823365	0.817612	0.731887	1.55926	0.743253	0.664098	0.732433	0.692347	0.686414	1.20954	1.09143	1.26843	0.137863	1.45068	0.722485	0.471531	0.796327	0.637032	0.358849	0.923513	1.32966	0.690585	0.744183	1.01968	2.04853	0.832318
B cells_CD86	0.445158	B cells	CD86	0.682893	1.2326	1.79504	0.862326	1.2834	0.724527	1.31021	0.732824	1.61878	1.01264	1.07056	1.25543	0.696344	1.45006	0.953706	1.49195	1.03352	0.361758	0.711604	0.67246	0.930561	0.92509	0.202807	0.653486	0.254833	1.06361	0.632728	1.41785	1.33346	1.02871	0.768187
B cells_FoxP3	0.737353	B cells	FoxP3	0.737353	2.49357	2.94839	2.35418	2.37241	1.71061	2.4632	1.56628	2.63034	2.20129	1.76387	2.02009	1.77335	2.35931	2.9095	1.97502	2.2748	2.25284	0.966794	1.94345	0.551427	2.20726	1.12595	0.429018	0.977779	1.78288	2.27911	1.78725	2.43113	2.58453	1.90048
B cells_PDL1	0.576954	B cells	PDL1	0.682893	1.11255	1.68997	0.861931	1.09348	0.574647	1.20767	0.632563	1.19009	0.869729	0.9614	1.00878	0.567967	1.28797	0.688501	1.3719	0.878967	0.35161	0.734541	0.668565	0.897264	0.898522	0.205941	0.659126	0.272418	1.01917	0.684806	1.49057	1.37812	0.972893	0.83947
B cells_Tbet	0.607016	B cells	Tbet	0.682893	0.0195987	0.0177991	0	0.0423873	0	0	0	0.0641529	0.168994	0	0	0.022998	0	0	0.0221982	0	0	0.0367917	0	0	0.0111998	0	0	0	0.220606	0	0	0.0435862	0	0
NK CD56bright_CD31/PECAM_1	0.434219	NK CD56bright	CD31/PECAM_1	0.537568	0.485858	0.664505	0.143903	0.292127	0.299981	0.401709	0.822039	0.142913	0.162484	0.269428	0.270104	1.01168	0.319725	0.160115	0.304665	0.154386	0.0747304	0.127752	0.350855	0.141622	0.111966	0.454853	0.0467829	0.578746	0.192803	0.0653535	0.186713	0.170374	0.172937	0.228604
NK CD56bright_CD45RA	0.559287	NK CD56bright	CD45RA	0.559287	3.39178	2.19866	3.78265	3.62786	4.07178	2.8506	3.89006	3.59208	4.06165	3.26819	3.95719	4.31737	3.20938	4.50409	1.7628	1.36405	2.67838	2.3675	2.80316	2.36431	1.65673	3.50069	3.01988	3.22957	3.20807	3.00134	0.375699	0.945225	2.72394	1.7031
NK CD56bright_CD45RO	0.0595604	NK CD56bright	CD45RO	0.198535	0.822187	1.18261	0.379057	1.023	0.653567	0.787457	0.770933	0.519426	0.448511	0.63248	0.783834	0.585814	0.74643	0.669137	0.763599	0.405957	0.218654	0.485858	0.565814	0.490654	0.47207	0.280218	0.348503	0.3956	0.57345	0.421049	0.691684	0.638106	0.558163	0.554711
NK CD56bright_CD49d	0.276274	NK CD56bright	CD49d	0.537568	1.80431	2.76655	1.3812	2.1793	1.79488	2.16619	2.09029	1.86011	1.65249	1.81264	1.41803	2.11973	1.83442	2.15037	1.73607	2.02592	1.90223	2.14784	1.68924	1.69793	1.57358	1.64433	1.97213	1.54707	2.03052	1.96137	2.00027	2.46513	2.12197	1.6756
NK CD56bright_CD54	0.036022	NK CD56bright	CD54	0.18011	1.61213	1.46516	0.676101	3.0334	2.04299	1.32142	2.34979	1.77789	0.354056	1.7155	1.27291	1.17118	2.14209	1.18451	2.62936	0.428743	0.138754	1.10607	0.706213	0.284064	1.17502	1.20943	1.61044	2.0267	1.86943	0.335094	0.786703	0.562039	0.762756	0.982253
NK CD56bright_CD69	0.00281944	NK CD56bright	CD69	0.0281944	1.26812	0.777245	0.391706	2.65379	2.38876	0.476735	2.49185	1.30578	0.42499	1.59262	2.1685	2.75113	0.696903	1.71759	0.124677	0.157547	0.502043	0.702322	0	0	0.0173991	0.772913	0.358097	1.79491	2.13593	0.277235	0	0	0.29299	0.192411
NK CD56bright_CD86	0.444727	NK CD56bright	CD86	0.537568	1.30941	2.03356	0.957057	1.43222	0.795053	1.29584	0.848036	1.20767	1.03668	1.10738	1.39268	0.710417	1.44256	0.870727	1.48834	0.769865	0.326185	0.793627	0.449377	0.9274	0.838013	0.265278	0.59607	0.26856	1.03378	0.722485	1.0519	1.1484	0.835241	0.675454
NK CD56bright_FoxP3	0.409154	NK CD56bright	FoxP3	0.537568	0.939948	1.90035	0.482642	1.8357	0.411028	0.93288	0.865731	0.82557	0.422608	0.573364	1.01469	0.947518	1.94084	1.51357	0.568139	0.317442	1.26237	0.369813	0.74711	0.526181	0.465145	0.0726361	0.306002	0.0643556	0.388178	0.609379	0.104708	0.687056	0.49521	0.590992
NK CD56bright_PDL1	0.447566	NK CD56bright	PDL1	0.537568	1.32996	2.01087	0.891519	1.47633	0.780051	1.17372	0.784589	1.20283	1.04315	1.07894	1.27757	0.673189	1.40353	0.818499	1.47381	0.853814	0.449509	0.952431	0.593776	0.871507	0.923856	0.362602	0.680943	0.396342	1.14181	0.875563	1.28649	1.30001	0.968985	0.750219
NK CD56bright_Tbet	0.483811	NK CD56bright	Tbet	0.537568	1.07491	0.284929	0.247855	1.23023	0.964266	0.282238	0.587428	0.481122	0.864515	0.530818	0.415722	1.03415	0.488445	1.13344	0.0509779	0	0.206333	0.391335	0	0.146575	0.213084	0.842161	0.181994	0.701924	0.844847	0.600461	0	0	0.25183	0
NK CD56dim_CD31/PECAM_1	0.0213622	NK CD56dim	CD31/PECAM_1	0.213622	0.260252	0.460817	0.125867	0.226849	0.205941	0.323526	0.370935	0.126066	0.160707	0.189464	0.160312	0.871867	0.192411	0.240864	0.253283	0.157152	0.0694442	0.148454	0	0.0242976	0.104609	0.12289	0.0675486	0.723585	0	0	0.180026	0.209073	0.211617	0.143309
NK CD56dim_CD45RA	0.783133	NK CD56dim	CD45RA	0.783133	2.78831	2.70819	3.8066	2.82828	3.56097	2.94688	3.37919	2.83602	3.86439	3.03478	3.90214	4.51569	3.33885	3.35211	1.36367	1.33612	2.57852	2.27586	3.30047	2.69147	1.80438	3.35885	2.83925	2.53349	3.22029	2.81943	0.453405	0.906741	2.68326	1.66177
NK CD56dim_CD45RO	0.0635182	NK CD56dim	CD45RO	0.302742	0.745733	0.988936	0.343033	0.86616	0.589974	0.608875	0.621925	0.585559	0.43933	0.60585	0.752285	0.597084	0.691386	0.676666	0.811392	0.494499	0.297875	0.502309	0.313252	0.412686	0.498851	0.192411	0.289921	0.30753	0.528195	0.429109	0.685771	0.692667	0.527407	0.487821
NK CD56dim_CD49d	0.594458	NK CD56dim	CD49d	0.660509	2.18236	3.09398	1.69275	1.92009	2.10962	1.95534	2.26129	1.79762	1.47285	2.27036	2.11088	2.33308	2.20891	2.36184	2.13593	2.28071	1.95539	2.18106	1.62978	1.81996	2.15445	1.86756	1.60882	1.77767	2.5103	2.15276	1.98612	2.48545	2.09389	1.87115
NK CD56dim_CD54	0.121097	NK CD56dim	CD54	0.302742	0.510884	1.23887	0.157943	1.44667	0.300841	0.269718	0.469195	0.288386	0.108885	0.334242	0.431928	0.972165	0.498674	0.279352	0.467035	0.353304	0.0290959	0.406234	0.367661	0.255995	0.332064	0.122295	0.135584	0.243001	0.585049	0.341144	0.293278	0.425998	0.665888	0.31982
NK CD56dim_CD69	0.183068	NK CD56dim	CD69	0.366135	1.00427	0.773369	0.382225	2.21689	0.342844	0.551773	0.628913	1.48808	0.347277	1.48748	2.04645	2.30961	0.691386	0.881939	0.315919	0.278101	0.483089	0.481838	0.0313948	0.209856	0	0.156955	0.0645552	0.527932	1.96154	0.474045	0	0	0.313633	0.186517
NK CD56dim_CD86	0.300277	NK CD56dim	CD86	0.428967	1.37418	2.0447	1.10929	1.43978	1.03302	1.41748	1.06644	1.46094	1.14332	1.25617	1.26184	0.725076	1.45503	1.04365	1.86121	0.918496	0.45259	0.966461	0.754075	1.0214	1.04647	0.327703	0.714449	0.480138	1.1246	0.886315	1.39113	1.38002	0.929879	0.751685
NK CD56dim_FoxP3	0.261651	NK CD56dim	FoxP3	0.428967	0.608203	1.60659	0.363164	1.20129	0.386505	0.828802	0.665562	0.547616	0.350292	0.302754	0.718943	0.897404	1.21424	1.05382	0.293374	0.177073	1.27104	0.240378	0.358849	0.474673	0.284929	0	0.108586	0.0503787	0.10063	0.484251	0.279352	0.789567	0.446242	0.206039
NK CD56dim_PDL1	0.354771	NK CD56dim	PDL1	0.443463	1.41922	2.01602	1.16238	1.50192	1.06558	1.4295	1.07735	1.48602	1.10141	1.2785	1.29426	0.726879	1.44444	1.08883	1.86333	1.00459	0.55937	1.07167	0.862296	1.06515	1.13472	0.443516	0.826159	0.559025	1.2964	1.01405	1.50145	1.47294	1.02757	0.813468
NK CD56dim_Tbet	0.112467	NK CD56dim	Tbet	0.302742	1.8728	0.70685	1.0936	3.02117	2.67114	1.542	2.40968	1.97823	2.18822	1.55146	1.48309	1.74492	1.59729	2.03982	0.452227	0.173626	0.710971	1.03743	1.29849	0.488356	1.07711	1.96181	1.14517	2.42495	1.94964	1.59262	0.416181	0.0378909	0.456571	0.0151994
Tbet B cells_CD31/PECAM_1	0.00528185	Tbet B cells	CD31/PECAM_1	0.0528185	0.279545	0.294523	0	0.611726	0.372617	0.208878	0.483715	0.0692266	0.100629	0.37504	0.328462	0.182977	0.232305	0.473955	0.339633	0	0.0110998	0.296727	0.0977428	0.146871	0.102023	0	0	0.244555	0.131817	0.143111	0.267972	0.344165	0.106598	0.19869
Tbet B cells_CD45RA	0.18875	Tbet B cells	CD45RA	0.455012	3.40492	1.99992	4.38734	3.24359	4.29673	2.17471	4.02376	3.45683	3.5041	3.57092	4.26957	4.14822	2.98877	3.00269	2.20657	1.98121	2.36053	3.03906	2.41737	2.45099	1.92264	3.40863	2.71416	3.3775	2.57514	2.88911	0.920216	1.94132	3.20899	1.37447
Tbet B cells_CD45RO	0.103284	Tbet B cells	CD45RO	0.344279	1.08732	1.14366	0.571238	1.07448	0.761984	0.683359	0.730167	0.75907	0.496542	0.862822	1.09348	0.704071	0.985009	0.941708	0.834803	0.561092	0.224021	0.624923	0.606338	0.89166	0.644949	0.390035	0.572081	0.454762	0.7613	0.524955	0.903403	0.844412	0.849772	0.631734
Tbet B cells_CD49d	0.0734404	Tbet B cells	CD49d	0.344279	3.29917	3.15599	2.52465	2.99379	3.12884	2.91618	3.00321	2.31653	2.38478	2.48379	2.33309	3.04957	2.49863	3.19087	2.5706	2.23641	1.98348	2.77124	2.36225	2.59099	2.56364	2.52862	2.31059	2.5877	3.03817	2.52398	2.79631	2.88695	2.45591	2.47497
Tbet B cells_CD54	0.378866	Tbet B cells	CD54	0.541237	1.41995	1.63046	1.16416	2.2184	1.24527	0.798125	1.06644	1.59001	0.996105	1.13421	2.11241	1.47759	1.2493	1.82412	1.41721	1.3605	0.318012	1.53374	1.12477	1.05146	1.50209	1.37276	0.924542	1.64931	1.67827	1.54029	1.13408	1.22856	2.70631	1.17969
Tbet B cells_CD86	0.707145	Tbet B cells	CD86	0.785717	1.35083	1.99841	1.07543	1.53544	0.933697	1.41427	0.915187	1.71708	1.18317	1.706	1.5347	0.847022	1.99166	1.13134	1.62494	1.04045	0.67027	0.913387	0.967325	1.30618	1.25459	0.485858	0.93288	0.395786	1.36515	0.986057	1.55348	1.59729	1.20272	1.18003
Tbet B cells_FoxP3	0.273007	Tbet B cells	FoxP3	0.455012	2.23679	3.02726	1.21583	2.3568	1.56856	2.02664	1.42242	1.36741	1.68556	0.917858	1.46797	1.2966	2.32936	2.7164	1.47442	1.40967	1.89843	1.08186	1.75679	1.54609	1.65633	0.396897	0.124677	0.600124	1.44934	1.864	1.95228	1.80052	2.25134	1.6748
Tbet B cells_PD1	0.916741	Tbet B cells	PD1	0.916741	0.0709405	0.200553	0.0653141	0	0	0	0	0	0.0221982	0.0328763	0	0	0.0235978	0	0	0	0.0146995	0	0	0.1686	0	0	0	0	0.0189986	0.0743315	0.127355	0.243196	0	0
Tbet B cells_PDL1	0.504262	Tbet B cells	PDL1	0.630327	1.39567	1.86717	1.07276	1.42715	0.760456	1.2305	0.775498	1.45432	1.06841	1.12312	1.35664	0.658881	1.81712	0.923993	1.48274	1.00737	0.567795	0.848542	0.80283	1.03112	1.24612	0.356031	0.986974	0.357346	1.26488	0.748983	1.61569	1.52618	1.16931	0.881656
Tbet B cells_Tbet	0.253535	Tbet B cells	Tbet	0.455012	2.56701	2.12607	0.963052	2.61496	2.78132	1.49588	2.49618	1.82637	2.32472	2.13269	1.75114	2.50217	1.56492	1.97125	1.92699	1.80994	1.10535	1.57762	1.66424	1.02922	2.04202	2.70109	0.892782	2.59441	1.83541	1.7257	1.87639	2.31459	1.4998	1.35267
Blood zoom NKB; ADvsCon	p_val	cluster_id	marker_id	p_adj	control01	ms06	ad08	ms07	ms12	ad06	ms05	control05	ms01	control03	ms02	ms11	ad05	control10	ad07	control08	control02	control06	ad04	ad01	control07	ad02	ms04	ms10	control09	ad03	ms08	ms09	ms03	control11
B cells_CD31/PECAM_1	0.208995	B cells	CD31/PECAM_1	0.376192	0.756846	0.645771	0.532037	0.621842	0.656758	0.679492	1.00981	0.522675	0.425082	0.641736	0.544839	0.363914	0.450053	0.847022	0.550388	0.292223	0.115145	0.380548	0.527056	0.412594	0.342278	0.412962	0.31449	0.701685	0.421049	0.289346	0.397453	0.503903	0.502043	0.338688
B cells_CD45RA	0.954458	B cells	CD45RA	0.954458	3.96442	3.35358	4.78502	4.03393	4.9881	4.12682	4.34996	3.8072	4.68909	3.90672	4.53758	4.5969	3.64523	4.57985	2.61523	2.41578	3.48784	4.04175	3.68034	3.32005	2.74049	4.28071	3.76956	4.56954	4.00457	4.00661	0.920147	2.18729	3.58019	3.0175
B cells_CD45RO	0.0236738	B cells	CD45RO	0.109741	0.829973	0.963867	0.428741	0.77641	0.579599	0.712237	0.561953	0.91684	0.593363	0.650617	0.671804	0.541888	0.725154	0.792274	0.776106	0.646594	0.340483	0.453495	0.444243	0.495299	0.515115	0.215332	0.375979	0.277524	0.618421	0.375699	0.77899	0.830634	0.699376	0.562985
B cells_CD49d	0.379367	B cells	CD49d	0.426788	2.34069	2.86092	2.01726	2.73612	2.92349	2.1582	2.53689	3.35573	2.49667	2.01471	2.35247	2.63671	2.30587	2.86454	2.57941	2.57863	2.23482	2.85925	2.29868	2.53522	2.30867	2.59093	1.88406	2.40831	2.73719	2.46428	2.52232	2.93467	2.61567	2.22877
B cells_CD54	0.116645	B cells	CD54	0.349934	0.879533	1.23061	0.733603	1.61878	0.823365	0.817612	0.731887	1.55926	0.743253	0.664098	0.732433	0.692347	0.686414	1.20954	1.09143	1.26843	0.137863	1.45068	0.722485	0.471531	0.796327	0.637032	0.358849	0.923513	1.32966	0.690585	0.744183	1.01968	2.04853	0.832318
B cells_CD86	0.162719	B cells	CD86	0.366118	1.2326	1.79504	0.862326	1.2834	0.724527	1.31021	0.732824	1.61878	1.01264	1.07056	1.25543	0.696344	1.45006	0.953706	1.49195	1.03352	0.361758	0.711604	0.67246	0.930561	0.92509	0.202807	0.653486	0.254833	1.06361	0.632728	1.41785	1.33346	1.02871	0.768187
B cells_FoxP3	0.0243869	B cells	FoxP3	0.109741	2.49357	2.94839	2.35418	2.37241	1.71061	2.4632	1.56628	2.63034	2.20129	1.76387	2.02009	1.77335	2.35931	2.9095	1.97502	2.2748	2.25284	0.966794	1.94345	0.551427	2.20726	1.12595	0.429018	0.977779	1.78288	2.27911	1.78725	2.43113	2.58453	1.90048
B cells_PDL1	0.343329	B cells	PDL1	0.426788	1.11255	1.68997	0.861931	1.09348	0.574647	1.20767	0.632563	1.19009	0.869729	0.9614	1.00878	0.567967	1.28797	0.688501	1.3719	0.878967	0.35161	0.734541	0.668565	0.897264	0.898522	0.205941	0.659126	0.272418	1.01917	0.684806	1.49057	1.37812	0.972893	0.83947
B cells_Tbet	0.299597	B cells	Tbet	0.426788	0.0195987	0.0177991	0	0.0423873	0	0	0	0.0641529	0.168994	0	0	0.022998	0	0	0.0221982	0	0	0.0367917	0	0	0.0111998	0	0	0	0.220606	0	0	0.0435862	0	0
NK CD56bright_CD31/PECAM_1	0.0881643	NK CD56bright	CD31/PECAM_1	0.447696	0.485858	0.664505	0.143903	0.292127	0.299981	0.401709	0.822039	0.142913	0.162484	0.269428	0.270104	1.01168	0.319725	0.160115	0.304665	0.154386	0.0747304	0.127752	0.350855	0.141622	0.111966	0.454853	0.0467829	0.578746	0.192803	0.0653535	0.186713	0.170374	0.172937	0.228604
NK CD56bright_CD45RA	0.610148	NK CD56bright	CD45RA	0.677943	3.39178	2.19866	3.78265	3.62786	4.07178	2.8506	3.89006	3.59208	4.06165	3.26819	3.95719	4.31737	3.20938	4.50409	1.7628	1.36405	2.67838	2.3675	2.80316	2.36431	1.65673	3.50069	3.01988	3.22957	3.20807	3.00134	0.375699	0.945225	2.72394	1.7031
NK CD56bright_CD45RO	0.29938	NK CD56bright	CD45RO	0.580477	0.822187	1.18261	0.379057	1.023	0.653567	0.787457	0.770933	0.519426	0.448511	0.63248	0.783834	0.585814	0.74643	0.669137	0.763599	0.405957	0.218654	0.485858	0.565814	0.490654	0.47207	0.280218	0.348503	0.3956	0.57345	0.421049	0.691684	0.638106	0.558163	0.554711
NK CD56bright_CD49d	0.195116	NK CD56bright	CD49d	0.487789	1.80431	2.76655	1.3812	2.1793	1.79488	2.16619	2.09029	1.86011	1.65249	1.81264	1.41803	2.11973	1.83442	2.15037	1.73607	2.02592	1.90223	2.14784	1.68924	1.69793	1.57358	1.64433	1.97213	1.54707	2.03052	1.96137	2.00027	2.46513	2.12197	1.6756
NK CD56bright_CD54	0.902173	NK CD56bright	CD54	0.902173	1.61213	1.46516	0.676101	3.0334	2.04299	1.32142	2.34979	1.77789	0.354056	1.7155	1.27291	1.17118	2.14209	1.18451	2.62936	0.428743	0.138754	1.10607	0.706213	0.284064	1.17502	1.20943	1.61044	2.0267	1.86943	0.335094	0.786703	0.562039	0.762756	0.982253
NK CD56bright_CD69	0.153944	NK CD56bright	CD69	0.487789	1.26812	0.777245	0.391706	2.65379	2.38876	0.476735	2.49185	1.30578	0.42499	1.59262	2.1685	2.75113	0.696903	1.71759	0.124677	0.157547	0.502043	0.702322	0	0	0.0173991	0.772913	0.358097	1.79491	2.13593	0.277235	0	0	0.29299	0.192411
NK CD56bright_CD86	0.351359	NK CD56bright	CD86	0.580477	1.30941	2.03356	0.957057	1.43222	0.795053	1.29584	0.848036	1.20767	1.03668	1.10738	1.39268	0.710417	1.44256	0.870727	1.48834	0.769865	0.326185	0.793627	0.449377	0.9274	0.838013	0.265278	0.59607	0.26856	1.03378	0.722485	1.0519	1.1484	0.835241	0.675454
NK CD56bright_FoxP3	0.0895393	NK CD56bright	FoxP3	0.447696	0.939948	1.90035	0.482642	1.8357	0.411028	0.93288	0.865731	0.82557	0.422608	0.573364	1.01469	0.947518	1.94084	1.51357	0.568139	0.317442	1.26237	0.369813	0.74711	0.526181	0.465145	0.0726361	0.306002	0.0643556	0.388178	0.609379	0.104708	0.687056	0.49521	0.590992
NK CD56bright_PDL1	0.406334	NK CD56bright	PDL1	0.580477	1.32996	2.01087	0.891519	1.47633	0.780051	1.17372	0.784589	1.20283	1.04315	1.07894	1.27757	0.673189	1.40353	0.818499	1.47381	0.853814	0.449509	0.952431	0.593776	0.871507	0.923856	0.362602	0.680943	0.396342	1.14181	0.875563	1.28649	1.30001	0.968985	0.750219
NK CD56bright_Tbet	0.588169	NK CD56bright	Tbet	0.677943	1.07491	0.284929	0.247855	1.23023	0.964266	0.282238	0.587428	0.481122	0.864515	0.530818	0.415722	1.03415	0.488445	1.13344	0.0509779	0	0.206333	0.391335	0	0.146575	0.213084	0.842161	0.181994	0.701924	0.844847	0.600461	0	0	0.25183	0
NK CD56dim_CD31/PECAM_1	0.812884	NK CD56dim	CD31/PECAM_1	0.903205	0.260252	0.460817	0.125867	0.226849	0.205941	0.323526	0.370935	0.126066	0.160707	0.189464	0.160312	0.871867	0.192411	0.240864	0.253283	0.157152	0.0694442	0.148454	0	0.0242976	0.104609	0.12289	0.0675486	0.723585	0	0	0.180026	0.209073	0.211617	0.143309
NK CD56dim_CD45RA	0.713814	NK CD56dim	CD45RA	0.892267	2.78831	2.70819	3.8066	2.82828	3.56097	2.94688	3.37919	2.83602	3.86439	3.03478	3.90214	4.51569	3.33885	3.35211	1.36367	1.33612	2.57852	2.27586	3.30047	2.69147	1.80438	3.35885	2.83925	2.53349	3.22029	2.81943	0.453405	0.906741	2.68326	1.66177
NK CD56dim_CD45RO	0.072751	NK CD56dim	CD45RO	0.2976	0.745733	0.988936	0.343033	0.86616	0.589974	0.608875	0.621925	0.585559	0.43933	0.60585	0.752285	0.597084	0.691386	0.676666	0.811392	0.494499	0.297875	0.502309	0.313252	0.412686	0.498851	0.192411	0.289921	0.30753	0.528195	0.429109	0.685771	0.692667	0.527407	0.487821
NK CD56dim_CD49d	0.0468218	NK CD56dim	CD49d	0.2976	2.18236	3.09398	1.69275	1.92009	2.10962	1.95534	2.26129	1.79762	1.47285	2.27036	2.11088	2.33308	2.20891	2.36184	2.13593	2.28071	1.95539	2.18106	1.62978	1.81996	2.15445	1.86756	1.60882	1.77767	2.5103	2.15276	1.98612	2.48545	2.09389	1.87115
NK CD56dim_CD54	0.693982	NK CD56dim	CD54	0.892267	0.510884	1.23887	0.157943	1.44667	0.300841	0.269718	0.469195	0.288386	0.108885	0.334242	0.431928	0.972165	0.498674	0.279352	0.467035	0.353304	0.0290959	0.406234	0.367661	0.255995	0.332064	0.122295	0.135584	0.243001	0.585049	0.341144	0.293278	0.425998	0.665888	0.31982
NK CD56dim_CD69	0.141237	NK CD56dim	CD69	0.353093	1.00427	0.773369	0.382225	2.21689	0.342844	0.551773	0.628913	1.48808	0.347277	1.48748	2.04645	2.30961	0.691386	0.881939	0.315919	0.278101	0.483089	0.481838	0.0313948	0.209856	0	0.156955	0.0645552	0.527932	1.96154	0.474045	0	0	0.313633	0.186517
NK CD56dim_CD86	0.248211	NK CD56dim	CD86	0.417759	1.37418	2.0447	1.10929	1.43978	1.03302	1.41748	1.06644	1.46094	1.14332	1.25617	1.26184	0.725076	1.45503	1.04365	1.86121	0.918496	0.45259	0.966461	0.754075	1.0214	1.04647	0.327703	0.714449	0.480138	1.1246	0.886315	1.39113	1.38002	0.929879	0.751685
NK CD56dim_FoxP3	0.08928	NK CD56dim	FoxP3	0.2976	0.608203	1.60659	0.363164	1.20129	0.386505	0.828802	0.665562	0.547616	0.350292	0.302754	0.718943	0.897404	1.21424	1.05382	0.293374	0.177073	1.27104	0.240378	0.358849	0.474673	0.284929	0	0.108586	0.0503787	0.10063	0.484251	0.279352	0.789567	0.446242	0.206039
NK CD56dim_PDL1	0.250656	NK CD56dim	PDL1	0.417759	1.41922	2.01602	1.16238	1.50192	1.06558	1.4295	1.07735	1.48602	1.10141	1.2785	1.29426	0.726879	1.44444	1.08883	1.86333	1.00459	0.55937	1.07167	0.862296	1.06515	1.13472	0.443516	0.826159	0.559025	1.2964	1.01405	1.50145	1.47294	1.02757	0.813468
NK CD56dim_Tbet	0.990685	NK CD56dim	Tbet	0.990685	1.8728	0.70685	1.0936	3.02117	2.67114	1.542	2.40968	1.97823	2.18822	1.55146	1.48309	1.74492	1.59729	2.03982	0.452227	0.173626	0.710971	1.03743	1.29849	0.488356	1.07711	1.96181	1.14517	2.42495	1.94964	1.59262	0.416181	0.0378909	0.456571	0.0151994
Tbet B cells_CD31/PECAM_1	0.0563582	Tbet B cells	CD31/PECAM_1	0.237453	0.279545	0.294523	0	0.611726	0.372617	0.208878	0.483715	0.0692266	0.100629	0.37504	0.328462	0.182977	0.232305	0.473955	0.339633	0	0.0110998	0.296727	0.0977428	0.146871	0.102023	0	0	0.244555	0.131817	0.143111	0.267972	0.344165	0.106598	0.19869
Tbet B cells_CD45RA	0.523005	Tbet B cells	CD45RA	0.581117	3.40492	1.99992	4.38734	3.24359	4.29673	2.17471	4.02376	3.45683	3.5041	3.57092	4.26957	4.14822	2.98877	3.00269	2.20657	1.98121	2.36053	3.03906	2.41737	2.45099	1.92264	3.40863	2.71416	3.3775	2.57514	2.88911	0.920216	1.94132	3.20899	1.37447
Tbet B cells_CD45RO	0.071236	Tbet B cells	CD45RO	0.237453	1.08732	1.14366	0.571238	1.07448	0.761984	0.683359	0.730167	0.75907	0.496542	0.862822	1.09348	0.704071	0.985009	0.941708	0.834803	0.561092	0.224021	0.624923	0.606338	0.89166	0.644949	0.390035	0.572081	0.454762	0.7613	0.524955	0.903403	0.844412	0.849772	0.631734
Tbet B cells_CD49d	0.1394	Tbet B cells	CD49d	0.296037	3.29917	3.15599	2.52465	2.99379	3.12884	2.91618	3.00321	2.31653	2.38478	2.48379	2.33309	3.04957	2.49863	3.19087	2.5706	2.23641	1.98348	2.77124	2.36225	2.59099	2.56364	2.52862	2.31059	2.5877	3.03817	2.52398	2.79631	2.88695	2.45591	2.47497
Tbet B cells_CD54	0.396112	Tbet B cells	CD54	0.49514	1.41995	1.63046	1.16416	2.2184	1.24527	0.798125	1.06644	1.59001	0.996105	1.13421	2.11241	1.47759	1.2493	1.82412	1.41721	1.3605	0.318012	1.53374	1.12477	1.05146	1.50209	1.37276	0.924542	1.64931	1.67827	1.54029	1.13408	1.22856	2.70631	1.17969
Tbet B cells_CD86	0.205779	Tbet B cells	CD86	0.296037	1.35083	1.99841	1.07543	1.53544	0.933697	1.41427	0.915187	1.71708	1.18317	1.706	1.5347	0.847022	1.99166	1.13134	1.62494	1.04045	0.67027	0.913387	0.967325	1.30618	1.25459	0.485858	0.93288	0.395786	1.36515	0.986057	1.55348	1.59729	1.20272	1.18003
Tbet B cells_FoxP3	0.0239289	Tbet B cells	FoxP3	0.237453	2.23679	3.02726	1.21583	2.3568	1.56856	2.02664	1.42242	1.36741	1.68556	0.917858	1.46797	1.2966	2.32936	2.7164	1.47442	1.40967	1.89843	1.08186	1.75679	1.54609	1.65633	0.396897	0.124677	0.600124	1.44934	1.864	1.95228	1.80052	2.25134	1.6748
Tbet B cells_PD1	0.727164	Tbet B cells	PD1	0.727164	0.0709405	0.200553	0.0653141	0	0	0	0	0	0.0221982	0.0328763	0	0	0.0235978	0	0	0	0.0146995	0	0	0.1686	0	0	0	0	0.0189986	0.0743315	0.127355	0.243196	0	0
Tbet B cells_PDL1	0.207226	Tbet B cells	PDL1	0.296037	1.39567	1.86717	1.07276	1.42715	0.760456	1.2305	0.775498	1.45432	1.06841	1.12312	1.35664	0.658881	1.81712	0.923993	1.48274	1.00737	0.567795	0.848542	0.80283	1.03112	1.24612	0.356031	0.986974	0.357346	1.26488	0.748983	1.61569	1.52618	1.16931	0.881656
Tbet B cells_Tbet	0.173731	Tbet B cells	Tbet	0.296037	2.56701	2.12607	0.963052	2.61496	2.78132	1.49588	2.49618	1.82637	2.32472	2.13269	1.75114	2.50217	1.56492	1.97125	1.92699	1.80994	1.10535	1.57762	1.66424	1.02922	2.04202	2.70109	0.892782	2.59441	1.83541	1.7257	1.87639	2.31459	1.4998	1.35267
