# Supplementary material for: Single-cell profiling reveals periventricular CD56bright NK cell accumulation in multiple sclerosis
Source: eLife. 2022 May 10;11:e73849. doi: 10.7554/eLife.73849 (PMC9135404; doi:10.7554/eLife.73849)
Supplement: Supplementary file 1. [file elife-73849-supp1.xlsx]

## Sheet: Sheet1
Supplementary File 1 Information of the donors used in this study
CyTOF
Group	Sample	Gender	Age of death	PMD (h:m)	pH (CSF)	Diagnosis	Disease duration	Braak	Cause of death	CP	Septum	Blood
Dem	2018-135	f	81	04:05:00	6.46	AD	5	5	Dementia	x		x
Dem	2019-010	f	76	03:45:00	6.55	AD	3	5	Euthanasia	x	x	x
Dem	2019-030	m	77	04:25:00	6.63	AD	na	4	AD; palliative sedation	x	x	x
Dem	2019-032	m	92	05:50:00	6.35	AD	3	4	Dementia, gastro-intestinal bleeding	x	x	x
Dem	2019-040	f	98	07:20:00	6.18	AD	na	4	Old age, dehydration due to ceased oral intake	x		x
Dem	2020-013	m	98	04:45:00	6.4	AD	10	na	Pneumonia	x	x	x
Dem	2020-027	m	78	05:00:00	6.5	AD	na	na	AD	x		x
Dem	2020-036	f	85	06:05:00	6.88	dementia	na	na	Carcinoma	x		x
MS	2018-107	f	83	07:40:00	6.54	PPMS	34	na	Ovarian cancer	x		x
MS	2019-011	m	63	10:00:00	6.52	PMS	30	na	Aspiration pneumonia and sepsis	x	x	x
MS	2019-016	f	77	09:45:00	na	SPMS	>39	na	Pneumonia	x	x	x
MS	2019-027	f	68	09:20:00	na	SPMS	18	na	Infection	x	x	x
MS	2019-031	f	53	05:50:00	6.76	PPMS	17	na	Euthanasia	x	x	x
MS	2019-043	f	61	08:05:00	6.41	SPMS	22	na	Sepsis	x		x
MS	2019-047	m	70	05:10:00	6.82	SPMS	40	na	Palliative sedation	x	x	x
MS	2019-069	f	67	06:40:00	13.12	SPMS	39	na	Sepsis	x	x
MS	2019-107	f	87	07:30:00	6.5	MS	31	na	Ceased oral intake	x	x	x
MS	2019-109	f	65	07:10:00	6.63	PPMS	3	na	Euthanasia	x	x	x
MS	2019-110	f	73	06:50:00	6.42	SPMS	41	na	Euthanasia		x	x
MS	2020-022	f	61	08:35:00	na	MS	na	na	Euthanasia	x		x
Con	2018-120	m	72	06:55:00	6.84	Non-demented control	na	4	Myeloma	x	x	x
Con	2018-123	f	82	06:20:00	na	Non-demented control	na	3	Pulmonary disease	x	x	x
Con	2019-029	m	87	06:20:00	6.47	Non-demented control	na	3	Liver failure	x	x	x
Con	2019-042	m	82	06:30:00	6.53	Non-demented control	na	2	Cancer	x		x
Con	2019-054	f	101	06:00:00	6.71	Non-demented control	na	na	Heart failure	x	x	x
Con	2019-077	f	91	09:30:00	8.38	Non-demented control	na	3	Old age	x	x	x
Con	2019-079	f	84	07:50:00	6.59	Non-demented control	na	3	Cancer	x	x	x
Con	2019-125	f	102	03:55:00	6.25	Non-demented control	na	na	Ileus	x	x	x
Con	2020-003	f	87	04:35:00	6.64	Non-demented control	na	na	Pneumonia in lung fibrosis	x	x	x
Con	2020-028	f	99	04:05:00	6.67	Non-demented control	na	na	Euthanasia	x	x	x
Multiplex immunohistochemistry
Group	Sample	Gender	Age of death	PMD (h:m)	pH (CSF)	Diagnosis	Disease duration	Braak	Cause of death	CP	Periventricular areas
Con	2005-034	m	56	14:00:00	7.03	Non-demented control	na	0	Heart failure	x
Con	2002-018	f	92	07:00:00	6.45	Non-demented control	na	1B	Urosepsis	x
Con	2014-029	f	78	07:10:00	6.32	Non-demented control	na	1A	na	x
Con	2014-043	f	60	08:10:00	6.58	Non-demented control	na	0	na	x
Con	2014-053	f	80	07:04:00	6.2	Non-demented control	na	0	na	x
Con	2015-033	m	93	07:40:00	6.2	Non-demented control	na	0A	na	x
Con	2015-035	m	73	08:00:00	5.37	Non-demented control	na	2A	na	x
Con	2018-112	f	95	04:21:00	6.59	Non-demented control	na	na	na	x
Con	ANW797	m	59	08:00:00	na	Non-demented control	na		Euthanasia		x
Con	ANW945	f	59	08:10:00	na	Non-demented control	na		Euthanasia		x
Con	ANW019	m	68	08:40:00	na	Non-demented control	na		Euthanasia		x
Con	ANW782	f	69	13:00:00	na	Non-demented control	na		Pulmonary embolism		x
Con	ANW999	m	74	10:20:00	na	Non-demented control	na		Euthanasia		x
MS	2014-058	f	74	07:50:00	6.4	SPMS	50	na	Euthanasia	x
MS	2014-072	m	54	07:50:00	6.6	SPMS	21	na	Euthanasia	x
MS	2015-006	f	57	10:40:00	6.76	SPMS	25	na	Euthanasia	x
MS	2014-056	m	70	06:55:00	6.51	SPMS	37	na	Acute heart failure	x
MS	2015-022	m	82	08:05:00	6.7	PPMS	44	na	Pneumonia	x
MS	2018-107	f	83	07:40:00	6.54	PPMS	34	na	Ovarian cancer	x
MS	2018-103	m	75	09:10:00	na	SPMS	na	na	na	x
MS	2019-011	m	63	10:00:00	6.52	PMS	30	na	Aspiration pneumonia and sepsis	x
MS	2019-043	f	61	08:04:00	6.41	SPMS	32	na	Urosepsis and hydronephrosis	x
MS	2019-047	m	70	05:10:00	6.82	SPMS	40	na	Dehydration, decompensation cordis, MS; palliative sedation	x
MS	13-081 (vu16)	m	66	10:55:00	7.28	PPMS	na	na	Euthanasia		x
MS	2019-014	m	65	07:15:00	6.1	MS	na	na	Liver cirrhosis		x
MS	2018-116	f	66	09:30:00	6.7	SPMS	na	na	Euthanasia		x
MS	2018-047	m	70	09:25:00	7.22	SPMS	na	na	Euthanasia		x
MS	2018-046	f	51	09:10:00	6.87	SPMS	na	na	Euthanasia		x
MS	2018-085	f	67	11:25:00	6.8	MS	na	na	Pneumonia		x
MS	2018-115	m	56	06:15:00	6.6	PPMS	na	na	Respiratory insufficiency		x
PMD: post-mortem delay
h:m: hours:minutes
CSF: Cerebrospinal fluid
Con: controls
CP: choroid plexus
Dem: dementia
f: female
m: male
na: not available
AD: Alzheimer’s Disease
MS: multiple sclerosis
SPMS: secondary progressive MS
PMS: progressive MS
PPMS: primary progressive MS.
