# Supplementary material for: Single-cell profiling reveals periventricular CD56bright NK cell accumulation in multiple sclerosis
Source: eLife. 2022 May 10;11:e73849. doi: 10.7554/eLife.73849 (PMC9135404; doi:10.7554/eLife.73849)
Supplement: Supplementary file 2. [file elife-73849-supp2.xlsx]

## Sheet: Sheet1
Supplementary File 2 Antibody panel used for CyTOF
Metal	Protein	Clone	μL antibody used per 100μL / 3x106 cells	In house conjugated	Company	Panel general	Panel T cells	Panel NK & B cells
151Eu	CD103	Ber-ACT8	0.125		Fluidigm	type	type	state
156Gd	CD11b (Mac-1)	ICRF44	1.5	x	Biolegend	type	state	type
147Sm	CD11c	Bu15	0.3		Fluidigm	type	state	type
143Nd	CD123 (IL-3R)	6H6	0.2		Fluidigm	type	state	state
142Nd	CD14	M5E2	1	x	Biolegend	type	state	state
209Bi	CD16	3G8	0.2		Fluidigm	type	state	type
165Ho	CD19	HIB19	0.2		Fluidigm	type	state	type
168Er	CD206 (MMR)	15-2	0.125		Fluidigm	type	state	state
163Dy	CD27	O323	0.3	x	Biolegend	type	type	type
141Pr	CD3	UCHT1	0.125		Fluidigm	type	type	type
169Tm	CD33	WM53	0.125		Fluidigm	type	state	state
172Yb	CD38	HIT2	0.75		Fluidigm	type	state	type
145Nd	CD4	RPA-T4	1		Fluidigm	type	type	state
89Y	CD45	HI30	0.2		Fluidigm	type	type	state
148Nd	CD5	UCHT2	0.2	x	Biolegend	type	state	state
176Yb	CD56 (NCAM)	HCD56	0.75		Fluidigm	type	state	type
166Er	CD64	10.1	0.125	x	Biolegend	type	state	state
171Yb	CD66b	80H3	0.03125		Fluidigm	type	state	state
146Nd	CD8a	RPA-T8	0.2		Fluidigm	type	type	state
173Yb	HLA-DR	L243	0.125		Fluidigm	type	state	state
153Eu	TCRgd	B1	1.5	x	Biolegend	type	type	state
149Sm	CD25 (IL-2R)	2A3	0.75		Fluidigm	state	type	state
158Gd	CD28	CD28.2	1.5	x	Biolegend	state	type	state
144Nd	CD31/PECAM-1	WM59	0.5		Fluidigm	state	state	state
152Sm	CD36	5-271	0.125		Fluidigm	state	state	state
150Nd	CD39	A1	0.125	x	Biolegend	state	state	state
155Gd	CD45RA	HI100	0.3	x	Biolegend	state	type	state
164Dy	CD45RO	UCHL1	0.75		Fluidigm	state	type	state
174Yb	CD49d	9F10	0.125		Fluidigm	state	state	state
170Er	CD54	HA58	0.5		Fluidigm	state	state	state
162Dy	CD69	FN50	0.3		Fluidigm	state	type	state
154Sm	CD86	IT2.2	1.5	x	Biolegend	state	state	state
159Tb	FoxP3	259D/C7	1		Fluidigm	state	type	state
167Er	Gata3	TWAJ	0.75		Fluidigm	state	state	state
161Dy	PD1	EH12.2H7	0.375	x	Biolegend	state	type	state
175Lu	PDL1	29E.2A3	1.5		Fluidigm	state	state	state
160Gd	Tbet	4B10	0.75		Fluidigm	state	state	type
