# Supplementary material for: Single-cell profiling reveals periventricular CD56bright NK cell accumulation in multiple sclerosis
Source: eLife. 2022 May 10;11:e73849. doi: 10.7554/eLife.73849 (PMC9135404; doi:10.7554/eLife.73849)
Supplement: Supplementary file 3. [file elife-73849-supp3.xlsx]

## Sheet: Sheet1
Supplementary File 3 Details of antibodies used for multiplex immunohistochemistry
Antigen	Species	Dilution	Manufacturer	Cat. Number
NKp46 (NCR1, CD335)	Rabbit	1:100	Abcam	Ab214468
Granzyme K	Rabbit	1:200	NovusBio	NBP2-49387
Collagen IV	Rabbit	1:200	Abcam	Ab6581
Granzyme B	Rat	1:100	Invitrogen	14-8889-82
CD56	Rabbit	1:200	Abcam	Ab75813
CD45	Mouse	1:100	Dako	M0701
